# Supplementary material for: Network Pharmacology-Based Study on the Active Component and Mechanism of the Anti-Non-Invasive and Invasive Bladder Urothelial Carcinoma Effects of Zhuling Jisheng Decoction
Source: Hindawi journal article supplement (doi:10.1155/2021/7667707), 2021-12-31
Supplement: f1 [file 7667707.f1.zip]

| ID       | Description  | GeneRatio | BgRatio  | pvalue   | p.adjust | qvalue   | geneID    | Count |
|----------|--------------|-----------|----------|----------|----------|----------|-----------|-------|
| hsa05161 | Hepatitis B  | 14/54     | 162/8016 | 1.74E-12 | 3.56E-10 | 1.45E-10 | BCL2/JUN/ | 14    |
| hsa04933 | AGE-RAGE     | 11/54     | 100/8016 | 3.99E-11 | 4.09E-09 | 1.66E-09 | BCL2/JUN/ | 11    |
| hsa05167 | Kaposi sarc  | 13/54     | 186/8016 | 1.79E-10 | 1.23E-08 | 4.97E-09 | PTGS2/JUN | 13    |
| hsa04657 | IL-17 signa  | 10/54     | 94/8016  | 4.73E-10 | 2.42E-08 | 9.83E-09 | PTGS2/JUN | 10    |
| hsa05163 | Human cyt    | 13/54     | 225/8016 | 1.90E-09 | 7.80E-08 | 3.16E-08 | PTGS2/CAS | 13    |
| hsa04218 | Cellular ser | 11/54     | 160/8016 | 6.48E-09 | 2.22E-07 | 8.99E-08 | IL6/CDK1/ | 11    |
| hsa05170 | Human im     | 12/54     | 212/8016 | 1.11E-08 | 3.24E-07 | 1.32E-07 | BCL2/JUN/ | 12    |
| hsa04115 | p53 signali  | 8/54      | 72/8016  | 2.13E-08 | 5.46E-07 | 2.21E-07 | BCL2/CASF | 8     |
| hsa04020 | Calcium sig  | 11/54     | 193/8016 | 4.60E-08 | 1.05E-06 | 4.25E-07 | CHRM3/CH  | 11    |
| hsa05169 | Epstein-Ba   | 11/54     | 201/8016 | 6.99E-08 | 1.43E-06 | 5.81E-07 | BCL2/JUN/ | 11    |
| hsa05219 | Bladder ca   | 6/54      | 41/8016  | 2.64E-07 | 4.91E-06 | 1.99E-06 | VEGFA/MMA | 6     |
| hsa05031 | Amphetan     | 7/54      | 69/8016  | 3.30E-07 | 5.64E-06 | 2.29E-06 | MAOB/JUN  | 7     |
| hsa04659 | Th17 cell d  | 8/54      | 107/8016 | 4.84E-07 | 7.64E-06 | 3.10E-06 | RXRA/JUN  | 8     |
| hsa04668 | TNF signal   | 8/54      | 112/8016 | 6.89E-07 | 9.85E-06 | 3.99E-06 | PTGS2/JUN | 8     |
| hsa05206 | MicroRNA     | 12/54     | 310/8016 | 7.21E-07 | 9.85E-06 | 3.99E-06 | PTGS2/BCL | 12    |
| hsa01521 | EGFR tyros   | 7/54      | 79/8016  | 8.42E-07 | 1.08E-05 | 4.37E-06 | BCL2/PRKC | 7     |
| hsa04110 | Cell cycle   | 8/54      | 124/8016 | 1.50E-06 | 1.80E-05 | 7.28E-06 | CDK1/CCN  | 8     |
| hsa05166 | Human T-     | 10/54     | 219/8016 | 1.58E-06 | 1.80E-05 | 7.28E-06 | JUN/FOS/I | 10    |
| hsa05222 | Small cell   | 17/54     | 92/8016  | 2.38E-06 | 2.57E-05 | 1.04E-05 | PTGS2/RXF | 7     |
| hsa05323 | Rheumatoid   | 7/54      | 93/8016  | 2.56E-06 | 2.62E-05 | 1.06E-05 | JUN/VEGF/ | 7     |
| hsa05162 | Measles      | 8/54      | 138/8016 | 3.36E-06 | 3.28E-05 | 1.33E-05 | BCL2/JUN/ | 8     |
| hsa01522 | Endocrine    | 7/54      | 98/8016  | 3.64E-06 | 3.39E-05 | 1.38E-05 | BCL2/JUN/ | 7     |
| hsa05223 | Non-small    | 6/54      | 66/8016  | 4.68E-06 | 4.18E-05 | 1.69E-05 | RXRA/PRK  | 6     |
| hsa04625 | C-type lec   | 7/54      | 104/8016 | 5.42E-06 | 4.63E-05 | 1.88E-05 | PTGS2/JUN | 7     |
| hsa01524 | Platinum d   | 6/54      | 73/8016  | 8.47E-06 | 6.94E-05 | 2.82E-05 | BCL2/CASF | 6     |
| hsa05140 | Leishmania   | 6/54      | 77/8016  | 1.16E-05 | 9.11E-05 | 3.69E-05 | PTGS2/JUN | 6     |
| hsa04970 | Salivary ser | 6/54      | 90/8016  | 2.84E-05 | 0.000215 | 8.74E-05 | CHRM3/AL  | 6     |
| hsa04370 | VEGF signa   | 5/54      | 59/8016  | 4.36E-05 | 0.000319 | 0.00013  | PTGS2/PR  | 5     |
| hsa04215 | Apoptosis    | 4/54      | 32/8016  | 5.75E-05 | 0.000399 | 0.000162 | BCL2/CASF | 4     |
| hsa05205 | Proteoglyc   | 8/54      | 204/8016 | 5.84E-05 | 0.000399 | 0.000162 | CASP3/PR  | 8     |
| hsa04921 | Oxytocin s   | 7/54      | 153/8016 | 6.71E-05 | 0.000444 | 0.00018  | PTGS2/JUN | 7     |
| hsa05160 | Hepatitis C  | 7/54      | 155/8016 | 7.29E-05 | 0.000467 | 0.000189 | RXRA/CAS  | 7     |
| hsa04066 | HIF-1 sign   | 6/54      | 109/8016 | 8.37E-05 | 0.00052  | 0.000211 | BCL2/PRKC | 6     |
| hsa04725 | Cholinergic  | 6/54      | 112/8016 | 9.73E-05 | 0.000587 | 0.000238 | CHRM3/CH  | 6     |
| hsa04151 | PI3K-Akt s   | 10/54     | 354/8016 | 0.000104 | 0.000612 | 0.000248 | RXRA/CHR  | 10    |
| hsa04726 | Serotonerc   | 6/54      | 115/8016 | 0.000113 | 0.000642 | 0.00026  | PTGS1/PTC | 6     |
| hsa05164 | Influenza A  | 7/54      | 170/8016 | 0.00013  | 0.000723 | 0.000293 | CASP3/CAS | 7     |
| hsa04010 | MAPK sign    | 9/54      | 295/8016 | 0.000136 | 0.000729 | 0.000296 | JUN/CASP  | 9     |
| hsa05214 | Glioma       | 5/54      | 75/8016  | 0.000139 | 0.000729 | 0.000296 | PRKCA/PR  | 5     |
| hsa05133 | Pertussis    | 5/54      | 76/8016  | 0.000148 | 0.000738 | 0.000299 | JUN/CASP  | 5     |
| hsa05212 | Pancreatic   | 5/54      | 76/8016  | 0.000148 | 0.000738 | 0.000299 | VEGFA/ST  | 5     |
| hsa05152 | Tuberculo    | 7/54      | 180/8016 | 0.000186 | 0.000908 | 0.000368 | BCL2/CASF | 7     |
| hsa04621 | NOD-like     | 17/54     | 181/8016 | 0.000193 | 0.000918 | 0.000372 | BCL2/JUN/ | 7     |
| hsa04114 | Oocyte me    | 6/54      | 128/8016 | 0.000203 | 0.000947 | 0.000384 | PGR/CDK1  | 6     |
| hsa04926 | Relaxin sig  | 6/54      | 129/8016 | 0.000212 | 0.000966 | 0.000392 | JUN/PRKC  | 6     |
| hsa04728 | Dopamine     | 6/54      | 132/8016 | 0.00024  | 0.001071 | 0.000434 | MAOB/PR   | 6     |
| hsa04012 | ErbB signa   | 5/54      | 85/8016  | 0.00025  | 0.001092 | 0.000443 | JUN/PRKC  | 5     |
| hsa05210 | Colorectal   | 5/54      | 86/8016  | 0.000265 | 0.00113  | 0.000458 | BCL2/JUN/ | 5     |
| hsa04210 | Apoptosis    | 6/54      | 136/8016 | 0.000283 | 0.001182 | 0.00048  | BCL2/JUN/ | 6     |
| hsa04915 | Estrogen si  | 6/54      | 138/8016 | 0.000306 | 0.001254 | 0.000509 | PGR/BCL2/ | 6     |
| hsa04510 | Focal adhe   | 7/54      | 199/8016 | 0.000344 | 0.001384 | 0.000562 | BCL2/JUN/ | 7     |
| hsa04658 | Th1 and Th   | 5/54      | 92/8016  | 0.000362 | 0.001416 | 0.000574 | JUN/FOS/S | 5     |
| hsa05203 | Viral carcin | 7/54      | 201/8016 | 0.000366 | 0.001416 | 0.000574 | JUN/CASP  | 7     |
| hsa04912 | GnRH sign    | 5/54      | 93/8016  | 0.000381 | 0.001446 | 0.000587 | JUN/PRKC  | 5     |
| hsa05224 | Breast can   | 6/54      | 147/8016 | 0.000429 | 0.001601 | 0.000649 | PGR/JUN/F | 6     |
| hsa05226 | Gastric can  | 6/54      | 149/8016 | 0.000462 | 0.001665 | 0.000675 | RXRA/BCL  | 6     |
| hsa05215 | Prostate ca  | 5/54      | 97/8016  | 0.000463 | 0.001665 | 0.000675 | BCL2/ERBE | 5     |

|          |                                         |          |          |          |          |            |   |
|----------|-----------------------------------------|----------|----------|----------|----------|------------|---|
| hsa04923 | Regulation4/54                          | 55/8016  | 0.000486 | 0.001719 | 0.000697 | PTGS1/PTC  | 4 |
| hsa04914 | Progesterone5/54                        | 99/8016  | 0.000508 | 0.001767 | 0.000717 | PGR/CDK1   | 5 |
| hsa05134 | Legionellosis4/54                       | 57/8016  | 0.000558 | 0.001906 | 0.000773 | CASP3/CASP | 4 |
| hsa05142 | Chagas disease5/54                      | 102/8016 | 0.000583 | 0.001928 | 0.000782 | JUN/CASP3  | 5 |
| hsa05146 | Amoebiasis5/54                          | 102/8016 | 0.000583 | 0.001928 | 0.000782 | CASP3/PRK  | 5 |
| hsa04620 | Toll-like receptor5/54                  | 104/8016 | 0.000637 | 0.002074 | 0.000841 | JUN/CASP3  | 5 |
| hsa04928 | Parathyroid hormone5/54                 | 106/8016 | 0.000695 | 0.002227 | 0.000903 | RXRA/BCL2  | 5 |
| hsa05321 | Inflammation4/54                        | 65/8016  | 0.000919 | 0.002898 | 0.001175 | JUN/IL6/ST | 4 |
| hsa04720 | Long-term potentiation4/54              | 67/8016  | 0.00103  | 0.003199 | 0.001298 | PRKCA/PRK  | 4 |
| hsa05165 | Human pathogenesis8/54                  | 330/8016 | 0.001505 | 0.004605 | 0.001868 | PTGS2/CASP | 8 |
| hsa04971 | Gastric acid secretion4/54              | 75/8016  | 0.001569 | 0.004732 | 0.001919 | CHRM3/PF   | 4 |
| hsa04380 | Osteoclast differentiation5/54          | 128/8016 | 0.001623 | 0.004822 | 0.001956 | JUN/PPAR   | 5 |
| hsa04960 | Aldosterone secretion3/54               | 37/8016  | 0.00191  | 0.005514 | 0.002237 | NR3C2/PR   | 3 |
| hsa05143 | African trypanosomiasis3/54             | 37/8016  | 0.00191  | 0.005514 | 0.002237 | PRKCA/IL6  | 3 |
| hsa04662 | B cell receptor4/54                     | 82/8016  | 0.002181 | 0.006211 | 0.002519 | JUN/FOS/F  | 4 |
| hsa05235 | PD-L1 expression4/54                    | 89/8016  | 0.002941 | 0.00826  | 0.003351 | JUN/FOS/S  | 4 |
| hsa05132 | Salmonella infection6/54                | 214/8016 | 0.002993 | 0.008293 | 0.003364 | BCL2/JUN/  | 6 |
| hsa04024 | cAMP signaling6/54                      | 216/8016 | 0.003135 | 0.008396 | 0.003406 | CHRM2/AD   | 6 |
| hsa04261 | Adrenergic transmission5/54             | 149/8016 | 0.003154 | 0.008396 | 0.003406 | ADRB2/AD   | 5 |
| hsa04932 | Non-alcoholic fatty acid metabolism5/54 | 149/8016 | 0.003154 | 0.008396 | 0.003406 | RXRA/JUN/  | 5 |
| hsa04713 | Circadian clock4/54                     | 97/8016  | 0.004012 | 0.010544 | 0.004277 | PRKCA/FO   | 4 |
| hsa05231 | Choline metabolism4/54                  | 98/8016  | 0.004162 | 0.0108   | 0.004381 | JUN/PRKC   | 4 |
| hsa04064 | NF-kappa B4/54                          | 102/8016 | 0.0048   | 0.012301 | 0.00499  | PTGS2/BCL  | 4 |
| hsa04022 | cGMP-PKC signaling5/54                  | 167/8016 | 0.00513  | 0.012857 | 0.005215 | ADRB2/AD   | 5 |
| hsa04660 | T cell receptor4/54                     | 104/8016 | 0.005143 | 0.012857 | 0.005215 | JUN/FOS/I  | 4 |
| hsa05014 | Amyotrophic lateral sclerosis3/54       | 57/8016  | 0.006542 | 0.016158 | 0.006554 | BCL2/CASP  | 3 |
| hsa05145 | Toxoplasma infection4/54                | 112/8016 | 0.006677 | 0.016296 | 0.00661  | BCL2/CASP  | 4 |
| hsa05202 | Transcription5/54                       | 186/8016 | 0.008036 | 0.01938  | 0.007862 | RXRA/PPA   | 5 |
| hsa04919 | Thyroid hormone4/54                     | 119/8016 | 0.008247 | 0.019433 | 0.007883 | RXRA/PRK   | 4 |
| hsa04935 | Growth hormone4/54                      | 119/8016 | 0.008247 | 0.019433 | 0.007883 | PRKCA/FO   | 4 |
| hsa04152 | AMPK signaling4/54                      | 120/8016 | 0.00849  | 0.019555 | 0.007932 | PPARG/AC   | 4 |
| hsa05135 | Yersinia infection4/54                  | 120/8016 | 0.00849  | 0.019555 | 0.007932 | JUN/FOS/I  | 4 |
| hsa04924 | Renin secretion3/54                     | 69/8016  | 0.011069 | 0.025103 | 0.010183 | ADRB2/CA   | 3 |
| hsa05130 | Pathogenesis5/54                        | 202/8016 | 0.011246 | 0.025103 | 0.010183 | JUN/CASP   | 5 |
| hsa04068 | FoxO signaling4/54                      | 131/8016 | 0.01147  | 0.025103 | 0.010183 | IL6/CCNB1  | 4 |
| hsa04650 | Natural killer cell4/54                 | 131/8016 | 0.01147  | 0.025103 | 0.010183 | CASP3/PR   | 4 |
| hsa05120 | Epithelial cell3/54                     | 70/8016  | 0.011511 | 0.025103 | 0.010183 | JUN/CASP   | 3 |
| hsa04270 | Vascular smooth muscle4/54              | 132/8016 | 0.01177  | 0.025399 | 0.010303 | ADRA1D/P   | 4 |
| hsa03320 | PPAR signaling3/54                      | 76/8016  | 0.014371 | 0.030688 | 0.012449 | RXRA/PPA   | 3 |
| hsa05204 | Chemical carcinogenesis3/54             | 82/8016  | 0.017601 | 0.037197 | 0.015089 | PTGS2/AD   | 3 |
| hsa04911 | Insulin secretion3/54                   | 86/8016  | 0.019961 | 0.041669 | 0.016903 | CHRM3/PF   | 3 |
| hsa04934 | Cushing syndrome4/54                    | 155/8016 | 0.020123 | 0.041669 | 0.016903 | AHR/E2F1/  | 4 |
| hsa04540 | Gap junction3/54                        | 88/8016  | 0.021204 | 0.043468 | 0.017633 | PRKCA/CD   | 3 |
| hsa04310 | Wnt signaling4/54                       | 160/8016 | 0.022322 | 0.045306 | 0.018378 | JUN/PRKC   | 4 |
| hsa04630 | JAK-STAT signaling4/54                  | 162/8016 | 0.023241 | 0.04671  | 0.018948 | BCL2/IL6/S | 4 |
| hsa00350 | Tyrosine metabolism2/54                 | 36/8016  | 0.024245 | 0.048254 | 0.019574 | ADH1C/M    | 2 |
