# Supplementary material for: Network Pharmacology-Based Study on the Active Component and Mechanism of the Anti-Non-Invasive and Invasive Bladder Urothelial Carcinoma Effects of Zhuling Jisheng Decoction
Source: Hindawi journal article supplement (doi:10.1155/2021/7667707), 2021-12-31
Supplement: f1 [file 7667707.f1.zip]

| Category | Term      | Count | %        | PValue   | Genes        | List Total | Pop Hits | Pop Total |
|----------|-----------|-------|----------|----------|--------------|------------|----------|-----------|
| GOTERM_  | GO:004212 | 25    | 45.45455 | 3.96E-16 | CAV1, CCL    | 55         | 787      | 13528     |
| GOTERM_  | GO:004298 | 22    | 40       | 1.12E-12 | PRKCA, IL4   | 55         | 804      | 13528     |
| GOTERM_  | GO:004306 | 22    | 40       | 1.35E-12 | PRKCA, IL4   | 55         | 812      | 13528     |
| GOTERM_  | GO:001094 | 22    | 40       | 1.45E-12 | PRKCA, IL4   | 55         | 815      | 13528     |
| GOTERM_  | GO:000828 | 17    | 30.90909 | 3.23E-12 | PRKCA, IL4   | 55         | 414      | 13528     |
| GOTERM_  | GO:001003 | 20    | 36.36364 | 1.60E-11 | PRKCA, CA    | 55         | 721      | 13528     |
| GOTERM_  | GO:004854 | 12    | 21.81818 | 1.99E-10 | PRKCA, FO    | 55         | 192      | 13528     |
| GOTERM_  | GO:000971 | 15    | 27.27273 | 4.05E-10 | PRKCA, CA    | 55         | 405      | 13528     |
| GOTERM_  | GO:005138 | 9     | 16.36364 | 7.11E-10 | PRKCA, FO    | 55         | 78       | 13528     |
| GOTERM_  | GO:000972 | 14    | 25.45455 | 1.41E-09 | PRKCA, CA    | 55         | 367      | 13528     |
| GOTERM_  | GO:003196 | 9     | 16.36364 | 1.43E-09 | PRKCA, FO    | 55         | 85       | 13528     |
| GOTERM_  | GO:001060 | 19    | 34.54545 | 2.50E-09 | PRKCA, E2F   | 55         | 857      | 13528     |
| GOTERM_  | GO:004259 | 18    | 32.72727 | 2.56E-09 | PRKCA, CA    | 55         | 751      | 13528     |
| GOTERM_  | GO:001064 | 13    | 23.63636 | 4.81E-09 | IL4, ADRB2   | 55         | 329      | 13528     |
| GOTERM_  | GO:005172 | 13    | 23.63636 | 5.15E-09 | E2F1, CDK1   | 55         | 331      | 13528     |
| GOTERM_  | GO:004887 | 15    | 27.27273 | 8.36E-09 | PRKCA, CA    | 55         | 512      | 13528     |
| GOTERM_  | GO:004306 | 13    | 23.63636 | 1.09E-08 | IL4, CDK1,   | 55         | 354      | 13528     |
| GOTERM_  | GO:004249 | 11    | 20       | 1.13E-08 | FOS, CAV1    | 55         | 216      | 13528     |
| GOTERM_  | GO:004306 | 13    | 23.63636 | 1.28E-08 | IL4, CDK1,   | 55         | 359      | 13528     |
| GOTERM_  | GO:006054 | 13    | 23.63636 | 1.32E-08 | IL4, CDK1,   | 55         | 360      | 13528     |
| GOTERM_  | GO:001407 | 9     | 16.36364 | 2.39E-08 | PRKCA, FO    | 55         | 121      | 13528     |
| GOTERM_  | GO:003409 | 8     | 14.54545 | 2.51E-08 | PRKCA, FO    | 55         | 79       | 13528     |
| GOTERM_  | GO:004409 | 15    | 27.27273 | 4.58E-08 | IL4, CDK1,   | 55         | 586      | 13528     |
| GOTERM_  | GO:004866 | 6     | 10.90909 | 1.32E-07 | PRKCA, IL6   | 55         | 31       | 13528     |
| GOTERM_  | GO:000724 | 20    | 36.36364 | 1.66E-07 | PRKCA, CD    | 55         | 1256     | 13528     |
| GOTERM_  | GO:003210 | 9     | 16.36364 | 2.01E-07 | PRKCA, AD    | 55         | 159      | 13528     |
| GOTERM_  | GO:000996 | 11    | 20       | 2.14E-07 | IL4, ADRB2   | 55         | 295      | 13528     |
| GOTERM_  | GO:004405 | 11    | 20       | 3.28E-07 | PRKCA, AD    | 55         | 309      | 13528     |
| GOTERM_  | GO:000694 | 6     | 10.90909 | 3.81E-07 | ADRB2, CA    | 55         | 38       | 13528     |
| GOTERM_  | GO:000693 | 7     | 12.72727 | 3.88E-07 | PRKCA, AD    | 55         | 72       | 13528     |
| GOTERM_  | GO:000691 | 14    | 25.45455 | 4.85E-07 | E2F1, E2F2   | 55         | 602      | 13528     |
| GOTERM_  | GO:000821 | 15    | 27.27273 | 5.65E-07 | E2F1, E2F2   | 55         | 719      | 13528     |
| GOTERM_  | GO:001250 | 14    | 25.45455 | 5.75E-07 | E2F1, E2F2   | 55         | 611      | 13528     |
| GOTERM_  | GO:001626 | 15    | 27.27273 | 6.14E-07 | E2F1, E2F2   | 55         | 724      | 13528     |
| GOTERM_  | GO:000301 | 9     | 16.36364 | 6.66E-07 | ADRB2, CA    | 55         | 186      | 13528     |
| GOTERM_  | GO:000801 | 9     | 16.36364 | 6.66E-07 | ADRB2, CA    | 55         | 186      | 13528     |
| GOTERM_  | GO:004306 | 12    | 21.81818 | 8.22E-07 | PRKCA, AC    | 55         | 430      | 13528     |
| GOTERM_  | GO:004306 | 12    | 21.81818 | 8.80E-07 | PRKCA, AC    | 55         | 433      | 13528     |
| GOTERM_  | GO:000961 | 13    | 23.63636 | 8.81E-07 | CCNB1, FC    | 55         | 530      | 13528     |
| GOTERM_  | GO:001094 | 12    | 21.81818 | 9.21E-07 | PRKCA, AC    | 55         | 435      | 13528     |
| GOTERM_  | GO:004866 | 6     | 10.90909 | 1.02E-06 | PRKCA, IL6   | 55         | 46       | 13528     |
| GOTERM_  | GO:000828 | 11    | 20       | 1.36E-06 | PRKCA, CA    | 55         | 361      | 13528     |
| GOTERM_  | GO:001003 | 9     | 16.36364 | 1.39E-06 | PRKCA, FO    | 55         | 205      | 13528     |
| GOTERM_  | GO:004594 | 13    | 23.63636 | 1.69E-06 | E2F1, IL4, I | 55         | 564      | 13528     |
| GOTERM_  | GO:004594 | 11    | 20       | 1.74E-06 | E2F1, IL4, F | 55         | 371      | 13528     |
| GOTERM_  | GO:000687 | 11    | 20       | 1.87E-06 | PRKCA, CA    | 55         | 374      | 13528     |
| GOTERM_  | GO:005508 | 11    | 20       | 2.16E-06 | PRKCA, CA    | 55         | 380      | 13528     |
| GOTERM_  | GO:001062 | 13    | 23.63636 | 2.31E-06 | E2F1, IL4, I | 55         | 581      | 13528     |
| GOTERM_  | GO:000999 | 9     | 16.36364 | 2.36E-06 | FOS, CAV1    | 55         | 220      | 13528     |
| GOTERM_  | GO:000961 | 6     | 10.90909 | 2.74E-06 | PRKCA, FO    | 55         | 56       | 13528     |
| GOTERM_  | GO:005132 | 7     | 12.72727 | 3.23E-06 | E2F1, CCN    | 55         | 103      | 13528     |
| GOTERM_  | GO:005124 | 8     | 14.54545 | 3.71E-06 | PRKCA, AC    | 55         | 164      | 13528     |
| GOTERM_  | GO:005132 | 7     | 12.72727 | 3.82E-06 | E2F1, CCN    | 55         | 106      | 13528     |
| GOTERM_  | GO:005080 | 11    | 20       | 4.16E-06 | PRKCA, CA    | 55         | 409      | 13528     |
| GOTERM_  | GO:001074 | 8     | 14.54545 | 4.19E-06 | IL4, ADRB2   | 55         | 167      | 13528     |
| GOTERM_  | GO:000756 | 7     | 12.72727 | 4.74E-06 | PRKCA, FO    | 55         | 110      | 13528     |
| GOTERM_  | GO:004593 | 13    | 23.63636 | 4.82E-06 | E2F1, IL4, I | 55         | 624      | 13528     |

|                   |    |          |          |              |    |     |       |
|-------------------|----|----------|----------|--------------|----|-----|-------|
| GOTERM_!GO:005092 | 5  | 9.090909 | 5.00E-06 | PRKCA, IL6   | 55 | 29  | 13528 |
| GOTERM_!GO:005124 | 9  | 16.36364 | 5.08E-06 | ADRB2, CA    | 55 | 244 | 13528 |
| GOTERM_!GO:004308 | 12 | 21.81818 | 5.20E-06 | CCNB1, CC    | 55 | 520 | 13528 |
| GOTERM_!GO:001062 | 9  | 16.36364 | 5.89E-06 | IL4, ADRB2   | 55 | 249 | 13528 |
| GOTERM_!GO:005092 | 5  | 9.090909 | 6.59E-06 | PRKCA, IL6   | 55 | 31  | 13528 |
| GOTERM_!GO:005117 | 13 | 23.63636 | 6.66E-06 | E2F1, IL4, I | 55 | 644 | 13528 |
| GOTERM_!GO:003109 | 6  | 10.90909 | 7.76E-06 | CCNB1, CC    | 55 | 69  | 13528 |
| GOTERM_!GO:001055 | 13 | 23.63636 | 7.79E-06 | E2F1, IL4, I | 55 | 654 | 13528 |
| GOTERM_!GO:000704 | 14 | 25.45455 | 8.15E-06 | E2F1, CDK:   | 55 | 776 | 13528 |
| GOTERM_!GO:003140 | 8  | 14.54545 | 8.82E-06 | PRKCA, CC    | 55 | 187 | 13528 |
| GOTERM_!GO:004852 | 5  | 9.090909 | 9.62E-06 | PRKCA, IL6   | 55 | 34  | 13528 |
| GOTERM_!GO:003355 | 12 | 21.81818 | 1.16E-05 | CDK1, FOS    | 55 | 566 | 13528 |
| GOTERM_!GO:003166 | 8  | 14.54545 | 1.24E-05 | CAV1, CCL    | 55 | 197 | 13528 |
| GOTERM_!GO:003132 | 13 | 23.63636 | 1.24E-05 | E2F1, IL4, I | 55 | 685 | 13528 |
| GOTERM_!GO:004232 | 11 | 20       | 1.31E-05 | PRKCA, IL4   | 55 | 466 | 13528 |
| GOTERM_!GO:001972 | 11 | 20       | 1.31E-05 | PRKCA, CA    | 55 | 466 | 13528 |
| GOTERM_!GO:000962 | 10 | 18.18182 | 1.33E-05 | PRKCA, FO    | 55 | 368 | 13528 |
| GOTERM_!GO:000027 | 10 | 18.18182 | 1.39E-05 | E2F1, CCN    | 55 | 370 | 13528 |
| GOTERM_!GO:000989 | 13 | 23.63636 | 1.44E-05 | E2F1, IL4, I | 55 | 695 | 13528 |
| GOTERM_!GO:005105 | 7  | 12.72727 | 1.54E-05 | PRKCA, AD    | 55 | 135 | 13528 |
| GOTERM_!GO:004589 | 11 | 20       | 1.60E-05 | E2F1, IL4, F | 55 | 477 | 13528 |
| GOTERM_!GO:000691 | 8  | 14.54545 | 1.66E-05 | CDK1, CCL    | 55 | 206 | 13528 |
| GOTERM_!GO:005125 | 11 | 20       | 1.72E-05 | E2F1, IL4, F | 55 | 481 | 13528 |
| GOTERM_!GO:005117 | 11 | 20       | 1.85E-05 | PRKCA, IL4   | 55 | 485 | 13528 |
| GOTERM_!GO:001922 | 11 | 20       | 1.85E-05 | PRKCA, IL4   | 55 | 485 | 13528 |
| GOTERM_!GO:000758 | 7  | 12.72727 | 1.89E-05 | CAV1, CCL    | 55 | 140 | 13528 |
| GOTERM_!GO:003139 | 9  | 16.36364 | 2.02E-05 | PRKCA, CC    | 55 | 295 | 13528 |
| GOTERM_!GO:000223 | 6  | 10.90909 | 2.29E-05 | FOS, IL6, C  | 55 | 86  | 13528 |
| GOTERM_!GO:006042 | 8  | 14.54545 | 3.09E-05 | PGR, CASP    | 55 | 227 | 13528 |
| GOTERM_!GO:005141 | 4  | 7.272727 | 3.25E-05 | PRKCA, FO    | 55 | 16  | 13528 |
| GOTERM_!GO:002261 | 4  | 7.272727 | 3.25E-05 | CAV1, ERB    | 55 | 16  | 13528 |
| GOTERM_!GO:004343 | 7  | 12.72727 | 3.25E-05 | PRKCA, ER    | 55 | 154 | 13528 |
| GOTERM_!GO:005079 | 5  | 9.090909 | 3.27E-05 | PRKCA, IL6   | 55 | 46  | 13528 |
| GOTERM_!GO:003227 | 8  | 14.54545 | 3.65E-05 | PRKCA, CC    | 55 | 233 | 13528 |
| GOTERM_!GO:004001 | 6  | 10.90909 | 4.30E-05 | PRKCA, IL6   | 55 | 98  | 13528 |
| GOTERM_!GO:000697 | 7  | 12.72727 | 4.62E-05 | PRKCA, FO    | 55 | 164 | 13528 |
| GOTERM_!GO:005124 | 8  | 14.54545 | 4.77E-05 | PRKCA, CC    | 55 | 243 | 13528 |
| GOTERM_!GO:004409 | 9  | 16.36364 | 4.91E-05 | PRKCA, AD    | 55 | 334 | 13528 |
| GOTERM_!GO:002170 | 6  | 10.90909 | 4.97E-05 | CCNB1, PC    | 55 | 101 | 13528 |
| GOTERM_!GO:000646 | 12 | 21.81818 | 5.30E-05 | PRKCA, CD    | 55 | 667 | 13528 |
| GOTERM_!GO:005092 | 4  | 7.272727 | 5.57E-05 | PRKCA, F3,   | 55 | 19  | 13528 |
| GOTERM_!GO:005140 | 4  | 7.272727 | 5.57E-05 | CASP3, ERI   | 55 | 19  | 13528 |
| GOTERM_!GO:005092 | 4  | 7.272727 | 5.57E-05 | PRKCA, F3,   | 55 | 19  | 13528 |
| GOTERM_!GO:004362 | 6  | 10.90909 | 5.98E-05 | PRKCA, CA    | 55 | 105 | 13528 |
| GOTERM_!GO:003257 | 4  | 7.272727 | 6.53E-05 | FOS, CAV1    | 55 | 20  | 13528 |
| GOTERM_!GO:005138 | 4  | 7.272727 | 6.53E-05 | PRKCA, FO    | 55 | 20  | 13528 |
| GOTERM_!GO:004877 | 5  | 9.090909 | 7.14E-05 | ADRB2, CA    | 55 | 56  | 13528 |
| GOTERM_!GO:000008 | 4  | 7.272727 | 7.60E-05 | CCNB1, BIF   | 55 | 21  | 13528 |
| GOTERM_!GO:003210 | 5  | 9.090909 | 1.21E-04 | PRKCA, IL6   | 55 | 64  | 13528 |
| GOTERM_!GO:000687 | 7  | 12.72727 | 1.24E-04 | PRKCA, CA    | 55 | 196 | 13528 |
| GOTERM_!GO:003327 | 5  | 9.090909 | 1.36E-04 | CCL2, PTG:   | 55 | 66  | 13528 |
| GOTERM_!GO:006053 | 6  | 10.90909 | 1.37E-04 | CAV1, ERB    | 55 | 125 | 13528 |
| GOTERM_!GO:004851 | 6  | 10.90909 | 1.53E-04 | PGR, ERBB:   | 55 | 128 | 13528 |
| GOTERM_!GO:006005 | 3  | 5.454545 | 1.55E-04 | CAV1, ERB    | 55 | 5   | 13528 |
| GOTERM_!GO:005506 | 7  | 12.72727 | 1.59E-04 | PRKCA, CA    | 55 | 205 | 13528 |
| GOTERM_!GO:005192 | 5  | 9.090909 | 1.62E-04 | ADRB2, CA    | 55 | 69  | 13528 |
| GOTERM_!GO:004239 | 6  | 10.90909 | 1.90E-04 | CAV1, JUN    | 55 | 134 | 13528 |
| GOTERM_!GO:004873 | 6  | 10.90909 | 1.96E-04 | PGR, CAV1    | 55 | 135 | 13528 |

|                   |    |          |          |              |    |      |       |
|-------------------|----|----------|----------|--------------|----|------|-------|
| GOTERM_!GO:003085 | 6  | 10.90909 | 2.10E-04 | PGR, CASP    | 55 | 137  | 13528 |
| GOTERM_!GO:002240 | 9  | 16.36364 | 2.18E-04 | E2F1, CCN    | 55 | 414  | 13528 |
| GOTERM_!GO:000030 | 5  | 9.090909 | 2.23E-04 | PRKCA, FO    | 55 | 75   | 13528 |
| GOTERM_!GO:006044 | 3  | 5.454545 | 2.32E-04 | CAV1, ERB    | 55 | 6    | 13528 |
| GOTERM_!GO:005072 | 5  | 9.090909 | 2.35E-04 | PRKCA, AD    | 55 | 76   | 13528 |
| GOTERM_!GO:003249 | 5  | 9.090909 | 2.47E-04 | FOS, CCL2,   | 55 | 77   | 13528 |
| GOTERM_!GO:000801 | 5  | 9.090909 | 2.47E-04 | PRKCA, AD    | 55 | 77   | 13528 |
| GOTERM_!GO:001631 | 12 | 21.81818 | 2.66E-04 | PRKCA, CD    | 55 | 800  | 13528 |
| GOTERM_!GO:000193 | 4  | 7.272727 | 2.75E-04 | CAV1, CCL    | 55 | 32   | 13528 |
| GOTERM_!GO:004277 | 5  | 9.090909 | 2.86E-04 | CDK1, TP6:   | 55 | 80   | 13528 |
| GOTERM_!GO:001095 | 5  | 9.090909 | 3.00E-04 | ADRB2, CA    | 55 | 81   | 13528 |
| GOTERM_!GO:001922 | 4  | 7.272727 | 3.30E-04 | CAV1, PTG    | 55 | 34   | 13528 |
| GOTERM_!GO:000926 | 5  | 9.090909 | 3.30E-04 | FOS, ADRE    | 55 | 83   | 13528 |
| GOTERM_!GO:001993 | 7  | 12.72727 | 3.32E-04 | ADRB2, CC    | 55 | 235  | 13528 |
| GOTERM_!GO:005109 | 6  | 10.90909 | 3.51E-04 | IL4, ADRB2   | 55 | 153  | 13528 |
| GOTERM_!GO:002240 | 10 | 18.18182 | 3.59E-04 | E2F1, CCN    | 55 | 565  | 13528 |
| GOTERM_!GO:004887 | 5  | 9.090909 | 3.61E-04 | ADRB2, PT    | 55 | 85   | 13528 |
| GOTERM_!GO:000679 | 13 | 23.63636 | 3.65E-04 | PRKCA, CD    | 55 | 973  | 13528 |
| GOTERM_!GO:000679 | 13 | 23.63636 | 3.65E-04 | PRKCA, CD    | 55 | 973  | 13528 |
| GOTERM_!GO:000193 | 5  | 9.090909 | 4.31E-04 | PRKCA, IL4   | 55 | 89   | 13528 |
| GOTERM_!GO:003033 | 5  | 9.090909 | 4.31E-04 | IL6, BCL2, I | 55 | 89   | 13528 |
| GOTERM_!GO:000007 | 5  | 9.090909 | 4.69E-04 | CDK1, BIRC   | 55 | 91   | 13528 |
| GOTERM_!GO:003000 | 7  | 12.72727 | 5.01E-04 | PRKCA, CA    | 55 | 254  | 13528 |
| GOTERM_!GO:000761 | 9  | 16.36364 | 5.03E-04 | PRKCA, IL4   | 55 | 469  | 13528 |
| GOTERM_!GO:000635 | 11 | 20       | 5.25E-04 | E2F1, IL4, F | 55 | 727  | 13528 |
| GOTERM_!GO:003226 | 9  | 16.36364 | 5.40E-04 | PRKCA, CC    | 55 | 474  | 13528 |
| GOTERM_!GO:004232 | 5  | 9.090909 | 5.97E-04 | PRKCA, IL4   | 55 | 97   | 13528 |
| GOTERM_!GO:000193 | 6  | 10.90909 | 6.15E-04 | PRKCA, IL4   | 55 | 173  | 13528 |
| GOTERM_!GO:005127 | 5  | 9.090909 | 6.20E-04 | IL6, BCL2, I | 55 | 98   | 13528 |
| GOTERM_!GO:004326 | 5  | 9.090909 | 6.45E-04 | ADRB2, CA    | 55 | 99   | 13528 |
| GOTERM_!GO:003250 | 9  | 16.36364 | 6.45E-04 | CCNB1, PG    | 55 | 487  | 13528 |
| GOTERM_!GO:004860 | 9  | 16.36364 | 6.45E-04 | CCNB1, PG    | 55 | 487  | 13528 |
| GOTERM_!GO:005133 | 8  | 14.54545 | 6.54E-04 | PRKCA, AD    | 55 | 372  | 13528 |
| GOTERM_!GO:005189 | 4  | 7.272727 | 6.63E-04 | CAV1, JUN    | 55 | 43   | 13528 |
| GOTERM_!GO:000695 | 10 | 18.18182 | 6.65E-04 | IL4, FOS, IL | 55 | 615  | 13528 |
| GOTERM_!GO:001056 | 5  | 9.090909 | 6.70E-04 | PRKCA, IL4   | 55 | 100  | 13528 |
| GOTERM_!GO:000821 | 5  | 9.090909 | 6.70E-04 | ADRB2, PT    | 55 | 100  | 13528 |
| GOTERM_!GO:004593 | 5  | 9.090909 | 6.70E-04 | PRKCA, IL4   | 55 | 100  | 13528 |
| GOTERM_!GO:003313 | 3  | 5.454545 | 6.90E-04 | CAV1, IL6,   | 55 | 10   | 13528 |
| GOTERM_!GO:004308 | 7  | 12.72727 | 7.90E-04 | PRKCA, CA    | 55 | 277  | 13528 |
| GOTERM_!GO:000687 | 6  | 10.90909 | 7.93E-04 | PRKCA, CA    | 55 | 183  | 13528 |
| GOTERM_!GO:005109 | 7  | 12.72727 | 8.05E-04 | PRKCA, AD    | 55 | 278  | 13528 |
| GOTERM_!GO:005507 | 6  | 10.90909 | 8.95E-04 | PRKCA, CA    | 55 | 188  | 13528 |
| GOTERM_!GO:000007 | 4  | 7.272727 | 9.16E-04 | CDK1, CHE    | 55 | 48   | 13528 |
| GOTERM_!GO:005508 | 7  | 12.72727 | 9.33E-04 | PRKCA, CA    | 55 | 286  | 13528 |
| GOTERM_!GO:004206 | 6  | 10.90909 | 9.61E-04 | CCNB1, IL6   | 55 | 191  | 13528 |
| GOTERM_!GO:004001 | 6  | 10.90909 | 9.84E-04 | PRKCA, IL6   | 55 | 192  | 13528 |
| GOTERM_!GO:005192 | 3  | 5.454545 | 0.001006 | ADRB2, PT    | 55 | 12   | 13528 |
| GOTERM_!GO:000961 | 6  | 10.90909 | 0.001007 | FOS, IL6, C  | 55 | 193  | 13528 |
| GOTERM_!GO:000635 | 17 | 30.90909 | 0.00111  | E2F1, IL4, E | 55 | 1773 | 13528 |
| GOTERM_!GO:000718 | 5  | 9.090909 | 0.00113  | ADRB2, CC    | 55 | 115  | 13528 |
| GOTERM_!GO:003157 | 4  | 7.272727 | 0.001157 | CDK1, CHE    | 55 | 52   | 13528 |
| GOTERM_!GO:004590 | 3  | 5.454545 | 0.001186 | CAV1, PTG    | 55 | 13   | 13528 |
| GOTERM_!GO:004544 | 4  | 7.272727 | 0.001223 | ADRB2, SLI   | 55 | 53   | 13528 |
| GOTERM_!GO:001470 | 5  | 9.090909 | 0.001282 | CAV1, ERB    | 55 | 119  | 13528 |
| GOTERM_!GO:000862 | 4  | 7.272727 | 0.001291 | PRKCA, CA    | 55 | 54   | 13528 |
| GOTERM_!GO:003313 | 3  | 5.454545 | 0.00138  | CAV1, IL6,   | 55 | 14   | 13528 |
| GOTERM_!GO:005125 | 17 | 30.90909 | 0.001413 | E2F1, IL4, E | 55 | 1813 | 13528 |

|                   |    |          |          |              |    |      |       |
|-------------------|----|----------|----------|--------------|----|------|-------|
| GOTERM_!GO:000751 | 6  | 10.90909 | 0.001497 | CAV1, ERB    | 55 | 211  | 13528 |
| GOTERM_!GO:000268 | 3  | 5.454545 | 0.001588 | IL6, VEGFA   | 55 | 15   | 13528 |
| GOTERM_!GO:000193 | 3  | 5.454545 | 0.001588 | CCL2, F3, \  | 55 | 15   | 13528 |
| GOTERM_!GO:000301 | 4  | 7.272727 | 0.001589 | ADRB2, CA    | 55 | 58   | 13528 |
| GOTERM_!GO:000828 | 8  | 14.54545 | 0.001647 | E2F1, CHRI   | 55 | 436  | 13528 |
| GOTERM_!GO:001003 | 5  | 9.090909 | 0.001726 | CAV1, PTG    | 55 | 129  | 13528 |
| GOTERM_!GO:001993 | 5  | 9.090909 | 0.001776 | ADRB2, CC    | 55 | 130  | 13528 |
| GOTERM_!GO:000695 | 7  | 12.72727 | 0.001797 | FOS, IL6, C  | 55 | 325  | 13528 |
| GOTERM_!GO:005105 | 6  | 10.90909 | 0.001908 | PRKCA, AC    | 55 | 223  | 13528 |
| GOTERM_!GO:002260 | 4  | 7.272727 | 0.001925 | PGR, BCL2,   | 55 | 62   | 13528 |
| GOTERM_!GO:004212 | 4  | 7.272727 | 0.001925 | IL4, CASP3   | 55 | 62   | 13528 |
| GOTERM_!GO:003287 | 5  | 9.090909 | 0.001931 | FOS, ERBB:   | 55 | 133  | 13528 |
| GOTERM_!GO:000166 | 5  | 9.090909 | 0.001984 | CAV1, CCL    | 55 | 134  | 13528 |
| GOTERM_!GO:003087 | 4  | 7.272727 | 0.002016 | PGR, CAV1    | 55 | 63   | 13528 |
| GOTERM_!GO:000189 | 4  | 7.272727 | 0.002016 | ADRB2, BC    | 55 | 63   | 13528 |
| GOTERM_!GO:001024 | 4  | 7.272727 | 0.002016 | CCL2, PTG:   | 55 | 63   | 13528 |
| GOTERM_!GO:003000 | 6  | 10.90909 | 0.002063 | PRKCA, CA    | 55 | 227  | 13528 |
| GOTERM_!GO:000729 | 4  | 7.272727 | 0.002205 | CCNB1, PG    | 55 | 65   | 13528 |
| GOTERM_!GO:004866 | 7  | 12.72727 | 0.002222 | PRKCA, IL6   | 55 | 339  | 13528 |
| GOTERM_!GO:004598 | 3  | 5.454545 | 0.002297 | PTGS2, CH    | 55 | 18   | 13528 |
| GOTERM_!GO:000751 | 4  | 7.272727 | 0.002303 | CAV1, ERB    | 55 | 66   | 13528 |
| GOTERM_!GO:006053 | 4  | 7.272727 | 0.002303 | CAV1, ERB    | 55 | 66   | 13528 |
| GOTERM_!GO:000716 | 7  | 12.72727 | 0.002322 | FOS, ADRE    | 55 | 342  | 13528 |
| GOTERM_!GO:007048 | 5  | 9.090909 | 0.002388 | CAV1, CCL    | 55 | 141  | 13528 |
| GOTERM_!GO:004269 | 4  | 7.272727 | 0.002405 | PGR, BCL2,   | 55 | 67   | 13528 |
| GOTERM_!GO:004585 | 7  | 12.72727 | 0.002426 | PRKCA, AC    | 55 | 345  | 13528 |
| GOTERM_!GO:003286 | 4  | 7.272727 | 0.002509 | ERBB3, RXF   | 55 | 68   | 13528 |
| GOTERM_!GO:005073 | 4  | 7.272727 | 0.002509 | PRKCA, IL4   | 55 | 68   | 13528 |
| GOTERM_!GO:005506 | 6  | 10.90909 | 0.00258  | PRKCA, CA    | 55 | 239  | 13528 |
| GOTERM_!GO:004654 | 4  | 7.272727 | 0.002615 | PGR, BCL2,   | 55 | 69   | 13528 |
| GOTERM_!GO:004666 | 4  | 7.272727 | 0.002615 | PGR, BCL2,   | 55 | 69   | 13528 |
| GOTERM_!GO:004867 | 3  | 5.454545 | 0.002838 | BCL2, ERBE   | 55 | 20   | 13528 |
| GOTERM_!GO:000268 | 3  | 5.454545 | 0.002838 | IL6, VEGFA   | 55 | 20   | 13528 |
| GOTERM_!GO:004354 | 7  | 12.72727 | 0.002876 | PRKCA, AC    | 55 | 357  | 13528 |
| GOTERM_!GO:000183 | 3  | 5.454545 | 0.003128 | CASP3, JUI   | 55 | 21   | 13528 |
| GOTERM_!GO:004593 | 3  | 5.454545 | 0.003128 | PTGS2, CH    | 55 | 21   | 13528 |
| GOTERM_!GO:000940 | 3  | 5.454545 | 0.003128 | FOS, ADRE    | 55 | 21   | 13528 |
| GOTERM_!GO:000734 | 5  | 9.090909 | 0.003133 | CDK1, BCL    | 55 | 152  | 13528 |
| GOTERM_!GO:004846 | 4  | 7.272727 | 0.003314 | CCNB1, PG    | 55 | 75   | 13528 |
| GOTERM_!GO:000724 | 7  | 12.72727 | 0.003431 | PRKCA, CA    | 55 | 370  | 13528 |
| GOTERM_!GO:003117 | 6  | 10.90909 | 0.003466 | PRKCA, IL6   | 55 | 256  | 13528 |
| GOTERM_!GO:000697 | 7  | 12.72727 | 0.00357  | CDK1, CAS    | 55 | 373  | 13528 |
| GOTERM_!GO:004327 | 3  | 5.454545 | 0.00375  | ADRB2, PT    | 55 | 23   | 13528 |
| GOTERM_!GO:001033 | 3  | 5.454545 | 0.00375  | CAV1, CCL    | 55 | 23   | 13528 |
| GOTERM_!GO:004233 | 5  | 9.090909 | 0.003765 | PRKCA, IL4   | 55 | 160  | 13528 |
| GOTERM_!GO:000693 | 5  | 9.090909 | 0.003765 | PRKCA, IL4   | 55 | 160  | 13528 |
| GOTERM_!GO:000300 | 6  | 10.90909 | 0.003826 | CCNB1, PG    | 55 | 262  | 13528 |
| GOTERM_!GO:005087 | 3  | 5.454545 | 0.00408  | ADRB2, SLI   | 55 | 24   | 13528 |
| GOTERM_!GO:005067 | 4  | 7.272727 | 0.00441  | IL4, CASP3   | 55 | 83   | 13528 |
| GOTERM_!GO:007066 | 4  | 7.272727 | 0.00456  | IL4, CASP3   | 55 | 84   | 13528 |
| GOTERM_!GO:003294 | 4  | 7.272727 | 0.00456  | IL4, CASP3   | 55 | 84   | 13528 |
| GOTERM_!GO:003033 | 5  | 9.090909 | 0.004573 | IL6, BCL2, I | 55 | 169  | 13528 |
| GOTERM_!GO:000718 | 4  | 7.272727 | 0.004714 | ADRB2, PT    | 55 | 85   | 13528 |
| GOTERM_!GO:003110 | 3  | 5.454545 | 0.00478  | CCL2, PPAI   | 55 | 26   | 13528 |
| GOTERM_!GO:005254 | 4  | 7.272727 | 0.004871 | CAV1, F3, I  | 55 | 86   | 13528 |
| GOTERM_!GO:000716 | 16 | 29.09091 | 0.004916 | CCL2, PTG:   | 55 | 1856 | 13528 |
| GOTERM_!GO:004801 | 4  | 7.272727 | 0.005194 | PTGER3, CI   | 55 | 88   | 13528 |
| GOTERM_!GO:001052 | 3  | 5.454545 | 0.005926 | CAV1, BCL    | 55 | 29   | 13528 |

|                   |    |          |          |              |    |      |       |
|-------------------|----|----------|----------|--------------|----|------|-------|
| GOTERM_!GO:001993 | 4  | 7.272727 | 0.006424 | ADRB2, PT    | 55 | 95   | 13528 |
| GOTERM_!GO:005134 | 4  | 7.272727 | 0.006612 | PRKCA, CA    | 55 | 96   | 13528 |
| GOTERM_!GO:000863 | 3  | 5.454545 | 0.006753 | CASP3, JUN   | 55 | 31   | 13528 |
| GOTERM_!GO:004250 | 3  | 5.454545 | 0.006753 | IL4, CAV1,   | 55 | 31   | 13528 |
| GOTERM_!GO:004425 | 3  | 5.454545 | 0.006753 | ACACA, M     | 55 | 31   | 13528 |
| GOTERM_!GO:000193 | 3  | 5.454545 | 0.007185 | PRKCA, CA    | 55 | 32   | 13528 |
| GOTERM_!GO:005127 | 5  | 9.090909 | 0.007284 | IL6, BCL2, F | 55 | 193  | 13528 |
| GOTERM_!GO:000740 | 5  | 9.090909 | 0.007284 | PRKCA, ER    | 55 | 193  | 13528 |
| GOTERM_!GO:004887 | 4  | 7.272727 | 0.0074   | CASP3, IL6   | 55 | 100  | 13528 |
| GOTERM_!GO:003286 | 4  | 7.272727 | 0.0074   | ERBB3, RXR   | 55 | 100  | 13528 |
| GOTERM_!GO:003018 | 7  | 12.72727 | 0.00773  | PRKCA, IL6   | 55 | 438  | 13528 |
| GOTERM_!GO:001064 | 2  | 3.636364 | 0.007968 | F3, F7       | 55 | 2    | 13528 |
| GOTERM_!GO:001064 | 2  | 3.636364 | 0.007968 | F3, F7       | 55 | 2    | 13528 |
| GOTERM_!GO:001060 | 9  | 16.36364 | 0.008216 | E2F1, PRKC   | 55 | 734  | 13528 |
| GOTERM_!GO:000931 | 5  | 9.090909 | 0.008239 | FOS, CAV1    | 55 | 200  | 13528 |
| GOTERM_!GO:006024 | 4  | 7.272727 | 0.008682 | ADRB2, BC    | 55 | 106  | 13528 |
| GOTERM_!GO:000691 | 6  | 10.90909 | 0.008803 | PRKCA, CA    | 55 | 320  | 13528 |
| GOTERM_!GO:001250 | 6  | 10.90909 | 0.008916 | PRKCA, CA    | 55 | 321  | 13528 |
| GOTERM_!GO:000177 | 3  | 5.454545 | 0.009033 | CASP3, IL6   | 55 | 36   | 13528 |
| GOTERM_!GO:004642 | 3  | 5.454545 | 0.009033 | IL4, CAV1,   | 55 | 36   | 13528 |
| GOTERM_!GO:004340 | 4  | 7.272727 | 0.009369 | ADRB2, CA    | 55 | 109  | 13528 |
| GOTERM_!GO:004423 | 3  | 5.454545 | 0.009525 | ACACA, M     | 55 | 37   | 13528 |
| GOTERM_!GO:003059 | 3  | 5.454545 | 0.009525 | PRKCA, IL6   | 55 | 37   | 13528 |
| GOTERM_!GO:004866 | 5  | 9.090909 | 0.009583 | PRKCA, ER    | 55 | 209  | 13528 |
| GOTERM_!GO:000756 | 4  | 7.272727 | 0.009605 | FOS, PTGS    | 55 | 110  | 13528 |
| GOTERM_!GO:004592 | 4  | 7.272727 | 0.009605 | ADRB2, BC    | 55 | 110  | 13528 |
| GOTERM_!GO:000761 | 4  | 7.272727 | 0.009844 | PRKCA, FO    | 55 | 111  | 13528 |
| GOTERM_!GO:000027 | 6  | 10.90909 | 0.009853 | CCNB1, CC    | 55 | 329  | 13528 |
| GOTERM_!GO:004544 | 19 | 34.54545 | 0.009894 | E2F1, IL4, E | 55 | 2601 | 13528 |
| GOTERM_!GO:004881 | 5  | 9.090909 | 0.010224 | PRKCA, ER    | 55 | 213  | 13528 |
| GOTERM_!GO:006032 | 3  | 5.454545 | 0.010544 | PRKCA, IL6   | 55 | 39   | 13528 |
| GOTERM_!GO:000750 | 5  | 9.090909 | 0.010554 | CASP3, ERI   | 55 | 215  | 13528 |
| GOTERM_!GO:003284 | 4  | 7.272727 | 0.010583 | CAV1, BCL    | 55 | 114  | 13528 |
| GOTERM_!GO:005133 | 6  | 10.90909 | 0.010856 | CAV1, PTG    | 55 | 337  | 13528 |
| GOTERM_!GO:005086 | 4  | 7.272727 | 0.011353 | IL4, CASP3   | 55 | 117  | 13528 |
| GOTERM_!GO:000028 | 5  | 9.090909 | 0.011411 | CCNB1, CC    | 55 | 220  | 13528 |
| GOTERM_!GO:000706 | 5  | 9.090909 | 0.011411 | CCNB1, CC    | 55 | 220  | 13528 |
| GOTERM_!GO:003140 | 4  | 7.272727 | 0.011884 | PRKCA, CA    | 55 | 119  | 13528 |
| GOTERM_!GO:004864 | 2  | 3.636364 | 0.011928 | ADRB2, BC    | 55 | 3    | 13528 |
| GOTERM_!GO:000716 | 5  | 9.090909 | 0.012127 | ADRB2, CC    | 55 | 224  | 13528 |
| GOTERM_!GO:000008 | 5  | 9.090909 | 0.012127 | CCNB1, CC    | 55 | 224  | 13528 |
| GOTERM_!GO:005159 | 3  | 5.454545 | 0.012159 | FOS, JUN, I  | 55 | 42   | 13528 |
| GOTERM_!GO:002240 | 3  | 5.454545 | 0.012159 | PTGS2, BCL   | 55 | 42   | 13528 |
| GOTERM_!GO:000194 | 3  | 5.454545 | 0.012159 | PTGS2, BCL   | 55 | 42   | 13528 |
| GOTERM_!GO:002240 | 3  | 5.454545 | 0.012159 | PTGS2, BCL   | 55 | 42   | 13528 |
| GOTERM_!GO:005110 | 4  | 7.272727 | 0.01243  | IL4, IL6, RU | 55 | 121  | 13528 |
| GOTERM_!GO:004230 | 3  | 5.454545 | 0.01272  | PTGS2, BCL   | 55 | 43   | 13528 |
| GOTERM_!GO:004263 | 3  | 5.454545 | 0.01272  | PTGS2, BCL   | 55 | 43   | 13528 |
| GOTERM_!GO:004828 | 5  | 9.090909 | 0.013063 | CCNB1, CC    | 55 | 229  | 13528 |
| GOTERM_!GO:004860 | 4  | 7.272727 | 0.013855 | PGR, BCL2,   | 55 | 126  | 13528 |
| GOTERM_!GO:004232 | 3  | 5.454545 | 0.013874 | PRKCA, CA    | 55 | 45   | 13528 |
| GOTERM_!GO:003523 | 4  | 7.272727 | 0.01415  | BCL2, VEGI   | 55 | 127  | 13528 |
| GOTERM_!GO:004513 | 4  | 7.272727 | 0.01415  | PGR, BCL2,   | 55 | 127  | 13528 |
| GOTERM_!GO:003009 | 5  | 9.090909 | 0.014449 | IL4, BCL2, \ | 55 | 236  | 13528 |
| GOTERM_!GO:004858 | 5  | 9.090909 | 0.014449 | PRKCA, IL6   | 55 | 236  | 13528 |
| GOTERM_!GO:001810 | 3  | 5.454545 | 0.014468 | ERBB3, ERE   | 55 | 46   | 13528 |
| GOTERM_!GO:000252 | 4  | 7.272727 | 0.015369 | IL4, BCL2, F | 55 | 131  | 13528 |
| GOTERM_!GO:003003 | 6  | 10.90909 | 0.015405 | PRKCA, IL6   | 55 | 368  | 13528 |

|                   |   |          |          |              |    |     |       |
|-------------------|---|----------|----------|--------------|----|-----|-------|
| GOTERM_!GO:004593 | 3 | 5.454545 | 0.015689 | PRKCA, CA    | 55 | 48  | 13528 |
| GOTERM_!GO:001056 | 3 | 5.454545 | 0.015689 | PRKCA, CA    | 55 | 48  | 13528 |
| GOTERM_!GO:001821 | 3 | 5.454545 | 0.015689 | ERBB3, ERF   | 55 | 48  | 13528 |
| GOTERM_!GO:004341 | 3 | 5.454545 | 0.015689 | ADRB2, IL6   | 55 | 48  | 13528 |
| GOTERM_!GO:000709 | 2 | 3.636364 | 0.015873 | CDK1, CCN    | 55 | 4   | 13528 |
| GOTERM_!GO:000254 | 2 | 3.636364 | 0.015873 | IL6, CCL2    | 55 | 4   | 13528 |
| GOTERM_!GO:004584 | 2 | 3.636364 | 0.015873 | ADRB2, BC    | 55 | 4   | 13528 |
| GOTERM_!GO:004863 | 2 | 3.636364 | 0.015873 | ADRB2, BC    | 55 | 4   | 13528 |
| GOTERM_!GO:000090 | 5 | 9.090909 | 0.016144 | PRKCA, ER    | 55 | 244 | 13528 |
| GOTERM_!GO:003258 | 4 | 7.272727 | 0.016322 | IL4, IL6, RX | 55 | 134 | 13528 |
| GOTERM_!GO:000156 | 5 | 9.090909 | 0.016364 | CAV1, JUN    | 55 | 245 | 13528 |
| GOTERM_!GO:004885 | 5 | 9.090909 | 0.016364 | PRKCA, ER    | 55 | 245 | 13528 |
| GOTERM_!GO:001064 | 5 | 9.090909 | 0.017036 | PRKCA, AC    | 55 | 248 | 13528 |
| GOTERM_!GO:005508 | 3 | 5.454545 | 0.017599 | CAV1, PPA    | 55 | 51  | 13528 |
| GOTERM_!GO:005086 | 3 | 5.454545 | 0.017599 | IL4, CASP3   | 55 | 51  | 13528 |
| GOTERM_!GO:000194 | 5 | 9.090909 | 0.017726 | CAV1, JUN    | 55 | 251 | 13528 |
| GOTERM_!GO:005087 | 4 | 7.272727 | 0.01867  | IL6, PTGER   | 55 | 141 | 13528 |
| GOTERM_!GO:004340 | 4 | 7.272727 | 0.01867  | PRKCA, CA    | 55 | 141 | 13528 |
| GOTERM_!GO:003299 | 5 | 9.090909 | 0.018913 | PRKCA, ER    | 55 | 256 | 13528 |
| GOTERM_!GO:003515 | 3 | 5.454545 | 0.018925 | ADRB2, CA    | 55 | 53  | 13528 |
| GOTERM_!GO:005088 | 3 | 5.454545 | 0.018925 | ADRB2, CA    | 55 | 53  | 13528 |
| GOTERM_!GO:003235 | 3 | 5.454545 | 0.019603 | PRKCA, PT    | 55 | 54  | 13528 |
| GOTERM_!GO:004848 | 2 | 3.636364 | 0.019803 | ERBB2, TP6   | 55 | 5   | 13528 |
| GOTERM_!GO:000759 | 2 | 3.636364 | 0.019803 | F3, F7       | 55 | 5   | 13528 |
| GOTERM_!GO:004853 | 5 | 9.090909 | 0.019898 | IL4, BCL2, \ | 55 | 260 | 13528 |
| GOTERM_!GO:004254 | 3 | 5.454545 | 0.02099  | JUN, BCL2,   | 55 | 56  | 13528 |
| GOTERM_!GO:005124 | 4 | 7.272727 | 0.021197 | IL4, CASP3   | 55 | 148 | 13528 |
| GOTERM_!GO:005090 | 3 | 5.454545 | 0.021698 | PRKCA, IL6   | 55 | 57  | 13528 |
| GOTERM_!GO:000754 | 4 | 7.272727 | 0.022335 | PGR, BCL2,   | 55 | 151 | 13528 |
| GOTERM_!GO:003164 | 4 | 7.272727 | 0.023112 | ADRB2, CC    | 55 | 153 | 13528 |
| GOTERM_!GO:000762 | 5 | 9.090909 | 0.023594 | PRKCA, IL4   | 55 | 274 | 13528 |
| GOTERM_!GO:003132 | 7 | 12.72727 | 0.023696 | E2F1, PRKC   | 55 | 561 | 13528 |
| GOTERM_!GO:006039 | 2 | 3.636364 | 0.023717 | FOS, JUN     | 55 | 6   | 13528 |
| GOTERM_!GO:000717 | 3 | 5.454545 | 0.023882 | FOS, CCL2,   | 55 | 60  | 13528 |
| GOTERM_!GO:001021 | 3 | 5.454545 | 0.023882 | CAV1, CCL    | 55 | 60  | 13528 |
| GOTERM_!GO:000189 | 3 | 5.454545 | 0.023882 | PTGS2, RXI   | 55 | 60  | 13528 |
| GOTERM_!GO:000252 | 5 | 9.090909 | 0.024153 | IL4, BCL2, \ | 55 | 276 | 13528 |
| GOTERM_!GO:000963 | 3 | 5.454545 | 0.024629 | PRKCA, FO    | 55 | 61  | 13528 |
| GOTERM_!GO:000989 | 7 | 12.72727 | 0.025962 | E2F1, PRKC   | 55 | 573 | 13528 |
| GOTERM_!GO:004576 | 3 | 5.454545 | 0.026152 | IL6, ERBB2,  | 55 | 63  | 13528 |
| GOTERM_!GO:003166 | 3 | 5.454545 | 0.026928 | FOS, CAV1    | 55 | 64  | 13528 |
| GOTERM_!GO:004547 | 3 | 5.454545 | 0.026928 | PRKCA, CC    | 55 | 64  | 13528 |
| GOTERM_!GO:000858 | 3 | 5.454545 | 0.026928 | PGR, BCL2,   | 55 | 64  | 13528 |
| GOTERM_!GO:000308 | 2 | 3.636364 | 0.027616 | ADRB2, AC    | 55 | 7   | 13528 |
| GOTERM_!GO:001406 | 2 | 3.636364 | 0.027616 | ERBB3, ERF   | 55 | 7   | 13528 |
| GOTERM_!GO:000199 | 2 | 3.636364 | 0.027616 | ADRB2, AC    | 55 | 7   | 13528 |
| GOTERM_!GO:003114 | 3 | 5.454545 | 0.027712 | CCNB1, CC    | 55 | 65  | 13528 |
| GOTERM_!GO:000269 | 4 | 7.272727 | 0.028519 | IL4, CASP3   | 55 | 166 | 13528 |
| GOTERM_!GO:005130 | 5 | 9.090909 | 0.029877 | CCNB1, CC    | 55 | 295 | 13528 |
| GOTERM_!GO:005143 | 3 | 5.454545 | 0.030122 | CCNB1, CC    | 55 | 68  | 13528 |
| GOTERM_!GO:003241 | 2 | 3.636364 | 0.031499 | ADRB2, CA    | 55 | 8   | 13528 |
| GOTERM_!GO:003100 | 2 | 3.636364 | 0.031499 | BCL2, PPAI   | 55 | 8   | 13528 |
| GOTERM_!GO:003164 | 2 | 3.636364 | 0.031499 | ADRB2, PT    | 55 | 8   | 13528 |
| GOTERM_!GO:003085 | 2 | 3.636364 | 0.031499 | CAV1, TP6:   | 55 | 8   | 13528 |
| GOTERM_!GO:001922 | 3 | 5.454545 | 0.031773 | IL6, CCL2, ! | 55 | 70  | 13528 |
| GOTERM_!GO:004338 | 3 | 5.454545 | 0.031773 | IL4, IL6, CA | 55 | 70  | 13528 |
| GOTERM_!GO:005144 | 3 | 5.454545 | 0.031773 | CCNB1, CC    | 55 | 70  | 13528 |
| GOTERM_!GO:005067 | 3 | 5.454545 | 0.032611 | PGR, ERBB:   | 55 | 71  | 13528 |

|                   |   |          |          |              |    |     |       |
|-------------------|---|----------|----------|--------------|----|-----|-------|
| GOTERM_!GO:005143 | 3 | 5.454545 | 0.032611 | CCNB1, CC    | 55 | 71  | 13528 |
| GOTERM_!GO:005086 | 4 | 7.272727 | 0.032623 | IL4, CASP3   | 55 | 175 | 13528 |
| GOTERM_!GO:005135 | 3 | 5.454545 | 0.034315 | CCNB1, CC    | 55 | 73  | 13528 |
| GOTERM_!GO:005134 | 4 | 7.272727 | 0.034542 | PTGER3, CI   | 55 | 179 | 13528 |
| GOTERM_!GO:004872 | 4 | 7.272727 | 0.03503  | BCL2, RXR/   | 55 | 180 | 13528 |
| GOTERM_!GO:003226 | 4 | 7.272727 | 0.03503  | PRKCA, CA    | 55 | 180 | 13528 |
| GOTERM_!GO:004000 | 4 | 7.272727 | 0.036518 | CCNB1, PT    | 55 | 183 | 13528 |
| GOTERM_!GO:000854 | 4 | 7.272727 | 0.037021 | CASP3, PT    | 55 | 184 | 13528 |
| GOTERM_!GO:000150 | 5 | 9.090909 | 0.038173 | PRKCA, PT    | 55 | 319 | 13528 |
| GOTERM_!GO:005124 | 4 | 7.272727 | 0.038551 | PRKCA, CA    | 55 | 187 | 13528 |
| GOTERM_!GO:005143 | 3 | 5.454545 | 0.038721 | CCNB1, CC    | 55 | 78  | 13528 |
| GOTERM_!GO:005109 | 3 | 5.454545 | 0.038721 | IL4, IL6, CA | 55 | 78  | 13528 |
| GOTERM_!GO:003027 | 3 | 5.454545 | 0.038721 | ADRB2, IL6   | 55 | 78  | 13528 |
| GOTERM_!GO:005093 | 2 | 3.636364 | 0.039221 | PRKCA, VE    | 55 | 10  | 13528 |
| GOTERM_!GO:001407 | 2 | 3.636364 | 0.039221 | BCL2, PPAI   | 55 | 10  | 13528 |
| GOTERM_!GO:000269 | 2 | 3.636364 | 0.039221 | IL6, F7      | 55 | 10  | 13528 |
| GOTERM_!GO:003110 | 2 | 3.636364 | 0.039221 | BCL2, RXR/   | 55 | 10  | 13528 |
| GOTERM_!GO:004295 | 2 | 3.636364 | 0.039221 | PPARG, PR    | 55 | 10  | 13528 |
| GOTERM_!GO:004328 | 3 | 5.454545 | 0.039627 | F3, BIRC5, I | 55 | 79  | 13528 |
| GOTERM_!GO:000663 | 3 | 5.454545 | 0.039627 | PTGS2, PT    | 55 | 79  | 13528 |
| GOTERM_!GO:000695 | 3 | 5.454545 | 0.039627 | IL6, CCL2, I | 55 | 79  | 13528 |
| GOTERM_!GO:000692 | 6 | 10.90909 | 0.040401 | PRKCA, IL6   | 55 | 475 | 13528 |
| GOTERM_!GO:005134 | 3 | 5.454545 | 0.041464 | CCNB1, CC    | 55 | 81  | 13528 |
| GOTERM_!GO:005254 | 3 | 5.454545 | 0.042394 | F3, BIRC5, I | 55 | 82  | 13528 |
| GOTERM_!GO:004645 | 2 | 3.636364 | 0.043059 | PTGS2, PT    | 55 | 11  | 13528 |
| GOTERM_!GO:000178 | 2 | 3.636364 | 0.043059 | CASP3, BC    | 55 | 11  | 13528 |
| GOTERM_!GO:000268 | 2 | 3.636364 | 0.043059 | IL6, F7      | 55 | 11  | 13528 |
| GOTERM_!GO:004358 | 2 | 3.636364 | 0.043059 | ERBB3, ERE   | 55 | 11  | 13528 |
| GOTERM_!GO:000151 | 2 | 3.636364 | 0.043059 | PTGS2, PT    | 55 | 11  | 13528 |
| GOTERM_!GO:005189 | 2 | 3.636364 | 0.043059 | F3, F7       | 55 | 11  | 13528 |
| GOTERM_!GO:000721 | 2 | 3.636364 | 0.043059 | CHRM3, CI    | 55 | 11  | 13528 |
| GOTERM_!GO:003139 | 3 | 5.454545 | 0.044277 | CCNB1, CC    | 55 | 84  | 13528 |
| GOTERM_!GO:000739 | 4 | 7.272727 | 0.044993 | CASP3, PT    | 55 | 199 | 13528 |
| GOTERM_!GO:005104 | 4 | 7.272727 | 0.046683 | PRKCA, IL6   | 55 | 202 | 13528 |
| GOTERM_!GO:003110 | 2 | 3.636364 | 0.046882 | BCL2, RXR/   | 55 | 12  | 13528 |
| GOTERM_!GO:004600 | 2 | 3.636364 | 0.046882 | IL4, CASP3   | 55 | 12  | 13528 |
| GOTERM_!GO:001406 | 2 | 3.636364 | 0.046882 | ERBB3, ERE   | 55 | 12  | 13528 |
| GOTERM_!GO:004858 | 3 | 5.454545 | 0.04716  | CCNB1, PT    | 55 | 87  | 13528 |
| GOTERM_!GO:004319 | 3 | 5.454545 | 0.04716  | IL4, IL6, PP | 55 | 87  | 13528 |
| GOTERM_!GO:000646 | 3 | 5.454545 | 0.04716  | PRKCA, CA    | 55 | 87  | 13528 |
| GOTERM_!GO:005114 | 3 | 5.454545 | 0.048136 | ERBB2, RXF   | 55 | 88  | 13528 |
| GOTERM_!GO:003367 | 3 | 5.454545 | 0.05011  | PRKCA, CA    | 55 | 90  | 13528 |
| GOTERM_!GO:004352 | 3 | 5.454545 | 0.05011  | ERBB3, JUN   | 55 | 90  | 13528 |
| GOTERM_!GO:000625 | 6 | 10.90909 | 0.050628 | FOS, CASP    | 55 | 506 | 13528 |
| GOTERM_!GO:003157 | 2 | 3.636364 | 0.050689 | CDK1, CCN    | 55 | 13  | 13528 |
| GOTERM_!GO:003461 | 2 | 3.636364 | 0.050689 | CASP3, CA    | 55 | 13  | 13528 |
| GOTERM_!GO:001406 | 2 | 3.636364 | 0.050689 | ERBB3, ERE   | 55 | 13  | 13528 |
| GOTERM_!GO:004582 | 2 | 3.636364 | 0.050689 | PRKCA, AD    | 55 | 13  | 13528 |
| GOTERM_!GO:004252 | 2 | 3.636364 | 0.050689 | IL4, CAV1    | 55 | 13  | 13528 |
| GOTERM_!GO:001060 | 4 | 7.272727 | 0.051939 | PRKCA, IL6   | 55 | 211 | 13528 |
| GOTERM_!GO:004851 | 4 | 7.272727 | 0.051939 | CAV1, JUN    | 55 | 211 | 13528 |
| GOTERM_!GO:003030 | 3 | 5.454545 | 0.052113 | BCL2, PPAI   | 55 | 92  | 13528 |
| GOTERM_!GO:003009 | 3 | 5.454545 | 0.053125 | VEGFA, PP    | 55 | 93  | 13528 |
| GOTERM_!GO:000090 | 5 | 9.090909 | 0.053327 | PRKCA, ER    | 55 | 356 | 13528 |
| GOTERM_!GO:003027 | 2 | 3.636364 | 0.054483 | ADRB2, BC    | 55 | 14  | 13528 |
| GOTERM_!GO:004506 | 2 | 3.636364 | 0.054483 | BCL2, TOP    | 55 | 14  | 13528 |
| GOTERM_!GO:003526 | 2 | 3.636364 | 0.054483 | BCL2, RXR/   | 55 | 14  | 13528 |
| GOTERM_!GO:003241 | 2 | 3.636364 | 0.054483 | ADRB2, CA    | 55 | 14  | 13528 |

|                   |   |          |          |              |    |      |       |
|-------------------|---|----------|----------|--------------|----|------|-------|
| GOTERM_!GO:003072 | 2 | 3.636364 | 0.054483 | PGR, PTGS    | 55 | 14   | 13528 |
| GOTERM_!GO:004559 | 4 | 7.272727 | 0.054978 | IL4, CAV1,   | 55 | 216  | 13528 |
| GOTERM_!GO:000695 | 7 | 12.72727 | 0.055888 | IL4, IL6, CC | 55 | 690  | 13528 |
| GOTERM_!GO:000650 | 9 | 16.36364 | 0.056316 | CCNB1, CC    | 55 | 1054 | 13528 |
| GOTERM_!GO:003529 | 4 | 7.272727 | 0.05747  | BCL2, VEGI   | 55 | 220  | 13528 |
| GOTERM_!GO:000996 | 4 | 7.272727 | 0.058102 | PRKCA, AC    | 55 | 221  | 13528 |
| GOTERM_!GO:000252 | 3 | 5.454545 | 0.058291 | IL6, PTGER   | 55 | 98   | 13528 |
| GOTERM_!GO:004579 | 3 | 5.454545 | 0.059344 | BCL2, PPAI   | 55 | 99   | 13528 |
| GOTERM_!GO:003139 | 3 | 5.454545 | 0.060404 | CCNB1, CC    | 55 | 100  | 13528 |
| GOTERM_!GO:004858 | 3 | 5.454545 | 0.060404 | PRKCA, AC    | 55 | 100  | 13528 |
| GOTERM_!GO:000200 | 3 | 5.454545 | 0.061471 | BCL2, CASI   | 55 | 101  | 13528 |
| GOTERM_!GO:003328 | 2 | 3.636364 | 0.062024 | PTGS2, RXI   | 55 | 16   | 13528 |
| GOTERM_!GO:003157 | 2 | 3.636364 | 0.062024 | CDK1, CCN    | 55 | 16   | 13528 |
| GOTERM_!GO:004316 | 3 | 5.454545 | 0.062544 | CCNB1, CC    | 55 | 102  | 13528 |
| GOTERM_!GO:001049 | 3 | 5.454545 | 0.062544 | CCNB1, CC    | 55 | 102  | 13528 |
| GOTERM_!GO:000759 | 3 | 5.454545 | 0.062544 | IL6, F3, F7  | 55 | 102  | 13528 |
| GOTERM_!GO:005081 | 3 | 5.454545 | 0.062544 | IL6, F3, F7  | 55 | 102  | 13528 |
| GOTERM_!GO:004559 | 4 | 7.272727 | 0.063272 | IL6, JUN, B  | 55 | 229  | 13528 |
| GOTERM_!GO:000742 | 4 | 7.272727 | 0.063272 | ERBB3, BCL   | 55 | 229  | 13528 |
| GOTERM_!GO:000717 | 3 | 5.454545 | 0.063624 | FOS, CCL2,   | 55 | 103  | 13528 |
| GOTERM_!GO:004231 | 2 | 3.636364 | 0.065773 | CAV1, ADF    | 55 | 17   | 13528 |
| GOTERM_!GO:005189 | 2 | 3.636364 | 0.065773 | F3, F7       | 55 | 17   | 13528 |
| GOTERM_!GO:000205 | 2 | 3.636364 | 0.065773 | VEGFA, TP    | 55 | 17   | 13528 |
| GOTERM_!GO:004424 | 2 | 3.636364 | 0.065773 | ADRB2, IL6   | 55 | 17   | 13528 |
| GOTERM_!GO:001055 | 6 | 10.90909 | 0.06632  | E2F1, PRKC   | 55 | 547  | 13528 |
| GOTERM_!GO:000759 | 3 | 5.454545 | 0.069116 | IL6, F3, F7  | 55 | 108  | 13528 |
| GOTERM_!GO:000268 | 4 | 7.272727 | 0.069337 | IL4, IL6, VE | 55 | 238  | 13528 |
| GOTERM_!GO:001046 | 2 | 3.636364 | 0.069506 | VEGFA, TP    | 55 | 18   | 13528 |
| GOTERM_!GO:000008 | 2 | 3.636364 | 0.069506 | E2F1, CDK2   | 55 | 18   | 13528 |
| GOTERM_!GO:001810 | 2 | 3.636364 | 0.069506 | PRKCA, BC    | 55 | 18   | 13528 |
| GOTERM_!GO:003059 | 2 | 3.636364 | 0.069506 | PRKCA, CC    | 55 | 18   | 13528 |
| GOTERM_!GO:000961 | 3 | 5.454545 | 0.070232 | IL6, BCL2, F | 55 | 109  | 13528 |
| GOTERM_!GO:000727 | 5 | 9.090909 | 0.072388 | CCNB1, PG    | 55 | 395  | 13528 |
| GOTERM_!GO:004259 | 2 | 3.636364 | 0.073226 | BCL2, ADR    | 55 | 19   | 13528 |
| GOTERM_!GO:000669 | 2 | 3.636364 | 0.073226 | PTGS2, PT    | 55 | 19   | 13528 |
| GOTERM_!GO:004848 | 2 | 3.636364 | 0.073226 | ERBB2, TP    | 55 | 19   | 13528 |
| GOTERM_!GO:000669 | 2 | 3.636364 | 0.073226 | PTGS2, PT    | 55 | 19   | 13528 |
| GOTERM_!GO:003106 | 2 | 3.636364 | 0.073226 | BCL2, TP63   | 55 | 19   | 13528 |
| GOTERM_!GO:003298 | 5 | 9.090909 | 0.073449 | PRKCA, ER    | 55 | 397  | 13528 |
| GOTERM_!GO:000840 | 3 | 5.454545 | 0.073618 | PGR, BCL2,   | 55 | 112  | 13528 |
| GOTERM_!GO:000862 | 3 | 5.454545 | 0.073618 | PRKCA, CA    | 55 | 112  | 13528 |
| GOTERM_!GO:000718 | 9 | 16.36364 | 0.075842 | ADRB2, CC    | 55 | 1123 | 13528 |
| GOTERM_!GO:005105 | 3 | 5.454545 | 0.075905 | IL4, JUN, C  | 55 | 114  | 13528 |
| GOTERM_!GO:006034 | 4 | 7.272727 | 0.076376 | PRKCA, IL6   | 55 | 248  | 13528 |
| GOTERM_!GO:005160 | 2 | 3.636364 | 0.07693  | IL6, BCL2    | 55 | 20   | 13528 |
| GOTERM_!GO:000018 | 2 | 3.636364 | 0.07693  | PRKCA, CA    | 55 | 20   | 13528 |
| GOTERM_!GO:004231 | 2 | 3.636364 | 0.07693  | ADRB2, CA    | 55 | 20   | 13528 |
| GOTERM_!GO:003057 | 2 | 3.636364 | 0.07693  | MMP2, MN     | 55 | 20   | 13528 |
| GOTERM_!GO:000150 | 3 | 5.454545 | 0.077056 | PTGS2, BCL   | 55 | 115  | 13528 |
| GOTERM_!GO:005512 | 2 | 3.636364 | 0.08062  | BCL2, TP63   | 55 | 21   | 13528 |
| GOTERM_!GO:003284 | 2 | 3.636364 | 0.08062  | BCL2, VEGI   | 55 | 21   | 13528 |
| GOTERM_!GO:004302 | 2 | 3.636364 | 0.08062  | CASP3, BC    | 55 | 21   | 13528 |
| GOTERM_!GO:004854 | 2 | 3.636364 | 0.08062  | BCL2, TP63   | 55 | 21   | 13528 |
| GOTERM_!GO:001821 | 2 | 3.636364 | 0.08062  | PRKCA, BC    | 55 | 21   | 13528 |
| GOTERM_!GO:000165 | 2 | 3.636364 | 0.08062  | ADRB2, PT    | 55 | 21   | 13528 |
| GOTERM_!GO:005131 | 2 | 3.636364 | 0.08062  | E2F1, CDK2   | 55 | 21   | 13528 |
| GOTERM_!GO:000267 | 2 | 3.636364 | 0.08062  | IL6, PPARG   | 55 | 21   | 13528 |
| GOTERM_!GO:000206 | 2 | 3.636364 | 0.08062  | PGR, TP63    | 55 | 21   | 13528 |



|                   |   |          |          |            |    |     |       |
|-------------------|---|----------|----------|------------|----|-----|-------|
| GOTERM_!GO:005079 | 2 | 3.636364 | 0.08062  | BCL2, TOP: | 55 | 21  | 13528 |
| GOTERM_!GO:004859 | 2 | 3.636364 | 0.08062  | CCNB1, BC  | 55 | 21  | 13528 |
| GOTERM_!GO:004269 | 3 | 5.454545 | 0.084082 | ERBB2, RXF | 55 | 121 | 13528 |
| GOTERM_!GO:000863 | 2 | 3.636364 | 0.084296 | BCL2, CASI | 55 | 22  | 13528 |
| GOTERM_!GO:000999 | 2 | 3.636364 | 0.084296 | CCNB1, BC  | 55 | 22  | 13528 |
| GOTERM_!GO:006034 | 3 | 5.454545 | 0.086466 | PTGS2, BCI | 55 | 123 | 13528 |
| GOTERM_!GO:004253 | 2 | 3.636364 | 0.087957 | IL4, IL6   | 55 | 23  | 13528 |
| GOTERM_!GO:004577 | 2 | 3.636364 | 0.087957 | ADRB2, AC  | 55 | 23  | 13528 |
| GOTERM_!GO:000012 | 4 | 7.272727 | 0.089809 | E2F1, RXR/ | 55 | 266 | 13528 |
| GOTERM_!GO:000726 | 6 | 10.90909 | 0.090249 | PRKCA, PG  | 55 | 600 | 13528 |
| GOTERM_!GO:000110 | 2 | 3.636364 | 0.091604 | CCL2, BCL2 | 55 | 24  | 13528 |
| GOTERM_!GO:003241 | 2 | 3.636364 | 0.091604 | ADRB2, CA  | 55 | 24  | 13528 |
| GOTERM_!GO:003476 | 2 | 3.636364 | 0.095237 | ADRB2, CA  | 55 | 25  | 13528 |
| GOTERM_!GO:004873 | 2 | 3.636364 | 0.095237 | BCL2, TP63 | 55 | 25  | 13528 |
| GOTERM_!GO:004424 | 2 | 3.636364 | 0.098855 | MMP2, MN   | 55 | 26  | 13528 |
| GOTERM_!GO:003026 | 2 | 3.636364 | 0.098855 | CASP3, TO  | 55 | 26  | 13528 |
| GOTERM_!GO:002289 | 2 | 3.636364 | 0.098855 | ADRB2, CA  | 55 | 26  | 13528 |
| GOTERM_!GO:004642 | 2 | 3.636364 | 0.098855 | IL4, IL6   | 55 | 26  | 13528 |
| GOTERM_!GO:000263 | 2 | 3.636364 | 0.098855 | IL4, IL6   | 55 | 26  | 13528 |
| GOTERM_!GO:004667 | 2 | 3.636364 | 0.098855 | PRKCA, CC  | 55 | 26  | 13528 |

| Fold Enrich | Bonferroni | Benjamini | FDR      |
|-------------|------------|-----------|----------|
| 7.81333     | 6.69E-13   | 6.69E-13  | 7.33E-13 |
| 6.730348    | 1.68E-09   | 8.42E-10  | 1.86E-09 |
| 6.664039    | 2.04E-09   | 6.79E-10  | 2.25E-09 |
| 6.639509    | 2.19E-09   | 5.47E-10  | 2.41E-09 |
| 10.09996    | 4.87E-09   | 9.73E-10  | 5.37E-09 |
| 6.822847    | 2.41E-08   | 4.02E-09  | 2.66E-08 |
| 15.37273    | 2.99E-07   | 4.28E-08  | 3.30E-07 |
| 9.109764    | 6.11E-07   | 7.63E-08  | 6.74E-07 |
| 28.38042    | 1.07E-06   | 1.19E-07  | 1.18E-06 |
| 9.382809    | 2.13E-06   | 2.13E-07  | 2.35E-06 |
| 26.04321    | 2.15E-06   | 1.96E-07  | 2.37E-06 |
| 5.453103    | 3.77E-06   | 3.15E-07  | 4.16E-06 |
| 5.895267    | 3.86E-06   | 2.97E-07  | 4.26E-06 |
| 9.718928    | 7.25E-06   | 5.18E-07  | 8.00E-06 |
| 9.660203    | 7.76E-06   | 5.17E-07  | 8.56E-06 |
| 7.205966    | 1.26E-05   | 7.87E-07  | 1.39E-05 |
| 9.032563    | 1.65E-05   | 9.68E-07  | 1.82E-05 |
| 12.52593    | 1.71E-05   | 9.49E-07  | 1.88E-05 |
| 8.906761    | 1.92E-05   | 1.01E-06  | 2.12E-05 |
| 8.88202     | 1.99E-05   | 9.93E-07  | 2.19E-05 |
| 18.29482    | 3.61E-05   | 1.72E-06  | 3.98E-05 |
| 24.90771    | 3.78E-05   | 1.72E-06  | 4.17E-05 |
| 6.295998    | 6.91E-05   | 3.00E-06  | 7.62E-05 |
| 47.60587    | 1.98E-04   | 8.27E-06  | 2.19E-04 |
| 3.916618    | 2.49E-04   | 9.98E-06  | 2.75E-04 |
| 13.92247    | 3.03E-04   | 1.16E-05  | 3.34E-04 |
| 9.171525    | 3.22E-04   | 1.19E-05  | 3.56E-04 |
| 8.755987    | 4.95E-04   | 1.77E-05  | 5.46E-04 |
| 38.83636    | 5.74E-04   | 1.98E-05  | 6.33E-04 |
| 23.91313    | 5.85E-04   | 1.95E-05  | 6.45E-04 |
| 5.720085    | 7.31E-04   | 2.36E-05  | 8.07E-04 |
| 5.131369    | 8.51E-04   | 2.66E-05  | 9.39E-04 |
| 5.635828    | 8.65E-04   | 2.62E-05  | 9.55E-04 |
| 5.095932    | 9.25E-04   | 2.72E-05  | 0.00102  |
| 11.90147    | 0.001003   | 2.87E-05  | 0.001107 |
| 11.90147    | 0.001003   | 2.87E-05  | 0.001107 |
| 6.864101    | 0.001238   | 3.44E-05  | 0.001366 |
| 6.816544    | 0.001325   | 3.58E-05  | 0.001463 |
| 6.03307     | 0.001326   | 3.49E-05  | 0.001464 |
| 6.785204    | 0.001387   | 3.56E-05  | 0.001531 |
| 32.08221    | 0.001529   | 3.82E-05  | 0.001688 |
| 7.494737    | 0.002047   | 5.00E-05  | 0.002261 |
| 10.7984     | 0.00209    | 4.98E-05  | 0.002308 |
| 5.669375    | 0.002547   | 5.93E-05  | 0.002814 |
| 7.292722    | 0.002619   | 5.96E-05  | 0.002893 |
| 7.234225    | 0.002816   | 6.27E-05  | 0.00311  |
| 7.12        | 0.003248   | 7.07E-05  | 0.003589 |
| 5.503489    | 0.00347    | 7.40E-05  | 0.003835 |
| 10.06215    | 0.003543   | 7.39E-05  | 0.003916 |
| 26.35325    | 0.004127   | 8.44E-05  | 0.004563 |
| 16.71598    | 0.004858   | 9.74E-05  | 0.005372 |
| 11.99823    | 0.005581   | 1.10E-04  | 0.006174 |
| 16.24288    | 0.005741   | 1.11E-04  | 0.006351 |
| 6.615159    | 0.006254   | 1.18E-04  | 0.00692  |
| 11.78269    | 0.006291   | 1.17E-04  | 0.006962 |
| 15.65223    | 0.007116   | 1.30E-04  | 0.007877 |
| 5.124242    | 0.007242   | 1.30E-04  | 0.008017 |

|          |          |          |          |
|----------|----------|----------|----------|
| 42.40752 | 0.007508 | 1.32E-04 | 0.008314 |
| 9.072429 | 0.007622 | 1.32E-04 | 0.00844  |
| 5.676084 | 0.007802 | 1.33E-04 | 0.00864  |
| 8.890252 | 0.008844 | 1.48E-04 | 0.0098   |
| 39.67155 | 0.009876 | 1.63E-04 | 0.010949 |
| 4.965104 | 0.009985 | 1.62E-04 | 0.01107  |
| 21.38814 | 0.011632 | 1.86E-04 | 0.012907 |
| 4.889185 | 0.011671 | 1.83E-04 | 0.01295  |
| 4.437488 | 0.012212 | 1.89E-04 | 0.013554 |
| 10.52251 | 0.0132   | 2.01E-04 | 0.014658 |
| 36.17112 | 0.014395 | 2.16E-04 | 0.015994 |
| 5.214777 | 0.017342 | 2.57E-04 | 0.019297 |
| 9.988371 | 0.018495 | 2.71E-04 | 0.020592 |
| 4.667923 | 0.018579 | 2.68E-04 | 0.020686 |
| 5.806009 | 0.01955  | 2.78E-04 | 0.021778 |
| 5.806009 | 0.01955  | 2.78E-04 | 0.021778 |
| 6.683794 | 0.019892 | 2.79E-04 | 0.022163 |
| 6.647666 | 0.020762 | 2.87E-04 | 0.023142 |
| 4.600759 | 0.02146  | 2.93E-04 | 0.023928 |
| 12.75367 | 0.022941 | 3.09E-04 | 0.025599 |
| 5.672117 | 0.023882 | 3.18E-04 | 0.026662 |
| 9.551986 | 0.02464  | 3.24E-04 | 0.027519 |
| 5.624948 | 0.025648 | 3.33E-04 | 0.028659 |
| 5.578557 | 0.027523 | 3.53E-04 | 0.030783 |
| 5.578557 | 0.027523 | 3.53E-04 | 0.030783 |
| 12.29818 | 0.028144 | 3.57E-04 | 0.031487 |
| 7.503975 | 0.030048 | 3.77E-04 | 0.033651 |
| 17.16025 | 0.033858 | 4.20E-04 | 0.037991 |
| 8.668322 | 0.04554  | 5.61E-04 | 0.051405 |
| 61.49091 | 0.047733 | 5.82E-04 | 0.053942 |
| 61.49091 | 0.047733 | 5.82E-04 | 0.053942 |
| 11.18017 | 0.04777  | 5.76E-04 | 0.053984 |
| 26.73518 | 0.04805  | 5.72E-04 | 0.054308 |
| 8.445103 | 0.053577 | 6.33E-04 | 0.060728 |
| 15.059   | 0.062725 | 7.36E-04 | 0.071436 |
| 10.49845 | 0.067306 | 7.83E-04 | 0.076837 |
| 8.097568 | 0.069419 | 7.99E-04 | 0.079337 |
| 6.627763 | 0.071296 | 8.12E-04 | 0.081563 |
| 14.6117  | 0.07214  | 8.14E-04 | 0.082565 |
| 4.425133 | 0.076724 | 8.58E-04 | 0.088024 |
| 51.78182 | 0.080494 | 8.92E-04 | 0.092533 |
| 51.78182 | 0.080494 | 8.92E-04 | 0.092533 |
| 51.78182 | 0.080494 | 8.92E-04 | 0.092533 |
| 14.05506 | 0.086236 | 9.49E-04 | 0.099437 |
| 49.19273 | 0.093758 | 0.001025 | 0.108547 |
| 49.19273 | 0.093758 | 0.001025 | 0.108547 |
| 21.96104 | 0.102023 | 0.001109 | 0.118642 |
| 46.85022 | 0.108219 | 0.001168 | 0.126271 |
| 19.21591 | 0.166246 | 0.001835 | 0.200373 |
| 8.784416 | 0.17057  | 0.001868 | 0.206098 |
| 18.63361 | 0.185374 | 0.002028 | 0.225922 |
| 11.80625 | 0.186354 | 0.00202  | 0.227248 |
| 11.52955 | 0.205902 | 0.002236 | 0.254011 |
| 147.5782 | 0.208563 | 0.002247 | 0.257703 |
| 8.398758 | 0.212612 | 0.002274 | 0.263347 |
| 17.82345 | 0.216328 | 0.002297 | 0.268552 |
| 11.0133  | 0.248531 | 0.002667 | 0.314706 |
| 10.93172 | 0.25608  | 0.002735 | 0.325809 |

|          |          |          |          |
|----------|----------|----------|----------|
| 10.77213 | 0.271548 | 0.002903 | 0.34891  |
| 5.347036 | 0.279748 | 0.002979 | 0.361355 |
| 16.39758 | 0.285893 | 0.003029 | 0.370771 |
| 122.9818 | 0.295292 | 0.00312  | 0.385333 |
| 16.18182 | 0.298395 | 0.003131 | 0.390182 |
| 15.97166 | 0.311131 | 0.003264 | 0.410311 |
| 15.97166 | 0.311131 | 0.003264 | 0.410311 |
| 3.689455 | 0.330077 | 0.003477 | 0.440945 |
| 30.74545 | 0.339074 | 0.003564 | 0.455795 |
| 15.37273 | 0.350632 | 0.003683 | 0.475166 |
| 15.18294 | 0.364187 | 0.00383  | 0.498324 |
| 28.9369  | 0.391532 | 0.004166 | 0.546566 |
| 14.81709 | 0.391798 | 0.004135 | 0.547045 |
| 7.326576 | 0.393381 | 0.004123 | 0.549905 |
| 9.645633 | 0.410602 | 0.004324 | 0.581496 |
| 4.353339 | 0.417984 | 0.004391 | 0.595318 |
| 14.46845 | 0.419974 | 0.004383 | 0.599074 |
| 3.286256 | 0.423509 | 0.004397 | 0.605776 |
| 3.286256 | 0.423509 | 0.004397 | 0.605776 |
| 13.81818 | 0.477507 | 0.005139 | 0.713556 |
| 13.81818 | 0.477507 | 0.005139 | 0.713556 |
| 13.51449 | 0.506588 | 0.005547 | 0.776261 |
| 6.778525 | 0.530415 | 0.005888 | 0.830422 |
| 4.719984 | 0.53162  | 0.005862 | 0.833234 |
| 3.721596 | 0.546994 | 0.006073 | 0.869738 |
| 4.670196 | 0.556752 | 0.006192 | 0.893548 |
| 12.67854 | 0.593353 | 0.006794 | 0.987731 |
| 8.530531 | 0.604362 | 0.006948 | 1.017703 |
| 12.54917 | 0.607553 | 0.006956 | 1.026546 |
| 12.42241 | 0.621631 | 0.007173 | 1.066424 |
| 4.545529 | 0.621842 | 0.007125 | 1.067034 |
| 4.545529 | 0.621842 | 0.007125 | 1.067034 |
| 5.289541 | 0.626743 | 0.007168 | 1.08127  |
| 22.88034 | 0.631785 | 0.007214 | 1.09611  |
| 3.999409 | 0.632842 | 0.007182 | 1.099244 |
| 12.29818 | 0.635569 | 0.007184 | 1.107378 |
| 12.29818 | 0.635569 | 0.007184 | 1.107378 |
| 12.29818 | 0.635569 | 0.007184 | 1.107378 |
| 73.78909 | 0.64635  | 0.007345 | 1.140134 |
| 6.215688 | 0.696301 | 0.008357 | 1.306058 |
| 8.064382 | 0.697483 | 0.008326 | 1.310305 |
| 6.193329 | 0.703086 | 0.008397 | 1.330658 |
| 7.849903 | 0.740699 | 0.009266 | 1.477987 |
| 20.49697 | 0.748629 | 0.009413 | 1.511739 |
| 6.020089 | 0.755192 | 0.009528 | 1.540479 |
| 7.726606 | 0.765221 | 0.009744 | 1.585899 |
| 7.686364 | 0.773136 | 0.009906 | 1.623126 |
| 61.49091 | 0.780626 | 0.010062 | 1.659552 |
| 7.646538 | 0.780917 | 0.010005 | 1.660992 |
| 2.358365 | 0.812562 | 0.010955 | 1.830084 |
| 10.69407 | 0.817907 | 0.011071 | 1.861413 |
| 18.92028 | 0.825323 | 0.011266 | 1.906414 |
| 56.76084 | 0.832767 | 0.011472 | 1.953534 |
| 18.56329 | 0.841875 | 0.011753 | 2.014086 |
| 10.33461 | 0.85538  | 0.012241 | 2.11054  |
| 18.21953 | 0.857361 | 0.01225  | 2.125439 |
| 52.70649 | 0.875232 | 0.013005 | 2.269862 |
| 2.306333 | 0.881206 | 0.013227 | 2.322743 |

|          |          |          |          |
|----------|----------|----------|----------|
| 6.994227 | 0.895342 | 0.013921 | 2.459164 |
| 49.19273 | 0.908883 | 0.014679 | 2.608146 |
| 49.19273 | 0.908883 | 0.014679 | 2.608146 |
| 16.96301 | 0.908906 | 0.014591 | 2.608411 |
| 4.513094 | 0.916575 | 0.015031 | 2.702858 |
| 9.533474 | 0.926012 | 0.015657 | 2.831614 |
| 9.46014  | 0.931348 | 0.016007 | 2.911816 |
| 5.297678 | 0.933449 | 0.016095 | 2.945104 |
| 6.617856 | 0.943798 | 0.01699  | 3.125894 |
| 15.86862 | 0.94521  | 0.017038 | 3.153094 |
| 15.86862 | 0.94521  | 0.017038 | 3.153094 |
| 9.246753 | 0.945646 | 0.016985 | 3.161617 |
| 9.177748 | 0.949869 | 0.017351 | 3.24799  |
| 15.61674 | 0.952215 | 0.017525 | 3.299133 |
| 15.61674 | 0.952215 | 0.017525 | 3.299133 |
| 15.61674 | 0.952215 | 0.017525 | 3.299133 |
| 6.501241 | 0.955469 | 0.017825 | 3.374343 |
| 15.13622 | 0.964084 | 0.018937 | 3.603238 |
| 5.078895 | 0.96498  | 0.018971 | 3.630094 |
| 40.99394 | 0.968737 | 0.019497 | 3.750667 |
| 14.90689 | 0.96905  | 0.019443 | 3.761352 |
| 14.90689 | 0.96905  | 0.019443 | 3.761352 |
| 5.034343 | 0.969901 | 0.019489 | 3.790954 |
| 8.722115 | 0.972773 | 0.01993  | 3.897329 |
| 14.6844  | 0.973438 | 0.019955 | 3.923534 |
| 4.990567 | 0.974263 | 0.020017 | 3.956985 |
| 14.46845 | 0.977297 | 0.020583 | 4.089807 |
| 14.46845 | 0.977297 | 0.020583 | 4.089807 |
| 6.174819 | 0.979615 | 0.021048 | 4.203684 |
| 14.25876 | 0.980677 | 0.02122  | 4.260187 |
| 14.25876 | 0.980677 | 0.02122  | 4.260187 |
| 36.89455 | 0.986193 | 0.022883 | 4.614508 |
| 36.89455 | 0.986193 | 0.022883 | 4.614508 |
| 4.822816 | 0.98696  | 0.023062 | 4.674624 |
| 35.13766 | 0.991102 | 0.024935 | 5.075763 |
| 35.13766 | 0.991102 | 0.024935 | 5.075763 |
| 35.13766 | 0.991102 | 0.024935 | 5.075763 |
| 8.090909 | 0.991162 | 0.024839 | 5.082787 |
| 13.11806 | 0.993282 | 0.026124 | 5.369608 |
| 4.653366 | 0.994369 | 0.026892 | 5.553564 |
| 5.764773 | 0.994663 | 0.027026 | 5.609462 |
| 4.61594  | 0.995435 | 0.027679 | 5.772081 |
| 32.08221 | 0.996523 | 0.028909 | 6.054678 |
| 32.08221 | 0.996523 | 0.028909 | 6.054678 |
| 7.686364 | 0.996601 | 0.028875 | 6.078089 |
| 7.686364 | 0.996601 | 0.028875 | 6.078089 |
| 5.632755 | 0.996903 | 0.029192 | 6.174404 |
| 30.74545 | 0.997891 | 0.030948 | 6.571412 |
| 11.85367 | 0.998719 | 0.033243 | 7.083968 |
| 11.71255 | 0.99898  | 0.034191 | 7.317254 |
| 11.71255 | 0.99898  | 0.034191 | 7.317254 |
| 7.277031 | 0.999    | 0.034118 | 7.337475 |
| 11.57476 | 0.999192 | 0.034977 | 7.554755 |
| 28.38042 | 0.999269 | 0.035288 | 7.65708  |
| 11.44017 | 0.999363 | 0.035771 | 7.796466 |
| 2.120376 | 0.999405 | 0.035923 | 7.866229 |
| 11.18017 | 0.999609 | 0.037735 | 8.292494 |
| 25.44451 | 0.999871 | 0.042753 | 9.408873 |

|          |          |          |          |
|----------|----------|----------|----------|
| 10.35636 | 0.999939 | 0.046051 | 10.15984 |
| 10.24848 | 0.999955 | 0.047152 | 10.44309 |
| 23.80293 | 0.999963 | 0.047906 | 10.65325 |
| 23.80293 | 0.999963 | 0.047906 | 10.65325 |
| 23.80293 | 0.999963 | 0.047906 | 10.65325 |
| 23.05909 | 0.999981 | 0.050664 | 11.29691 |
| 6.372115 | 0.999984 | 0.051112 | 11.44459 |
| 6.372115 | 0.999984 | 0.051112 | 11.44459 |
| 9.838545 | 0.999986 | 0.051668 | 11.61651 |
| 9.838545 | 0.999986 | 0.051668 | 11.61651 |
| 3.930926 | 0.999992 | 0.053668 | 12.10335 |
| 245.9636 | 0.999994 | 0.055027 | 12.45288 |
| 245.9636 | 0.999994 | 0.055027 | 12.45288 |
| 3.015903 | 0.999996 | 0.056438 | 12.81568 |
| 6.149091 | 0.999996 | 0.05634  | 12.84993 |
| 9.281647 | 0.999998 | 0.059026 | 13.49533 |
| 4.611818 | 0.999998 | 0.059558 | 13.67021 |
| 4.597451 | 0.999999 | 0.060031 | 13.83309 |
| 20.49697 | 0.999999 | 0.060534 | 14.00316 |
| 20.49697 | 0.999999 | 0.060534 | 14.00316 |
| 9.026188 | 0.999999 | 0.062447 | 14.4865  |
| 19.943   | 0.999999 | 0.06318  | 14.71014 |
| 19.943   | 0.999999 | 0.06318  | 14.71014 |
| 5.884298 | 1        | 0.063275 | 14.79266 |
| 8.944132 | 1        | 0.063142 | 14.82433 |
| 8.944132 | 1        | 0.063142 | 14.82433 |
| 8.863554 | 1        | 0.064392 | 15.16584 |
| 4.485659 | 1        | 0.064167 | 15.17747 |
| 1.796736 | 1        | 0.064155 | 15.23697 |
| 5.773794 | 1        | 0.065946 | 15.70428 |
| 18.92028 | 1        | 0.067666 | 16.15714 |
| 5.720085 | 1        | 0.067441 | 16.17102 |
| 8.630303 | 1        | 0.067338 | 16.21197 |
| 4.379175 | 1        | 0.068731 | 16.59472 |
| 8.409013 | 1        | 0.071486 | 17.28969 |
| 5.590083 | 1        | 0.071538 | 17.3692  |
| 5.590083 | 1        | 0.071538 | 17.3692  |
| 8.267685 | 1        | 0.074106 | 18.02518 |
| 163.9758 | 1        | 0.074067 | 18.08573 |
| 5.49026  | 1        | 0.074955 | 18.35938 |
| 5.49026  | 1        | 0.074955 | 18.35938 |
| 17.56883 | 1        | 0.074839 | 18.40285 |
| 17.56883 | 1        | 0.074839 | 18.40285 |
| 17.56883 | 1        | 0.074839 | 18.40285 |
| 17.56883 | 1        | 0.074839 | 18.40285 |
| 8.131029 | 1        | 0.076141 | 18.77385 |
| 17.16025 | 1        | 0.077545 | 19.16953 |
| 17.16025 | 1        | 0.077545 | 19.16953 |
| 5.370385 | 1        | 0.079248 | 19.63557 |
| 7.808369 | 1        | 0.083544 | 20.70075 |
| 16.39758 | 1        | 0.083328 | 20.72716 |
| 7.746886 | 1        | 0.08459  | 21.09521 |
| 7.746886 | 1        | 0.08459  | 21.09521 |
| 5.211094 | 1        | 0.085969 | 21.49145 |
| 5.211094 | 1        | 0.085969 | 21.49145 |
| 16.04111 | 1        | 0.085745 | 21.51716 |
| 7.51034  | 1        | 0.090522 | 22.7016  |
| 4.010277 | 1        | 0.090371 | 22.7475  |

|          |   |          |          |
|----------|---|----------|----------|
| 15.37273 | 1 | 0.091618 | 23.11721 |
| 15.37273 | 1 | 0.091618 | 23.11721 |
| 15.37273 | 1 | 0.091618 | 23.11721 |
| 15.37273 | 1 | 0.091618 | 23.11721 |
| 122.9818 | 1 | 0.092298 | 23.35653 |
| 122.9818 | 1 | 0.092298 | 23.35653 |
| 122.9818 | 1 | 0.092298 | 23.35653 |
| 122.9818 | 1 | 0.092298 | 23.35653 |
| 5.040238 | 1 | 0.09345  | 23.70606 |
| 7.342198 | 1 | 0.094079 | 23.93487 |
| 5.019666 | 1 | 0.093958 | 23.98956 |
| 5.019666 | 1 | 0.093958 | 23.98956 |
| 4.958944 | 1 | 0.097288 | 24.84858 |
| 14.46845 | 1 | 0.099987 | 25.56049 |
| 14.46845 | 1 | 0.099987 | 25.56049 |
| 4.899674 | 1 | 0.100301 | 25.72003 |
| 6.977692 | 1 | 0.105012 | 26.89837 |
| 6.977692 | 1 | 0.105012 | 26.89837 |
| 4.803977 | 1 | 0.105925 | 27.19883 |
| 13.92247 | 1 | 0.105598 | 27.21293 |
| 13.92247 | 1 | 0.105598 | 27.21293 |
| 13.66465 | 1 | 0.108805 | 28.04493 |
| 98.38545 | 1 | 0.109464 | 28.28853 |
| 98.38545 | 1 | 0.109464 | 28.28853 |
| 4.73007  | 1 | 0.109568 | 28.40432 |
| 13.17662 | 1 | 0.114865 | 29.71835 |
| 6.647666 | 1 | 0.11553  | 29.96584 |
| 12.94545 | 1 | 0.117699 | 30.55894 |
| 6.515593 | 1 | 0.120547 | 31.30717 |
| 6.430422 | 1 | 0.124076 | 32.20906 |
| 4.488388 | 1 | 0.126077 | 32.76237 |
| 3.069065 | 1 | 0.126154 | 32.87989 |
| 81.98788 | 1 | 0.12582  | 32.90349 |
| 12.29818 | 1 | 0.126208 | 33.09148 |
| 12.29818 | 1 | 0.126208 | 33.09148 |
| 12.29818 | 1 | 0.126208 | 33.09148 |
| 4.455863 | 1 | 0.127125 | 33.40043 |
| 12.09657 | 1 | 0.129044 | 33.93796 |
| 3.004791 | 1 | 0.135155 | 35.42263 |
| 11.71255 | 1 | 0.135626 | 35.6321  |
| 11.52955 | 1 | 0.138936 | 36.47905 |
| 11.52955 | 1 | 0.138936 | 36.47905 |
| 11.52955 | 1 | 0.138936 | 36.47905 |
| 70.27532 | 1 | 0.14179  | 37.22177 |
| 70.27532 | 1 | 0.14179  | 37.22177 |
| 70.27532 | 1 | 0.14179  | 37.22177 |
| 11.35217 | 1 | 0.141781 | 37.32545 |
| 5.926835 | 1 | 0.145162 | 38.18406 |
| 4.168875 | 1 | 0.151122 | 39.6055  |
| 10.85134 | 1 | 0.151776 | 39.85798 |
| 61.49091 | 1 | 0.157724 | 41.26241 |
| 61.49091 | 1 | 0.157724 | 41.26241 |
| 61.49091 | 1 | 0.157724 | 41.26241 |
| 61.49091 | 1 | 0.157724 | 41.26241 |
| 10.5413  | 1 | 0.158482 | 41.53757 |
| 10.5413  | 1 | 0.158482 | 41.53757 |
| 10.5413  | 1 | 0.158482 | 41.53757 |
| 10.39283 | 1 | 0.161846 | 42.37381 |

|          |   |          |          |
|----------|---|----------|----------|
| 10.39283 | 1 | 0.161846 | 42.37381 |
| 5.622026 | 1 | 0.161379 | 42.38543 |
| 10.10809 | 1 | 0.168591 | 44.03774 |
| 5.496394 | 1 | 0.169083 | 44.25581 |
| 5.465859 | 1 | 0.170754 | 44.723   |
| 5.465859 | 1 | 0.170754 | 44.723   |
| 5.376254 | 1 | 0.176886 | 46.12268 |
| 5.347036 | 1 | 0.178571 | 46.58841 |
| 3.855229 | 1 | 0.183113 | 47.64106 |
| 5.261254 | 1 | 0.184208 | 47.98234 |
| 9.46014  | 1 | 0.184384 | 48.13508 |
| 9.46014  | 1 | 0.184384 | 48.13508 |
| 9.46014  | 1 | 0.184384 | 48.13508 |
| 49.19273 | 1 | 0.185994 | 48.58099 |
| 49.19273 | 1 | 0.185994 | 48.58099 |
| 49.19273 | 1 | 0.185994 | 48.58099 |
| 49.19273 | 1 | 0.185994 | 48.58099 |
| 49.19273 | 1 | 0.185994 | 48.58099 |
| 9.340391 | 1 | 0.187191 | 48.94183 |
| 9.340391 | 1 | 0.187191 | 48.94183 |
| 9.340391 | 1 | 0.187191 | 48.94183 |
| 3.106909 | 1 | 0.189961 | 49.62135 |
| 9.109764 | 1 | 0.193944 | 50.54078 |
| 8.99867  | 1 | 0.197322 | 51.33256 |
| 44.72066 | 1 | 0.199546 | 51.89122 |
| 44.72066 | 1 | 0.199546 | 51.89122 |
| 44.72066 | 1 | 0.199546 | 51.89122 |
| 44.72066 | 1 | 0.199546 | 51.89122 |
| 44.72066 | 1 | 0.199546 | 51.89122 |
| 44.72066 | 1 | 0.199546 | 51.89122 |
| 44.72066 | 1 | 0.199546 | 51.89122 |
| 8.784416 | 1 | 0.204079 | 52.89973 |
| 4.943993 | 1 | 0.206466 | 53.48296 |
| 4.870567 | 1 | 0.212866 | 54.83239 |
| 40.99394 | 1 | 0.21306  | 54.98857 |
| 40.99394 | 1 | 0.21306  | 54.98857 |
| 40.99394 | 1 | 0.21306  | 54.98857 |
| 8.481505 | 1 | 0.213582 | 55.20676 |
| 8.481505 | 1 | 0.213582 | 55.20676 |
| 8.481505 | 1 | 0.213582 | 55.20676 |
| 8.385124 | 1 | 0.216948 | 55.96343 |
| 8.198788 | 1 | 0.224317 | 57.45736 |
| 8.198788 | 1 | 0.224317 | 57.45736 |
| 2.916565 | 1 | 0.225754 | 57.84112 |
| 37.84056 | 1 | 0.225356 | 57.88672 |
| 37.84056 | 1 | 0.225356 | 57.88672 |
| 37.84056 | 1 | 0.225356 | 57.88672 |
| 37.84056 | 1 | 0.225356 | 57.88672 |
| 37.84056 | 1 | 0.225356 | 57.88672 |
| 4.662818 | 1 | 0.229693 | 58.79856 |
| 4.662818 | 1 | 0.229693 | 58.79856 |
| 8.020553 | 1 | 0.229734 | 58.92447 |
| 7.934311 | 1 | 0.233079 | 59.64765 |
| 3.454545 | 1 | 0.233217 | 59.79054 |
| 35.13766 | 1 | 0.237077 | 60.59845 |
| 35.13766 | 1 | 0.237077 | 60.59845 |
| 35.13766 | 1 | 0.237077 | 60.59845 |
| 35.13766 | 1 | 0.237077 | 60.59845 |



[illegible]

[illegible]

| Category          | Term | Count | %        | PValue   | Genes        | List Total | Pop Hits | Pop Total |
|-------------------|------|-------|----------|----------|--------------|------------|----------|-----------|
| GOTERM_(GO:003198 |      | 18    | 32.72727 | 2.63E-05 | E2F1, EIF6,  | 52         | 1450     | 12782     |
| GOTERM_(GO:004323 |      | 20    | 36.36364 | 3.79E-05 | E2F1, EIF6,  | 52         | 1820     | 12782     |
| GOTERM_(GO:000579 |      | 8     | 14.54545 | 3.98E-05 | ADRB2, CY    | 52         | 237      | 12782     |
| GOTERM_(GO:004259 |      | 8     | 14.54545 | 4.80E-05 | ADRB2, CY    | 52         | 244      | 12782     |
| GOTERM_(GO:003197 |      | 20    | 36.36364 | 4.99E-05 | E2F1, EIF6,  | 52         | 1856     | 12782     |
| GOTERM_(GO:007001 |      | 19    | 34.54545 | 1.01E-04 | E2F1, EIF6,  | 52         | 1779     | 12782     |
| GOTERM_(GO:000565 |      | 13    | 23.63636 | 1.40E-04 | E2F1, CCN    | 52         | 882      | 12782     |
| GOTERM_(GO:000582 |      | 16    | 29.09091 | 1.43E-04 | PRKCA, CD    | 52         | 1330     | 12782     |
| GOTERM_(GO:000026 |      | 14    | 25.45455 | 2.44E-04 | PRKCA, CA    | 52         | 1083     | 12782     |
| GOTERM_(GO:004512 |      | 6     | 10.90909 | 2.54E-04 | PRKCA, AC    | 52         | 143      | 12782     |
| GOTERM_(GO:000562 |      | 12    | 21.81818 | 2.81E-04 | PRKCA, FO    | 52         | 809      | 12782     |
| GOTERM_(GO:000562 |      | 12    | 21.81818 | 3.84E-04 | PRKCA, FO    | 52         | 839      | 12782     |
| GOTERM_(GO:003042 |      | 5     | 9.090909 | 0.003658 | ADRB2, CH    | 52         | 159      | 12782     |
| GOTERM_(GO:003042 |      | 5     | 9.090909 | 0.003997 | ADRB2, CH    | 52         | 163      | 12782     |
| GOTERM_(GO:000587 |      | 3     | 5.454545 | 0.005916 | CDK1, BIRC   | 52         | 29       | 12782     |
| GOTERM_(GO:003122 |      | 12    | 21.81818 | 0.00742  | ADRB2, CA    | 52         | 1215     | 12782     |
| GOTERM_(GO:000563 |      | 5     | 9.090909 | 0.008918 | EIF6, PTGE   | 52         | 205      | 12782     |
| GOTERM_(GO:000566 |      | 5     | 9.090909 | 0.009685 | E2F1, E2F2   | 52         | 210      | 12782     |
| GOTERM_(GO:004323 |      | 4     | 7.272727 | 0.011054 | ADRB2, IL6   | 52         | 116      | 12782     |
| GOTERM_(GO:004300 |      | 6     | 10.90909 | 0.011426 | ADRB2, CH    | 52         | 342      | 12782     |
| GOTERM_(GO:000581 |      | 5     | 9.090909 | 0.01206  | CCNB1, BIF   | 52         | 224      | 12782     |
| GOTERM_(GO:001632 |      | 4     | 7.272727 | 0.015947 | ADRB2, CA    | 52         | 133      | 12782     |
| GOTERM_(GO:004521 |      | 4     | 7.272727 | 0.016591 | CHRM3, EF    | 52         | 135      | 12782     |
| GOTERM_(GO:000588 |      | 11    | 20       | 0.017445 | ADRB2, CA    | 52         | 1188     | 12782     |
| GOTERM_(GO:000581 |      | 5     | 9.090909 | 0.018101 | CCNB1, BIF   | 52         | 253      | 12782     |
| GOTERM_(GO:000590 |      | 3     | 5.454545 | 0.018227 | ADRB2, CA    | 52         | 52       | 12782     |
| GOTERM_(GO:000561 |      | 8     | 14.54545 | 0.018285 | IL4, IL6, CC | 52         | 685      | 12782     |
| GOTERM_(GO:000595 |      | 2     | 3.636364 | 0.019794 | BCL2, PPP3   | 52         | 5        | 12782     |
| GOTERM_(GO:000573 |      | 8     | 14.54545 | 0.020062 | EIF6, FOS, I | 52         | 698      | 12782     |
| GOTERM_(GO:004445 |      | 16    | 29.09091 | 0.021919 | CAV1, IL6,   | 52         | 2203     | 12782     |
| GOTERM_(GO:000022 |      | 4     | 7.272727 | 0.026707 | JUN, BIRC5   | 52         | 162      | 12782     |
| GOTERM_(GO:000588 |      | 23    | 41.81818 | 0.026758 | PRKCA, CA    | 52         | 3777     | 12782     |
| GOTERM_(GO:004517 |      | 4     | 7.272727 | 0.03444  | ADRB2, CA    | 52         | 179      | 12782     |
| GOTERM_(GO:001250 |      | 8     | 14.54545 | 0.034567 | EIF6, CAV1   | 52         | 782      | 12782     |
| GOTERM_(GO:004442 |      | 9     | 16.36364 | 0.035053 | IL4, IL6, CC | 52         | 960      | 12782     |
| GOTERM_(GO:003227 |      | 2     | 3.636364 | 0.035353 | CHRM3, CI    | 52         | 9        | 12782     |
| GOTERM_(GO:000562 |      | 5     | 9.090909 | 0.035825 | CAV1, SLC    | 52         | 313      | 12782     |
| GOTERM_(GO:003196 |      | 7     | 12.72727 | 0.035934 | EIF6, PTGE   | 52         | 620      | 12782     |
| GOTERM_(GO:003197 |      | 7     | 12.72727 | 0.036419 | EIF6, PTGE   | 52         | 622      | 12782     |
| GOTERM_(GO:001989 |      | 6     | 10.90909 | 0.046234 | PRKCA, CY    | 52         | 494      | 12782     |
| GOTERM_(GO:000574 |      | 3     | 5.454545 | 0.050039 | BCL2, MAC    | 52         | 90       | 12782     |
| GOTERM_(GO:004320 |      | 2     | 3.636364 | 0.054461 | BCL2, ERBB   | 52         | 14       | 12782     |
| GOTERM_(GO:004299 |      | 7     | 12.72727 | 0.057751 | ADRB2, CH    | 52         | 697      | 12782     |
| GOTERM_(GO:000029 |      | 2     | 3.636364 | 0.062    | CAV1, SLC    | 52         | 16       | 12782     |
| GOTERM_(GO:003196 |      | 3     | 5.454545 | 0.064623 | BCL2, MAC    | 52         | 104      | 12782     |
| GOTERM_(GO:001563 |      | 6     | 10.90909 | 0.066806 | CCNB1, CC    | 52         | 549      | 12782     |
| GOTERM_(GO:001986 |      | 3     | 5.454545 | 0.069025 | BCL2, MAC    | 52         | 108      | 12782     |
| GOTERM_(GO:004445 |      | 6     | 10.90909 | 0.069319 | E2F1, E2F2   | 52         | 555      | 12782     |
| GOTERM_(GO:003049 |      | 2     | 3.636364 | 0.06948  | CDK1, BIRC   | 52         | 18       | 12782     |
| GOTERM_(GO:004445 |      | 4     | 7.272727 | 0.074765 | CHRM3, EF    | 52         | 246      | 12782     |
| GOTERM_(GO:000992 |      | 2     | 3.636364 | 0.098819 | CAV1, ERB    | 52         | 26       | 12782     |

| Fold Enrich | Bonferroni | Benjamini | FDR      |
|-------------|------------|-----------|----------|
| 3.051406    | 0.004898   | 0.004898  | 0.032544 |
| 2.701183    | 0.007058   | 0.003535  | 0.046944 |
| 8.297306    | 0.007424   | 0.002481  | 0.049383 |
| 8.059269    | 0.008927   | 0.002239  | 0.059424 |
| 2.64879     | 0.009295   | 0.001866  | 0.061887 |
| 2.625265    | 0.018717   | 0.003144  | 0.125171 |
| 3.623016    | 0.025758   | 0.003721  | 0.172836 |
| 2.957085    | 0.026416   | 0.003341  | 0.177307 |
| 3.177569    | 0.04461    | 0.005058  | 0.302057 |
| 10.31361    | 0.046351   | 0.004735  | 0.314105 |
| 3.646097    | 0.051175   | 0.004764  | 0.347613 |
| 3.515724    | 0.069342   | 0.005971  | 0.475235 |
| 7.729802    | 0.496069   | 0.051351  | 4.441208 |
| 7.540113    | 0.527151   | 0.052093  | 4.843621 |
| 25.42838    | 0.670274   | 0.071297  | 7.090699 |
| 2.42773     | 0.75159    | 0.083362  | 8.818511 |
| 5.99531     | 0.812704   | 0.093835  | 10.50948 |
| 5.852564    | 0.837966   | 0.096165  | 11.36484 |
| 8.476127    | 0.874903   | 0.103631  | 12.87194 |
| 4.312416    | 0.883402   | 0.10188   | 13.27739 |
| 5.486779    | 0.896581   | 0.102414  | 13.96417 |
| 7.392713    | 0.950518   | 0.127718  | 18.06735 |
| 7.283191    | 0.956217   | 0.127177  | 18.72928 |
| 2.275997    | 0.962787   | 0.128142  | 19.60042 |
| 4.85786     | 0.967152   | 0.127711  | 20.26263 |
| 14.18121    | 0.96793    | 0.123923  | 20.38921 |
| 2.870747    | 0.968282   | 0.119979  | 20.44744 |
| 98.32308    | 0.976215   | 0.124994  | 21.95085 |
| 2.81728     | 0.977397   | 0.1225    | 22.21411 |
| 1.785258    | 0.984149   | 0.129032  | 24.02245 |
| 6.069326    | 0.993668   | 0.150658  | 28.50611 |
| 1.496843    | 0.99373    | 0.146574  | 28.55256 |
| 5.492909    | 0.998575   | 0.180124  | 35.23772 |
| 2.514657    | 0.99861    | 0.175915  | 35.34268 |
| 2.304447    | 0.998735   | 0.173575  | 35.74549 |
| 54.62393    | 0.998806   | 0.170526  | 35.99229 |
| 3.92664     | 0.998911   | 0.168384  | 36.37941 |
| 2.775248    | 0.998934   | 0.164805  | 36.46881 |
| 2.766325    | 0.999029   | 0.162961  | 36.86376 |
| 2.985519    | 0.999857   | 0.198523  | 44.38858 |
| 8.19359     | 0.999932   | 0.208746  | 47.07743 |
| 35.11538    | 0.999972   | 0.22068   | 50.05127 |
| 2.468657    | 0.999985   | 0.227942  | 52.16366 |
| 30.72596    | 0.999994   | 0.238162  | 54.76969 |
| 7.090607    | 0.999996   | 0.242413  | 56.31316 |
| 2.686423    | 0.999998   | 0.24503   | 57.56    |
| 6.827991    | 0.999998   | 0.247662  | 58.79431 |
| 2.65738     | 0.999999   | 0.244121  | 58.9555  |
| 27.31197    | 0.999999   | 0.24029   | 59.04303 |
| 3.996873    | 1          | 0.252206  | 61.83547 |
| 18.90828    | 1          | 0.317173  | 72.46702 |

| Category | Term      | Count | %        | PValue   | Genes                  | List Total | Pop Hits | Pop Total |
|----------|-----------|-------|----------|----------|------------------------|------------|----------|-----------|
| GOTERM_  | GO:000487 | 6     | 10.90909 | 3.00E-06 | PGR, PTGE              | 52         | 58       | 12983     |
| GOTERM_  | GO:004698 | 12    | 21.81818 | 6.32E-06 | FOS, ADRE              | 52         | 542      | 12983     |
| GOTERM_  | GO:004698 | 8     | 14.54545 | 1.56E-05 | FOS, ERBB2             | 52         | 208      | 12983     |
| GOTERM_  | GO:000822 | 5     | 9.090909 | 1.92E-05 | ADRB2, CH              | 52         | 41       | 12983     |
| GOTERM_  | GO:004280 | 12    | 21.81818 | 3.00E-05 | ADRB2, CA              | 52         | 640      | 12983     |
| GOTERM_  | GO:000828 | 10    | 18.18182 | 5.55E-05 | PRKCA, PG              | 52         | 450      | 12983     |
| GOTERM_  | GO:000814 | 5     | 9.090909 | 7.16E-05 | ADRB2, CH              | 52         | 57       | 12983     |
| GOTERM_  | GO:000467 | 10    | 18.18182 | 5.19E-04 | PRKCA, CD              | 52         | 606      | 12983     |
| GOTERM_  | GO:000493 | 3     | 5.454545 | 6.67E-04 | ADRB2, AC              | 52         | 10       | 12983     |
| GOTERM_  | GO:000370 | 4     | 7.272727 | 9.26E-04 | PGR, RXRA              | 52         | 49       | 12983     |
| GOTERM_  | GO:000370 | 12    | 21.81818 | 0.001186 | E2F1, PGR,             | 52         | 975      | 12983     |
| GOTERM_  | GO:004280 | 7     | 12.72727 | 0.001882 | ADRB2, ER              | 52         | 334      | 12983     |
| GOTERM_  | GO:000549 | 4     | 7.272727 | 0.00201  | PGR, CAV1              | 52         | 64       | 12983     |
| GOTERM_  | GO:001989 | 8     | 14.54545 | 0.004114 | ADRB2, CA              | 52         | 523      | 12983     |
| GOTERM_  | GO:003052 | 14    | 25.45455 | 0.004669 | E2F1, E2F2             | 52         | 1512     | 12983     |
| GOTERM_  | GO:000369 | 4     | 7.272727 | 0.006496 | FOS, JUN, I            | 52         | 97       | 12983     |
| GOTERM_  | GO:000512 | 5     | 9.090909 | 0.007112 | IL4, IL6, CC           | 52         | 195      | 12983     |
| GOTERM_  | GO:000466 | 2     | 3.636364 | 0.007841 | PTGS2, PTG             | 52         | 2        | 12983     |
| GOTERM_  | GO:004356 | 8     | 14.54545 | 0.00913  | PGR, FOS,              | 52         | 607      | 12983     |
| GOTERM_  | GO:000813 | 7     | 12.72727 | 0.014754 | E2F1, E2F2             | 52         | 513      | 12983     |
| GOTERM_  | GO:004356 | 4     | 7.272727 | 0.019228 | FOS, JUN, I            | 52         | 145      | 12983     |
| GOTERM_  | GO:000498 | 2     | 3.636364 | 0.01949  | CHRM3, CI              | 52         | 5        | 12983     |
| GOTERM_  | GO:001690 | 2     | 3.636364 | 0.01949  | CHRM3, CI              | 52         | 5        | 12983     |
| GOTERM_  | GO:001084 | 3     | 5.454545 | 0.021042 | FOS, JUN, I            | 52         | 57       | 12983     |
| GOTERM_  | GO:001624 | 3     | 5.454545 | 0.022447 | ADRB2, AC              | 52         | 59       | 12983     |
| GOTERM_  | GO:000493 | 2     | 3.636364 | 0.023343 | ADRA2A, A              | 52         | 6        | 12983     |
| GOTERM_  | GO:000467 | 6     | 10.90909 | 0.026242 | PRKCA, CD              | 52         | 430      | 12983     |
| GOTERM_  | GO:003107 | 3     | 5.454545 | 0.034143 | CDK1, ERB              | 52         | 74       | 12983     |
| GOTERM_  | GO:000495 | 2     | 3.636364 | 0.034814 | PTGER3, PI             | 52         | 9        | 12983     |
| GOTERM_  | GO:007041 | 2     | 3.636364 | 0.038608 | FOS, JUN               | 52         | 10       | 12983     |
| GOTERM_  | GO:000495 | 2     | 3.636364 | 0.038608 | PTGER3, PI             | 52         | 10       | 12983     |
| GOTERM_  | GO:000495 | 2     | 3.636364 | 0.038608 | PTGER3, PI             | 52         | 10       | 12983     |
| GOTERM_  | GO:005187 | 2     | 3.636364 | 0.038608 | ERBB2, AH              | 52         | 10       | 12983     |
| GOTERM_  | GO:000469 | 2     | 3.636364 | 0.05736  | PRKCA, PR              | 52         | 15       | 12983     |
| GOTERM_  | GO:000417 | 5     | 9.090909 | 0.059199 | CASP3, CA              | 52         | 375      | 12983     |
| GOTERM_  | GO:004691 | 17    | 30.90909 | 0.063973 | PRKCA, CY              | 52         | 2785     | 12983     |
| GOTERM_  | GO:000550 | 8     | 14.54545 | 0.06642  | PRKCA, F7,             | 52         | 919      | 12983     |
| GOTERM_  | GO:001546 | 2     | 3.636364 | 0.068439 | CHRM3, CI              | 52         | 18       | 12983     |
| GOTERM_  | GO:004317 | 3     | 5.454545 | 0.069361 | ADRB2, CH              | 52         | 110      | 12983     |
| GOTERM_  | GO:000370 | 4     | 7.272727 | 0.070709 | E2F2, FOS,             | 52         | 244      | 12983     |
| GOTERM_  | GO:000202 | 2     | 3.636364 | 0.072103 | BCL2, F3               | 52         | 19       | 12983     |
| GOTERM_  | GO:001656 | 5     | 9.090909 | 0.076769 | E2F1, BCL2             | 52         | 410      | 12983     |
| GOTERM_  | GO:004216 | 2     | 3.636364 | 0.07939  | CHRM3, CI              | 52         | 21       | 12983     |
| GOTERM_  | GO:002003 | 3     | 5.454545 | 0.08177  | CYP1B1, P <sup>-</sup> | 52         | 121      | 12983     |
| GOTERM_  | GO:004690 | 3     | 5.454545 | 0.091194 | CYP1B1, P <sup>-</sup> | 52         | 129      | 12983     |

| Fold Enrich | Bonferroni | Benjamini | FDR      |
|-------------|------------|-----------|----------|
| 25.82825    | 7.97E-04   | 7.97E-04  | 0.00393  |
| 5.527817    | 0.00168    | 8.40E-04  | 0.00829  |
| 9.602811    | 0.004139   | 0.001382  | 0.020453 |
| 30.44794    | 0.005098   | 0.001277  | 0.0252   |
| 4.68137     | 0.007958   | 0.001597  | 0.039392 |
| 5.548291    | 0.014661   | 0.002459  | 0.072807 |
| 21.90115    | 0.018853   | 0.002715  | 0.093816 |
| 4.120018    | 0.129067   | 0.017125  | 0.679162 |
| 74.90192    | 0.162679   | 0.019534  | 0.87175  |
| 20.38148    | 0.218484   | 0.024351  | 1.208341 |
| 3.072899    | 0.270684   | 0.028287  | 1.54455  |
| 5.232669    | 0.394119   | 0.040896  | 2.440737 |
| 15.60457    | 0.414432   | 0.040331  | 2.604661 |
| 3.819091    | 0.665971   | 0.075335  | 5.263875 |
| 2.311788    | 0.712029   | 0.079642  | 5.954505 |
| 10.2958     | 0.823333   | 0.10268   | 8.193436 |
| 6.401874    | 0.8502     | 0.105664  | 8.937255 |
| 249.6731    | 0.876807   | 0.109822  | 9.811208 |
| 3.290584    | 0.91281    | 0.120501  | 11.33553 |
| 3.406845    | 0.980816   | 0.179372  | 17.71449 |
| 6.887533    | 0.994284   | 0.218023  | 22.48403 |
| 99.86923    | 0.994676   | 0.211784  | 22.75534 |
| 99.86923    | 0.994676   | 0.211784  | 22.75534 |
| 13.14069    | 0.996507   | 0.218045  | 24.34405 |
| 12.69524    | 0.997616   | 0.222461  | 25.75556 |
| 83.22436    | 0.998132   | 0.222226  | 26.64378 |
| 3.48381     | 0.999153   | 0.238193  | 29.44888 |
| 10.12188    | 0.999903   | 0.289826  | 36.59938 |
| 55.48291    | 0.999919   | 0.285825  | 37.17507 |
| 49.93462    | 0.999972   | 0.303123  | 40.33858 |
| 49.93462    | 0.999972   | 0.303123  | 40.33858 |
| 49.93462    | 0.999972   | 0.303123  | 40.33858 |
| 49.93462    | 0.999972   | 0.303123  | 40.33858 |
| 33.28974    | 1          | 0.407713  | 53.92393 |
| 3.328974    | 1          | 0.407631  | 55.08924 |
| 1.524037    | 1          | 0.422791  | 57.98854 |
| 2.173433    | 1          | 0.42535   | 59.40644 |
| 27.74145    | 1          | 0.42572   | 60.54303 |
| 6.809266    | 1          | 0.420921  | 61.05218 |
| 4.093001    | 1          | 0.418329  | 61.78568 |
| 26.28138    | 1          | 0.416087  | 62.53121 |
| 3.044794    | 1          | 0.428296  | 64.92884 |
| 23.77839    | 1          | 0.431176  | 66.21248 |
| 6.190242    | 1          | 0.432942  | 67.34049 |
| 5.806351    | 1          | 0.462263  | 71.47402 |
