# Supplementary material for: Network Pharmacology-Based Study on the Active Component and Mechanism of the Anti-Non-Invasive and Invasive Bladder Urothelial Carcinoma Effects of Zhuling Jisheng Decoction
Source: Hindawi journal article supplement (doi:10.1155/2021/7667707), 2021-12-31
Supplement: f1 [file 7667707.f1.zip]

| ID       | Descriptor          | GeneRatio | BgRatio  | pvalue   | p.adjust | qvalue   | geneID      | Count |
|----------|---------------------|-----------|----------|----------|----------|----------|-------------|-------|
| hsa04668 | TNF signal          | 17/65     | 112/8016 | 9.06E-18 | 1.84E-15 | 6.77E-16 | PTGS2/JUN   | 17    |
| hsa04933 | AGE-RAGE            | 15/65     | 100/8016 | 1.16E-15 | 1.18E-13 | 4.35E-14 | BCL2/JUN/   | 15    |
| hsa04657 | IL-17 signa         | 13/65     | 94/8016  | 3.37E-13 | 2.28E-11 | 8.40E-12 | PTGS2/JUN   | 13    |
| hsa04625 | C-type lect         | 12/65     | 104/8016 | 2.71E-11 | 1.38E-09 | 5.07E-10 | PTGS2/JUN   | 12    |
| hsa05161 | Hepatitis B         | 13/65     | 162/8016 | 3.83E-10 | 1.40E-08 | 5.16E-09 | BCL2/JUN/   | 13    |
| hsa04064 | NF-kappa            | 11/65     | 102/8016 | 4.14E-10 | 1.40E-08 | 5.16E-09 | PTGS2/BCL   | 11    |
| hsa05170 | Human im            | 14/65     | 212/8016 | 9.89E-10 | 2.87E-08 | 1.06E-08 | BCL2/JUN/   | 14    |
| hsa05167 | Kaposi sarc         | 13/65     | 186/8016 | 2.13E-09 | 4.87E-08 | 1.79E-08 | PTGS2/JUN   | 13    |
| hsa05163 | Human cyt           | 14/65     | 225/8016 | 2.16E-09 | 4.87E-08 | 1.79E-08 | PTGS2/CAS   | 14    |
| hsa05142 | Chagas dis          | 10/65     | 102/8016 | 7.13E-09 | 1.45E-07 | 5.33E-08 | JUN/CASPI   | 10    |
| hsa04659 | Th17 cell d         | 10/65     | 107/8016 | 1.14E-08 | 2.10E-07 | 7.74E-08 | RXRA/JUN,   | 10    |
| hsa05143 | African try         | 7/65      | 37/8016  | 1.41E-08 | 2.38E-07 | 8.77E-08 | PRKCA/IL6   | 7     |
| hsa04380 | Osteoclast          | 10/65     | 128/8016 | 6.44E-08 | 1.01E-06 | 3.70E-07 | JUN/PPAR    | 10    |
| hsa05164 | Influenza A         | 11/65     | 170/8016 | 9.38E-08 | 1.36E-06 | 5.01E-07 | CASP8/PR    | 11    |
| hsa04620 | Toll-like re        | 9/65      | 104/8016 | 1.28E-07 | 1.67E-06 | 6.16E-07 | JUN/CASPI   | 9     |
| hsa05162 | Measles             | 10/65     | 138/8016 | 1.32E-07 | 1.67E-06 | 6.16E-07 | BCL2/JUN/   | 10    |
| hsa05140 | Leishmani           | 8/65      | 77/8016  | 1.63E-07 | 1.94E-06 | 7.15E-07 | PTGS2/JUN   | 8     |
| hsa04621 | NOD-like            | 11/65     | 181/8016 | 1.78E-07 | 2.01E-06 | 7.39E-07 | BCL2/JUN/   | 11    |
| hsa04662 | B cell rece         | 8/65      | 82/8016  | 2.67E-07 | 2.85E-06 | 1.05E-06 | JUN/RELA/   | 8     |
| hsa05135 | Yersinia inf        | 9/65      | 120/8016 | 4.42E-07 | 4.48E-06 | 1.65E-06 | JUN/RELA/   | 9     |
| hsa05323 | Rheumatoi           | 8/65      | 93/8016  | 7.11E-07 | 6.87E-06 | 2.53E-06 | JUN/MMP     | 8     |
| hsa05031 | Amphetar            | 7/65      | 69/8016  | 1.20E-06 | 1.06E-05 | 3.92E-06 | MAOB/JUN    | 7     |
| hsa05166 | Human T-<br>(11/65) |           | 219/8016 | 1.21E-06 | 1.06E-05 | 3.92E-06 | JUN/RELA/   | 11    |
| hsa04210 | Apoptosis           | 9/65      | 136/8016 | 1.28E-06 | 1.08E-05 | 3.98E-06 | BCL2/JUN/   | 9     |
| hsa05146 | Amoebiasi           | 8/65      | 102/8016 | 1.45E-06 | 1.17E-05 | 4.32E-06 | PRKCA/REI   | 8     |
| hsa05133 | Pertussis           | 7/65      | 76/8016  | 2.33E-06 | 1.82E-05 | 6.70E-06 | JUN/RELA/   | 7     |
| hsa05144 | Malaria             | 6/65      | 50/8016  | 2.70E-06 | 2.03E-05 | 7.48E-06 | IL6/ICAM1   | 6     |
| hsa04020 | Calcium sig         | 10/65     | 193/8016 | 2.94E-06 | 2.13E-05 | 7.84E-06 | CHRM3/CH    | 10    |
| hsa05169 | Epstein-Ba          | 10/65     | 201/8016 | 4.23E-06 | 2.93E-05 | 1.08E-05 | BCL2/JUN/   | 10    |
| hsa01523 | Antifolate          | 5/65      | 31/8016  | 4.33E-06 | 2.93E-05 | 1.08E-05 | RELA/IL6/II | 5     |
| hsa04218 | Cellular ser        | 9/65      | 160/8016 | 4.93E-06 | 3.23E-05 | 1.19E-05 | RELA/IL6/C  | 9     |
| hsa05134 | Legionello          | 6/65      | 57/8016  | 5.90E-06 | 3.74E-05 | 1.38E-05 | CASP8/REL   | 6     |
| hsa05235 | PD-L1 exp           | 7/65      | 89/8016  | 6.77E-06 | 4.16E-05 | 1.53E-05 | JUN/RELA/   | 7     |
| hsa05132 | Salmonella          | 10/65     | 214/8016 | 7.39E-06 | 4.41E-05 | 1.63E-05 | BCL2/JUN/   | 10    |
| hsa04658 | Th1 and Th          | 7/65      | 92/8016  | 8.44E-06 | 4.64E-05 | 1.71E-05 | JUN/RELA/   | 7     |
| hsa05222 | Small cell          | 7/65      | 92/8016  | 8.44E-06 | 4.64E-05 | 1.71E-05 | PTGS2/RXF   | 7     |
| hsa04926 | Relaxin sig         | 8/65      | 129/8016 | 8.46E-06 | 4.64E-05 | 1.71E-05 | JUN/PRKC    | 8     |
| hsa04623 | Cytosolic           | 6/65      | 63/8016  | 1.06E-05 | 5.68E-05 | 2.09E-05 | RELA/IL6/PI | 6     |
| hsa05215 | Prostate ca         | 7/65      | 97/8016  | 1.20E-05 | 6.24E-05 | 2.30E-05 | BCL2/MMF    | 7     |
| hsa05221 | Acute myel          | 6/65      | 67/8016  | 1.52E-05 | 7.73E-05 | 2.85E-05 | RELA/RUN    | 6     |
| hsa05202 | Transcripti         | 9/65      | 186/8016 | 1.67E-05 | 8.29E-05 | 3.05E-05 | RXRA/PPA    | 9     |
| hsa04920 | Adipocytol          | 6/65      | 69/8016  | 1.81E-05 | 8.73E-05 | 3.22E-05 | RXRA/RELA   | 6     |
| hsa04660 | T cell rece         | 7/65      | 104/8016 | 1.90E-05 | 8.95E-05 | 3.30E-05 | JUN/RELA/   | 7     |
| hsa05120 | Epithelial          | 6/65      | 70/8016  | 1.96E-05 | 9.06E-05 | 3.34E-05 | JUN/RELA/   | 6     |
| hsa04010 | MAPK sign           | 11/65     | 295/8016 | 2.11E-05 | 9.53E-05 | 3.51E-05 | JUN/PRKC    | 11    |
| hsa04115 | p53 signali         | 6/65      | 72/8016  | 2.31E-05 | 0.000102 | 3.75E-05 | BCL2/CASF   | 6     |
| hsa05130 | Pathogenic          | 9/65      | 202/8016 | 3.23E-05 | 0.000139 | 5.14E-05 | JUN/CASPI   | 9     |
| hsa04970 | Salivary ser        | 6/65      | 90/8016  | 8.22E-05 | 0.000348 | 0.000128 | CHRM3/AL    | 6     |
| hsa04151 | PI3K-Akt s          | 11/65     | 354/8016 | 0.000112 | 0.000462 | 0.00017  | RXRA/CHR    | 11    |
| hsa04062 | Chemokin            | 8/65      | 189/8016 | 0.000132 | 0.000534 | 0.000197 | RELA/NFKB   | 8     |
| hsa04932 | Non-alcohol         | 7/65      | 149/8016 | 0.000188 | 0.000748 | 0.000276 | RXRA/JUN,   | 7     |
| hsa04921 | Oxytocin s          | 7/65      | 153/8016 | 0.000222 | 0.000864 | 0.000318 | PTGS2/JUN   | 7     |
| hsa04931 | Insulin resi        | 6/65      | 108/8016 | 0.000225 | 0.000864 | 0.000318 | RELA/IL6/PI | 6     |
| hsa04622 | RIG-I-like          | 5/65      | 70/8016  | 0.000242 | 0.000909 | 0.000335 | CASP8/REL   | 5     |
| hsa04670 | Leukocyte           | 6/65      | 112/8016 | 0.000275 | 0.000979 | 0.00036  | PRKCA/MM    | 6     |
| hsa04725 | Cholinergic         | 6/65      | 112/8016 | 0.000275 | 0.000979 | 0.00036  | CHRM3/CH    | 6     |
| hsa05145 | Toxoplasma          | 6/65      | 112/8016 | 0.000275 | 0.000979 | 0.00036  | BCL2/CASF   | 6     |

|          |                               |      |          |          |          |          |           |   |
|----------|-------------------------------|------|----------|----------|----------|----------|-----------|---|
| hsa04726 | Serotonergic                  | 6/65 | 115/8016 | 0.000317 | 0.00111  | 0.000409 | PTGS1/PTC | 6 |
| hsa04722 | Neurotrophin                  | 6/65 | 119/8016 | 0.000381 | 0.001312 | 0.000483 | BCL2/JUN/ | 6 |
| hsa01521 | EGFR tyrosine                 | 5/65 | 79/8016  | 0.000426 | 0.001441 | 0.00053  | BCL2/PRKC | 5 |
| hsa05204 | Chemical chaperone            | 5/65 | 82/8016  | 0.000506 | 0.001684 | 0.00062  | PTGS2/AD  | 5 |
| hsa05131 | Shigellosis                   | 8/65 | 236/8016 | 0.000594 | 0.001916 | 0.000705 | BCL2/JUN/ | 8 |
| hsa05152 | Tuberculosis                  | 7/65 | 180/8016 | 0.000594 | 0.001916 | 0.000705 | BCL2/CASP | 7 |
| hsa04728 | Dopamine receptor             | 6/65 | 132/8016 | 0.000663 | 0.002103 | 0.000774 | MAOB/PRK  | 6 |
| hsa04915 | Estrogen signaling            | 6/65 | 138/8016 | 0.000838 | 0.002617 | 0.000963 | PGR/BCL2/ | 6 |
| hsa04912 | GnRH signaling                | 5/65 | 93/8016  | 0.0009   | 0.002768 | 0.001019 | JUN/PRKC, | 5 |
| hsa05205 | Proteoglycan                  | 7/65 | 204/8016 | 0.001243 | 0.003728 | 0.001373 | PRKCA/MM  | 7 |
| hsa04261 | Adrenergic                    | 6/65 | 149/8016 | 0.001249 | 0.003728 | 0.001373 | SCN5A/AC  | 6 |
| hsa04370 | VEGF signaling                | 4/65 | 59/8016  | 0.001283 | 0.003774 | 0.001389 | PTGS2/PRK | 4 |
| hsa05160 | Hepatitis C                   | 6/65 | 155/8016 | 0.00153  | 0.004437 | 0.001634 | RXRA/CAS  | 6 |
| hsa04928 | Parathyroid                   | 5/65 | 106/8016 | 0.001619 | 0.004629 | 0.001704 | RXRA/BCL2 | 5 |
| hsa04024 | cAMP signaling                | 7/65 | 216/8016 | 0.001729 | 0.004875 | 0.001795 | CHRM2/JU  | 7 |
| hsa04066 | HIF-1 signaling               | 5/65 | 109/8016 | 0.001832 | 0.005048 | 0.001859 | BCL2/PRKC | 5 |
| hsa05321 | Inflammation                  | 4/65 | 65/8016  | 0.00184  | 0.005048 | 0.001859 | JUN/RELA/ | 4 |
| hsa04720 | Long-term                     | 4/65 | 67/8016  | 0.002058 | 0.005571 | 0.002051 | PRKCA/PRK | 4 |
| hsa04215 | Apoptosis                     | 3/65 | 32/8016  | 0.002134 | 0.0057   | 0.002099 | BCL2/CASP | 3 |
| hsa04014 | Ras signaling                 | 7/65 | 232/8016 | 0.002594 | 0.006838 | 0.002517 | PRKCA/REI | 7 |
| hsa00982 | Drug metabolism               | 4/65 | 72/8016  | 0.00268  | 0.006976 | 0.002568 | ADH1C/M,  | 4 |
| hsa05020 | Prion disease                 | 3/65 | 35/8016  | 0.002768 | 0.007112 | 0.002618 | IL6/SOD1/ | 3 |
| hsa04971 | Gastric acid                  | 4/65 | 75/8016  | 0.00311  | 0.007891 | 0.002905 | CHRM3/PF  | 4 |
| hsa04960 | Aldosterone                   | 3/65 | 37/8016  | 0.003248 | 0.00798  | 0.002938 | NR3C2/PR  | 3 |
| hsa00980 | Metabolism                    | 4/65 | 76/8016  | 0.003263 | 0.00798  | 0.002938 | ADH1C/CY  | 4 |
| hsa05220 | Chronic myeloid               | 4/65 | 76/8016  | 0.003263 | 0.00798  | 0.002938 | RELA/NFKB | 4 |
| hsa05206 | MicroRNA                      | 8/65 | 310/8016 | 0.003382 | 0.008174 | 0.003009 | PTGS2/BCL | 8 |
| hsa04114 | Oocyte maturation             | 5/65 | 128/8016 | 0.003688 | 0.008807 | 0.003242 | PGR/CDK1  | 5 |
| hsa04068 | FoxO signaling                | 5/65 | 131/8016 | 0.004072 | 0.009611 | 0.003538 | IL6/CCNB1 | 5 |
| hsa04270 | Vascular smooth muscle        | 5/65 | 132/8016 | 0.004206 | 0.009814 | 0.003613 | ADRA1B/A  | 5 |
| hsa00380 | Tryptophan                    | 3/65 | 42/8016  | 0.004663 | 0.010756 | 0.00396  | MAOB/CYH  | 3 |
| hsa04012 | ErbB signaling                | 4/65 | 85/8016  | 0.004877 | 0.011125 | 0.004096 | JUN/PRKC, | 4 |
| hsa05165 | Human papillomavirus          | 8/65 | 330/8016 | 0.004937 | 0.011136 | 0.0041   | PTGS2/CAS | 8 |
| hsa05210 | Colorectal                    | 4/65 | 86/8016  | 0.005085 | 0.011343 | 0.004176 | BCL2/JUN/ | 4 |
| hsa04510 | Focal adhesion                | 6/65 | 199/8016 | 0.005311 | 0.011719 | 0.004314 | BCL2/JUN/ | 6 |
| hsa04540 | Gap junction                  | 4/65 | 88/8016  | 0.005517 | 0.012036 | 0.004431 | PRKCA/CD  | 4 |
| hsa05203 | Viral carcinogenesis          | 6/65 | 201/8016 | 0.005573 | 0.012036 | 0.004431 | JUN/CASP  | 6 |
| hsa05030 | Cocaine addiction             | 3/65 | 49/8016  | 0.007188 | 0.01536  | 0.005655 | MAOB/JUN  | 3 |
| hsa04713 | Circadian clock               | 4/65 | 97/8016  | 0.007765 | 0.016419 | 0.006045 | PRKCA/FO  | 4 |
| hsa01522 | Endocrine                     | 4/65 | 98/8016  | 0.008047 | 0.016668 | 0.006137 | BCL2/JUN/ | 4 |
| hsa05231 | Choline metabolism            | 4/65 | 98/8016  | 0.008047 | 0.016668 | 0.006137 | JUN/PRKC, | 4 |
| hsa04914 | Progesterone                  | 4/65 | 99/8016  | 0.008335 | 0.017091 | 0.006292 | PGR/CDK1  | 4 |
| hsa04750 | Inflammation                  | 4/65 | 100/8016 | 0.008631 | 0.01752  | 0.00645  | PRKCA/IL1 | 4 |
| hsa04310 | Wnt signaling                 | 5/65 | 160/8016 | 0.009383 | 0.01886  | 0.006943 | JUN/PRKC, | 5 |
| hsa04923 | Regulation                    | 3/65 | 55/8016  | 0.00989  | 0.019682 | 0.007246 | PTGS1/PTC | 3 |
| hsa05014 | Amyotrophic lateral sclerosis | 3/65 | 57/8016  | 0.010904 | 0.021491 | 0.007912 | BCL2/SOD  | 3 |
| hsa04022 | cGMP-PKC                      | 5/65 | 167/8016 | 0.011163 | 0.021789 | 0.008022 | ADRA1B/A  | 5 |
| hsa00140 | Steroid hormone               | 3/65 | 60/8016  | 0.012536 | 0.024236 | 0.008923 | CYP3A4/C  | 3 |
| hsa04071 | Sphingolipid                  | 4/65 | 119/8016 | 0.015595 | 0.029588 | 0.010893 | BCL2/PRKC | 4 |
| hsa04935 | Growth hormone                | 4/65 | 119/8016 | 0.015595 | 0.029588 | 0.010893 | PRKCA/FO  | 4 |
| hsa05223 | Non-small cell                | 3/65 | 66/8016  | 0.016198 | 0.030447 | 0.011209 | RXRA/PRK  | 3 |
| hsa05168 | Herpes simplex                | 9/65 | 491/8016 | 0.016828 | 0.031117 | 0.011456 | BCL2/CASP | 9 |
| hsa00830 | Retinol metabolism            | 3/65 | 67/8016  | 0.016861 | 0.031117 | 0.011456 | ADH1C/CY  | 3 |
| hsa04110 | Cell cycle                    | 4/65 | 124/8016 | 0.017882 | 0.032703 | 0.01204  | CDK1/CCN  | 4 |
| hsa04917 | Prolactin signaling           | 3/65 | 70/8016  | 0.01894  | 0.034329 | 0.012639 | RELA/FOS/ | 3 |
| hsa01524 | Platinum drug                 | 3/65 | 73/8016  | 0.021155 | 0.038005 | 0.013992 | BCL2/CASP | 3 |
| hsa04650 | Natural killer                | 4/65 | 131/8016 | 0.021419 | 0.03814  | 0.014042 | PRKCA/ICA | 4 |
| hsa05214 | Glioma                        | 3/65 | 75/8016  | 0.022708 | 0.039961 | 0.014712 | PRKCA/PRK | 3 |

|          |                  |         |          |          |          |          |   |
|----------|------------------|---------|----------|----------|----------|----------|---|
| hsa00591 | Linoleic ac 2/65 | 29/8016 | 0.022835 | 0.039961 | 0.014712 | CYP3A4/C | 2 |
| hsa03320 | PPAR sign:3/65   | 76/8016 | 0.023507 | 0.04044  | 0.014889 | RXRA/PPA | 3 |
| hsa05212 | Pancreatic 3/65  | 76/8016 | 0.023507 | 0.04044  | 0.014889 | RELA/CHU | 3 |
