# Supplementary material for: Network Pharmacology-Based Study on the Active Component and Mechanism of the Anti-Non-Invasive and Invasive Bladder Urothelial Carcinoma Effects of Zhuling Jisheng Decoction
Source: Hindawi journal article supplement (doi:10.1155/2021/7667707), 2021-12-31
Supplement: f1 [file 7667707.f1.zip]

| Category      | Term      | Count | %        | PValue   | Genes        | List Total | Pop Hits |
|---------------|-----------|-------|----------|----------|--------------|------------|----------|
| GOTERM_BP_FAT | GO:004212 | 27    | 39.13043 | 5.36E-16 | CAV1, PPA    | 66         | 787      |
| GOTERM_BP_FAT | GO:001003 | 26    | 37.68116 | 8.83E-16 | PRKCA, CA    | 66         | 721      |
| GOTERM_BP_FAT | GO:000971 | 19    | 27.53623 | 3.52E-13 | PRKCA, CA    | 66         | 405      |
| GOTERM_BP_FAT | GO:004854 | 14    | 20.28986 | 5.43E-12 | PRKCA, CA    | 66         | 192      |
| GOTERM_BP_FAT | GO:003196 | 11    | 15.94203 | 7.52E-12 | PRKCA, FO    | 66         | 85       |
| GOTERM_BP_FAT | GO:004298 | 23    | 33.33333 | 8.54E-12 | PRKCA, CC    | 66         | 804      |
| GOTERM_BP_FAT | GO:004306 | 23    | 33.33333 | 1.04E-11 | PRKCA, CC    | 66         | 812      |
| GOTERM_BP_FAT | GO:001094 | 23    | 33.33333 | 1.12E-11 | PRKCA, CC    | 66         | 815      |
| GOTERM_BP_FAT | GO:004405 | 16    | 23.18841 | 1.27E-11 | PLAT, PRK    | 66         | 309      |
| GOTERM_BP_FAT | GO:000961 | 19    | 27.53623 | 3.20E-11 | PLAT, IL6, I | 66         | 530      |
| GOTERM_BP_FAT | GO:000828 | 17    | 24.63768 | 7.29E-11 | PRKCA, OL    | 66         | 414      |
| GOTERM_BP_FAT | GO:005138 | 10    | 14.49275 | 1.08E-10 | PRKCA, FO    | 66         | 78       |
| GOTERM_BP_FAT | GO:003409 | 10    | 14.49275 | 1.21E-10 | PRKCA, FO    | 66         | 79       |
| GOTERM_BP_FAT | GO:000972 | 16    | 23.18841 | 1.44E-10 | PRKCA, CA    | 66         | 367      |
| GOTERM_BP_FAT | GO:004306 | 15    | 21.73913 | 9.96E-10 | CDK1, IL6,   | 66         | 354      |
| GOTERM_BP_FAT | GO:004306 | 15    | 21.73913 | 1.19E-09 | CDK1, IL6,   | 66         | 359      |
| GOTERM_BP_FAT | GO:006054 | 15    | 21.73913 | 1.24E-09 | CDK1, IL6,   | 66         | 360      |
| GOTERM_BP_FAT | GO:004409 | 18    | 26.08696 | 1.42E-09 | CDK1, ICAI   | 66         | 586      |
| GOTERM_BP_FAT | GO:004887 | 17    | 24.63768 | 1.64E-09 | PRKCA, CA    | 66         | 512      |
| GOTERM_BP_FAT | GO:000756 | 10    | 14.49275 | 2.44E-09 | PRKCA, FO    | 66         | 110      |
| GOTERM_BP_FAT | GO:000691 | 12    | 17.3913  | 3.41E-09 | CDK1, CCL    | 66         | 206      |
| GOTERM_BP_FAT | GO:001064 | 14    | 20.28986 | 4.33E-09 | CAV1, PPA    | 66         | 329      |
| GOTERM_BP_FAT | GO:004249 | 12    | 17.3913  | 5.61E-09 | FOS, CAV1    | 66         | 216      |
| GOTERM_BP_FAT | GO:001407 | 10    | 14.49275 | 5.70E-09 | PRKCA, FO    | 66         | 121      |
| GOTERM_BP_FAT | GO:000999 | 12    | 17.3913  | 6.79E-09 | FOS, CAV1    | 66         | 220      |
| GOTERM_BP_FAT | GO:000223 | 9     | 13.04348 | 7.20E-09 | FOS, IL6, C  | 66         | 86       |
| GOTERM_BP_FAT | GO:000724 | 24    | 34.78261 | 7.39E-09 | PRKCA, CC    | 66         | 1256     |
| GOTERM_BP_FAT | GO:004259 | 19    | 27.53623 | 8.66E-09 | PRKCA, CA    | 66         | 751      |
| GOTERM_BP_FAT | GO:001060 | 20    | 28.98551 | 1.08E-08 | PRKCA, CC    | 66         | 857      |
| GOTERM_BP_FAT | GO:000962 | 14    | 20.28986 | 1.65E-08 | PRKCA, FO    | 66         | 368      |
| GOTERM_BP_FAT | GO:005124 | 12    | 17.3913  | 1.99E-08 | CAV1, IL6,   | 66         | 244      |
| GOTERM_BP_FAT | GO:001062 | 12    | 17.3913  | 2.45E-08 | CAV1, PPA    | 66         | 249      |
| GOTERM_BP_FAT | GO:003166 | 11    | 15.94203 | 3.05E-08 | CAV1, CCL    | 66         | 197      |
| GOTERM_BP_FAT | GO:001003 | 11    | 15.94203 | 4.44E-08 | PRKCA, FO    | 66         | 205      |
| GOTERM_BP_FAT | GO:003249 | 8     | 11.5942  | 7.83E-08 | FOS, CCL2    | 66         | 77       |
| GOTERM_BP_FAT | GO:001074 | 10    | 14.49275 | 9.49E-08 | PPARD, IL6   | 66         | 167      |
| GOTERM_BP_FAT | GO:000828 | 13    | 18.84058 | 1.23E-07 | PRKCA, CA    | 66         | 361      |
| GOTERM_BP_FAT | GO:000996 | 12    | 17.3913  | 1.38E-07 | CAV1, PPA    | 66         | 295      |
| GOTERM_BP_FAT | GO:000724 | 13    | 18.84058 | 1.60E-07 | PRKCA, CA    | 66         | 370      |
| GOTERM_BP_FAT | GO:000687 | 13    | 18.84058 | 1.80E-07 | PRKCA, CA    | 66         | 374      |
| GOTERM_BP_FAT | GO:005508 | 13    | 18.84058 | 2.13E-07 | PRKCA, CA    | 66         | 380      |
| GOTERM_BP_FAT | GO:005105 | 9     | 13.04348 | 2.50E-07 | PRKCA, PT    | 66         | 135      |
| GOTERM_BP_FAT | GO:000961 | 7     | 10.14493 | 2.62E-07 | PRKCA, FO    | 66         | 56       |
| GOTERM_BP_FAT | GO:005090 | 7     | 10.14493 | 2.91E-07 | PRKCA, VC    | 66         | 57       |
| GOTERM_BP_FAT | GO:004206 | 10    | 14.49275 | 2.99E-07 | PLAT, CCN    | 66         | 191      |
| GOTERM_BP_FAT | GO:000758 | 9     | 13.04348 | 3.31E-07 | CAV1, CCL    | 66         | 140      |
| GOTERM_BP_FAT | GO:005080 | 13    | 18.84058 | 4.69E-07 | PRKCA, CA    | 66         | 409      |
| GOTERM_BP_FAT | GO:001024 | 7     | 10.14493 | 5.33E-07 | CCL2, PTG    | 66         | 63       |
| GOTERM_BP_FAT | GO:005109 | 9     | 13.04348 | 6.52E-07 | ICAM1, IL6   | 66         | 153      |
| GOTERM_BP_FAT | GO:004343 | 9     | 13.04348 | 6.85E-07 | PRKCA, ER    | 66         | 154      |
| GOTERM_BP_FAT | GO:003327 | 7     | 10.14493 | 7.05E-07 | CCL2, PTG    | 66         | 66       |
| GOTERM_BP_FAT | GO:005109 | 11    | 15.94203 | 7.55E-07 | PRKCA, PP    | 66         | 278      |
| GOTERM_BP_FAT | GO:003210 | 9     | 13.04348 | 8.73E-07 | PRKCA, CA    | 66         | 159      |
| GOTERM_BP_FAT | GO:000694 | 6     | 8.695652 | 9.73E-07 | CAV1, PTG    | 66         | 38       |
| GOTERM_BP_FAT | GO:005105 | 10    | 14.49275 | 1.10E-06 | PRKCA, CA    | 66         | 223      |
| GOTERM_BP_FAT | GO:000697 | 9     | 13.04348 | 1.10E-06 | PRKCA, FO    | 66         | 164      |
| GOTERM_BP_FAT | GO:000821 | 16    | 23.18841 | 1.14E-06 | PPARD, IL6   | 66         | 719      |

|               |           |    |          |          |              |    |     |
|---------------|-----------|----|----------|----------|--------------|----|-----|
| GOTERM_BP_FAT | GO:000693 | 7  | 10.14493 | 1.19E-06 | PRKCA, CA    | 66 | 72  |
| GOTERM_BP_FAT | GO:001626 | 16 | 23.18841 | 1.24E-06 | PPARD, IL6   | 66 | 724 |
| GOTERM_BP_FAT | GO:000030 | 7  | 10.14493 | 1.51E-06 | PRKCA, FO    | 66 | 75  |
| GOTERM_BP_FAT | GO:005110 | 8  | 11.5942  | 1.74E-06 | ICAM1, IL6   | 66 | 121 |
| GOTERM_BP_FAT | GO:001972 | 13 | 18.84058 | 1.86E-06 | PRKCA, CA    | 66 | 466 |
| GOTERM_BP_FAT | GO:005124 | 10 | 14.49275 | 2.24E-06 | PRKCA, CC    | 66 | 243 |
| GOTERM_BP_FAT | GO:000801 | 9  | 13.04348 | 2.84E-06 | CAV1, PTG    | 66 | 186 |
| GOTERM_BP_FAT | GO:000301 | 9  | 13.04348 | 2.84E-06 | CAV1, PTG    | 66 | 186 |
| GOTERM_BP_FAT | GO:000695 | 11 | 15.94203 | 3.09E-06 | FOS, IL6, C  | 66 | 325 |
| GOTERM_BP_FAT | GO:000961 | 9  | 13.04348 | 3.74E-06 | FOS, IL6, C  | 66 | 193 |
| GOTERM_BP_FAT | GO:000691 | 14 | 20.28986 | 4.58E-06 | PPARD, IL6   | 66 | 602 |
| GOTERM_BP_FAT | GO:001250 | 14 | 20.28986 | 5.39E-06 | PPARD, IL6   | 66 | 611 |
| GOTERM_BP_FAT | GO:004308 | 13 | 18.84058 | 5.75E-06 | CCNB1, CC    | 66 | 520 |
| GOTERM_BP_FAT | GO:000695 | 14 | 20.28986 | 5.78E-06 | IL6, CCL2, I | 66 | 615 |
| GOTERM_BP_FAT | GO:004001 | 7  | 10.14493 | 7.25E-06 | PRKCA, IC/   | 66 | 98  |
| GOTERM_BP_FAT | GO:004362 | 7  | 10.14493 | 1.08E-05 | PRKCA, CA    | 66 | 105 |
| GOTERM_BP_FAT | GO:003139 | 10 | 14.49275 | 1.08E-05 | PRKCA, CC    | 66 | 295 |
| GOTERM_BP_FAT | GO:005124 | 8  | 11.5942  | 1.31E-05 | PRKCA, CA    | 66 | 164 |
| GOTERM_BP_FAT | GO:000756 | 7  | 10.14493 | 1.41E-05 | FOS, PPAR    | 66 | 110 |
| GOTERM_BP_FAT | GO:003227 | 9  | 13.04348 | 1.49E-05 | PRKCA, CC    | 66 | 233 |
| GOTERM_BP_FAT | GO:000193 | 8  | 11.5942  | 1.85E-05 | PRKCA, CA    | 66 | 173 |
| GOTERM_BP_FAT | GO:003109 | 6  | 8.695652 | 1.94E-05 | CCNB1, CC    | 66 | 69  |
| GOTERM_BP_FAT | GO:004338 | 6  | 8.695652 | 2.08E-05 | ICAM1, IL6   | 66 | 70  |
| GOTERM_BP_FAT | GO:000156 | 9  | 13.04348 | 2.14E-05 | PLAT, CAV    | 66 | 245 |
| GOTERM_BP_FAT | GO:000181 | 8  | 11.5942  | 2.47E-05 | IL6, RELA, I | 66 | 181 |
| GOTERM_BP_FAT | GO:000194 | 9  | 13.04348 | 2.54E-05 | PLAT, CAV    | 66 | 251 |
| GOTERM_BP_FAT | GO:005172 | 10 | 14.49275 | 2.70E-05 | CCNB1, CC    | 66 | 331 |
| GOTERM_BP_FAT | GO:003000 | 9  | 13.04348 | 2.77E-05 | PRKCA, CA    | 66 | 254 |
| GOTERM_BP_FAT | GO:003140 | 8  | 11.5942  | 3.05E-05 | PRKCA, CC    | 66 | 187 |
| GOTERM_BP_FAT | GO:005072 | 6  | 8.695652 | 3.11E-05 | PRKCA, IL6   | 66 | 76  |
| GOTERM_BP_FAT | GO:000801 | 6  | 8.695652 | 3.31E-05 | PRKCA, CH    | 66 | 77  |
| GOTERM_BP_FAT | GO:001407 | 5  | 7.246377 | 3.52E-05 | CCL2, REL/   | 66 | 39  |
| GOTERM_BP_FAT | GO:005109 | 6  | 8.695652 | 3.53E-05 | ICAM1, IL6   | 66 | 78  |
| GOTERM_BP_FAT | GO:004306 | 11 | 15.94203 | 3.55E-05 | PRKCA, PT    | 66 | 430 |
| GOTERM_BP_FAT | GO:004001 | 8  | 11.5942  | 3.61E-05 | PRKCA, IC/   | 66 | 192 |
| GOTERM_BP_FAT | GO:004306 | 11 | 15.94203 | 3.77E-05 | PRKCA, PT    | 66 | 433 |
| GOTERM_BP_FAT | GO:001094 | 11 | 15.94203 | 3.92E-05 | PRKCA, PT    | 66 | 435 |
| GOTERM_BP_FAT | GO:000687 | 8  | 11.5942  | 4.12E-05 | PRKCA, CA    | 66 | 196 |
| GOTERM_BP_FAT | GO:005109 | 5  | 7.246377 | 4.30E-05 | ICAM1, IL6   | 66 | 41  |
| GOTERM_BP_FAT | GO:004239 | 7  | 10.14493 | 4.32E-05 | CAV1, PPA    | 66 | 134 |
| GOTERM_BP_FAT | GO:000194 | 5  | 7.246377 | 4.74E-05 | PPARD, PT    | 66 | 42  |
| GOTERM_BP_FAT | GO:002240 | 5  | 7.246377 | 4.74E-05 | PPARD, PT    | 66 | 42  |
| GOTERM_BP_FAT | GO:002240 | 5  | 7.246377 | 4.74E-05 | PPARD, PT    | 66 | 42  |
| GOTERM_BP_FAT | GO:000926 | 6  | 8.695652 | 4.76E-05 | FOS, CCL2    | 66 | 83  |
| GOTERM_BP_FAT | GO:005117 | 13 | 18.84058 | 4.84E-05 | ICAM1, IL6   | 66 | 644 |
| GOTERM_BP_FAT | GO:001647 | 9  | 13.04348 | 5.00E-05 | PRKCA, PL    | 66 | 276 |
| GOTERM_BP_FAT | GO:004263 | 5  | 7.246377 | 5.20E-05 | PPARD, PT    | 66 | 43  |
| GOTERM_BP_FAT | GO:004230 | 5  | 7.246377 | 5.20E-05 | PPARD, PT    | 66 | 43  |
| GOTERM_BP_FAT | GO:005506 | 8  | 11.5942  | 5.48E-05 | PRKCA, CA    | 66 | 205 |
| GOTERM_BP_FAT | GO:005141 | 4  | 5.797101 | 5.67E-05 | PRKCA, FO    | 66 | 16  |
| GOTERM_BP_FAT | GO:005508 | 9  | 13.04348 | 6.42E-05 | PRKCA, CA    | 66 | 286 |
| GOTERM_BP_FAT | GO:003033 | 6  | 8.695652 | 6.66E-05 | ICAM1, IL6   | 66 | 89  |
| GOTERM_BP_FAT | GO:000193 | 6  | 8.695652 | 6.66E-05 | PRKCA, CA    | 66 | 89  |
| GOTERM_BP_FAT | GO:000646 | 13 | 18.84058 | 6.79E-05 | PRKCA, CC    | 66 | 667 |
| GOTERM_BP_FAT | GO:004866 | 5  | 7.246377 | 6.81E-05 | PRKCA, IL6   | 66 | 46  |
| GOTERM_BP_FAT | GO:004232 | 11 | 15.94203 | 6.98E-05 | PRKCA, CA    | 66 | 466 |
| GOTERM_BP_FAT | GO:000761 | 11 | 15.94203 | 7.37E-05 | PRKCA, FO    | 66 | 469 |
| GOTERM_BP_FAT | GO:003226 | 11 | 15.94203 | 8.05E-05 | PRKCA, CC    | 66 | 474 |

|               |           |    |          |          |             |    |     |
|---------------|-----------|----|----------|----------|-------------|----|-----|
| GOTERM_BP_FAT | GO:000692 | 11 | 15.94203 | 8.19E-05 | PRKCA, PL   | 66 | 475 |
| GOTERM_BP_FAT | GO:003132 | 13 | 18.84058 | 8.77E-05 | ICAM1, IL6  | 66 | 685 |
| GOTERM_BP_FAT | GO:004662 | 4  | 5.797101 | 9.71E-05 | PRKCA, RE   | 66 | 19  |
| GOTERM_BP_FAT | GO:001922 | 11 | 15.94203 | 9.74E-05 | PRKCA, CA   | 66 | 485 |
| GOTERM_BP_FAT | GO:005117 | 11 | 15.94203 | 9.74E-05 | PRKCA, CA   | 66 | 485 |
| GOTERM_BP_FAT | GO:004232 | 6  | 8.695652 | 1.00E-04 | PRKCA, CA   | 66 | 97  |
| GOTERM_BP_FAT | GO:000989 | 13 | 18.84058 | 1.01E-04 | ICAM1, IL6  | 66 | 695 |
| GOTERM_BP_FAT | GO:003000 | 8  | 11.5942  | 1.04E-04 | PRKCA, CA   | 66 | 227 |
| GOTERM_BP_FAT | GO:005167 | 9  | 13.04348 | 1.05E-04 | PRKCA, PL   | 66 | 307 |
| GOTERM_BP_FAT | GO:004887 | 9  | 13.04348 | 1.05E-04 | PRKCA, PL   | 66 | 307 |
| GOTERM_BP_FAT | GO:005127 | 6  | 8.695652 | 1.05E-04 | ICAM1, IL6  | 66 | 98  |
| GOTERM_BP_FAT | GO:004559 | 8  | 11.5942  | 1.10E-04 | PPARD, IL6  | 66 | 229 |
| GOTERM_BP_FAT | GO:003257 | 4  | 5.797101 | 1.14E-04 | FOS, CAV1   | 66 | 20  |
| GOTERM_BP_FAT | GO:005138 | 4  | 5.797101 | 1.14E-04 | PRKCA, FO   | 66 | 20  |
| GOTERM_BP_FAT | GO:001056 | 6  | 8.695652 | 1.16E-04 | PRKCA, CA   | 66 | 100 |
| GOTERM_BP_FAT | GO:004858 | 6  | 8.695652 | 1.16E-04 | PRKCA, RE   | 66 | 100 |
| GOTERM_BP_FAT | GO:000821 | 6  | 8.695652 | 1.16E-04 | PTGS2, PTG  | 66 | 100 |
| GOTERM_BP_FAT | GO:004593 | 6  | 8.695652 | 1.16E-04 | PRKCA, CA   | 66 | 100 |
| GOTERM_BP_FAT | GO:000726 | 12 | 17.3913  | 1.20E-04 | PRKCA, PL   | 66 | 600 |
| GOTERM_BP_FAT | GO:002170 | 6  | 8.695652 | 1.22E-04 | CCNB1, PG   | 66 | 101 |
| GOTERM_BP_FAT | GO:004327 | 5  | 7.246377 | 1.28E-04 | RELA, BCL2  | 66 | 54  |
| GOTERM_BP_FAT | GO:004858 | 8  | 11.5942  | 1.32E-04 | PRKCA, IL6  | 66 | 236 |
| GOTERM_BP_FAT | GO:005109 | 6  | 8.695652 | 1.33E-04 | ICAM1, IL6  | 66 | 103 |
| GOTERM_BP_FAT | GO:000150 | 9  | 13.04348 | 1.37E-04 | PRKCA, PT   | 66 | 319 |
| GOTERM_BP_FAT | GO:005506 | 8  | 11.5942  | 1.43E-04 | PRKCA, CA   | 66 | 239 |
| GOTERM_BP_FAT | GO:004254 | 5  | 7.246377 | 1.48E-04 | RELA, JUN,  | 66 | 56  |
| GOTERM_BP_FAT | GO:000301 | 7  | 10.14493 | 1.51E-04 | CHRM3, G.   | 66 | 168 |
| GOTERM_BP_FAT | GO:003033 | 7  | 10.14493 | 1.56E-04 | ICAM1, IL6  | 66 | 169 |
| GOTERM_BP_FAT | GO:001064 | 8  | 11.5942  | 1.80E-04 | PRKCA, CA   | 66 | 248 |
| GOTERM_BP_FAT | GO:006034 | 8  | 11.5942  | 1.80E-04 | PRKCA, IL6  | 66 | 248 |
| GOTERM_BP_FAT | GO:004409 | 9  | 13.04348 | 1.88E-04 | PRKCA, CA   | 66 | 334 |
| GOTERM_BP_FAT | GO:000761 | 6  | 8.695652 | 1.90E-04 | PRKCA, FO   | 66 | 111 |
| GOTERM_BP_FAT | GO:000189 | 5  | 7.246377 | 1.93E-04 | PPARD, PT   | 66 | 60  |
| GOTERM_BP_FAT | GO:005109 | 5  | 7.246377 | 1.93E-04 | ICAM1, IL6  | 66 | 60  |
| GOTERM_BP_FAT | GO:000110 | 4  | 5.797101 | 1.99E-04 | CCL2, RELA  | 66 | 24  |
| GOTERM_BP_FAT | GO:000963 | 5  | 7.246377 | 2.06E-04 | PRKCA, FO   | 66 | 61  |
| GOTERM_BP_FAT | GO:000150 | 6  | 8.695652 | 2.24E-04 | PTGS2, BCL  | 66 | 115 |
| GOTERM_BP_FAT | GO:000687 | 7  | 10.14493 | 2.41E-04 | PRKCA, CA   | 66 | 183 |
| GOTERM_BP_FAT | GO:000854 | 7  | 10.14493 | 2.48E-04 | PPARD, PT   | 66 | 184 |
| GOTERM_BP_FAT | GO:001055 | 12 | 17.3913  | 2.55E-04 | FOS, IL6, R | 66 | 654 |
| GOTERM_BP_FAT | GO:005507 | 7  | 10.14493 | 2.78E-04 | PRKCA, CA   | 66 | 188 |
| GOTERM_BP_FAT | GO:004542 | 4  | 5.797101 | 2.85E-04 | ICAM1, CA   | 66 | 27  |
| GOTERM_BP_FAT | GO:006034 | 6  | 8.695652 | 3.06E-04 | PTGS2, BCL  | 66 | 123 |
| GOTERM_BP_FAT | GO:003296 | 4  | 5.797101 | 3.18E-04 | COL3A1, C   | 66 | 28  |
| GOTERM_BP_FAT | GO:005127 | 7  | 10.14493 | 3.20E-04 | ICAM1, IL6  | 66 | 193 |
| GOTERM_BP_FAT | GO:005192 | 5  | 7.246377 | 3.32E-04 | CAV1, PTG   | 66 | 69  |
| GOTERM_BP_FAT | GO:005092 | 4  | 5.797101 | 3.54E-04 | PRKCA, IL6  | 66 | 29  |
| GOTERM_BP_FAT | GO:001631 | 13 | 18.84058 | 3.72E-04 | PRKCA, CC   | 66 | 800 |
| GOTERM_BP_FAT | GO:000739 | 7  | 10.14493 | 3.77E-04 | PPARD, PT   | 66 | 199 |
| GOTERM_BP_FAT | GO:001003 | 6  | 8.695652 | 3.81E-04 | CAV1, PTG   | 66 | 129 |
| GOTERM_BP_FAT | GO:004594 | 9  | 13.04348 | 3.82E-04 | FOS, IL6, R | 66 | 371 |
| GOTERM_BP_FAT | GO:000931 | 7  | 10.14493 | 3.87E-04 | FOS, CAV1   | 66 | 200 |
| GOTERM_BP_FAT | GO:000756 | 4  | 5.797101 | 3.92E-04 | PPARD, PT   | 66 | 30  |
| GOTERM_BP_FAT | GO:005104 | 7  | 10.14493 | 4.09E-04 | PRKCA, IL6  | 66 | 202 |
| GOTERM_BP_FAT | GO:000252 | 6  | 8.695652 | 4.09E-04 | VCAM1, BCL  | 66 | 131 |
| GOTERM_BP_FAT | GO:004425 | 4  | 5.797101 | 4.32E-04 | COL3A1, C   | 66 | 31  |
| GOTERM_BP_FAT | GO:004866 | 4  | 5.797101 | 4.32E-04 | PRKCA, IL6  | 66 | 31  |
| GOTERM_BP_FAT | GO:005092 | 4  | 5.797101 | 4.32E-04 | PRKCA, IL6  | 66 | 31  |

|               |           |    |          |          |              |    |     |
|---------------|-----------|----|----------|----------|--------------|----|-----|
| GOTERM_BP_FAT | GO:000177 | 8  | 11.5942  | 4.37E-04 | VCAM1, IC    | 66 | 287 |
| GOTERM_BP_FAT | GO:000166 | 6  | 8.695652 | 4.54E-04 | PLAT, CAV    | 66 | 134 |
| GOTERM_BP_FAT | GO:000193 | 4  | 5.797101 | 4.75E-04 | CAV1, CCL    | 66 | 32  |
| GOTERM_BP_FAT | GO:000193 | 4  | 5.797101 | 4.75E-04 | PRKCA, CA    | 66 | 32  |
| GOTERM_BP_FAT | GO:003015 | 6  | 8.695652 | 5.02E-04 | ICAM1, ER    | 66 | 137 |
| GOTERM_BP_FAT | GO:003288 | 6  | 8.695652 | 5.19E-04 | IL6, BCL2, I | 66 | 138 |
| GOTERM_BP_FAT | GO:001922 | 4  | 5.797101 | 5.70E-04 | CAV1, PTG    | 66 | 34  |
| GOTERM_BP_FAT | GO:004852 | 4  | 5.797101 | 5.70E-04 | PRKCA, IL6   | 66 | 34  |
| GOTERM_BP_FAT | GO:001082 | 4  | 5.797101 | 5.70E-04 | PRKCA, ER    | 66 | 34  |
| GOTERM_BP_FAT | GO:005087 | 6  | 8.695652 | 5.73E-04 | PLAT, IL6, I | 66 | 141 |
| GOTERM_BP_FAT | GO:007048 | 6  | 8.695652 | 5.73E-04 | PLAT, CAV    | 66 | 141 |
| GOTERM_BP_FAT | GO:001095 | 5  | 7.246377 | 6.12E-04 | CAV1, PTG    | 66 | 81  |
| GOTERM_BP_FAT | GO:000679 | 14 | 20.28986 | 6.25E-04 | PRKCA, CC    | 66 | 973 |
| GOTERM_BP_FAT | GO:000679 | 14 | 20.28986 | 6.25E-04 | PRKCA, CC    | 66 | 973 |
| GOTERM_BP_FAT | GO:000996 | 7  | 10.14493 | 6.57E-04 | PRKCA, CA    | 66 | 221 |
| GOTERM_BP_FAT | GO:000177 | 4  | 5.797101 | 6.75E-04 | IL6, BCL2, I | 66 | 36  |
| GOTERM_BP_FAT | GO:001060 | 12 | 17.3913  | 6.79E-04 | PRKCA, CA    | 66 | 734 |
| GOTERM_BP_FAT | GO:004593 | 11 | 15.94203 | 7.32E-04 | FOS, IL6, R  | 66 | 624 |
| GOTERM_BP_FAT | GO:000989 | 4  | 5.797101 | 7.32E-04 | RELA, ADR    | 66 | 37  |
| GOTERM_BP_FAT | GO:003059 | 4  | 5.797101 | 7.32E-04 | PRKCA, IL6   | 66 | 37  |
| GOTERM_BP_FAT | GO:004423 | 4  | 5.797101 | 7.32E-04 | COL3A1, C    | 66 | 37  |
| GOTERM_BP_FAT | GO:006042 | 7  | 10.14493 | 7.56E-04 | PGR, JUN,    | 66 | 227 |
| GOTERM_BP_FAT | GO:000734 | 6  | 8.695652 | 8.05E-04 | CDK1, BCL    | 66 | 152 |
| GOTERM_BP_FAT | GO:006032 | 4  | 5.797101 | 8.55E-04 | PRKCA, IL6   | 66 | 39  |
| GOTERM_BP_FAT | GO:000695 | 4  | 5.797101 | 9.21E-04 | IL6, PTGER   | 66 | 40  |
| GOTERM_BP_FAT | GO:000268 | 7  | 10.14493 | 9.67E-04 | VCAM1, IC    | 66 | 238 |
| GOTERM_BP_FAT | GO:003313 | 3  | 4.347826 | 9.98E-04 | CAV1, IL6,   | 66 | 10  |
| GOTERM_BP_FAT | GO:005159 | 4  | 5.797101 | 0.001063 | FOS, RELA,   | 66 | 42  |
| GOTERM_BP_FAT | GO:005189 | 4  | 5.797101 | 0.001139 | CAV1, JUN    | 66 | 43  |
| GOTERM_BP_FAT | GO:005134 | 5  | 7.246377 | 0.001158 | PRKCA, CA    | 66 | 96  |
| GOTERM_BP_FAT | GO:000989 | 5  | 7.246377 | 0.001158 | RELA, ADR    | 66 | 96  |
| GOTERM_BP_FAT | GO:005189 | 3  | 4.347826 | 0.001216 | F3, IGF2, F  | 66 | 11  |
| GOTERM_BP_FAT | GO:000252 | 5  | 7.246377 | 0.00125  | IL6, PTGER   | 66 | 98  |
| GOTERM_BP_FAT | GO:004326 | 5  | 7.246377 | 0.001298 | CAV1, PTG    | 66 | 99  |
| GOTERM_BP_FAT | GO:004232 | 4  | 5.797101 | 0.001301 | PRKCA, CA    | 66 | 45  |
| GOTERM_BP_FAT | GO:003286 | 5  | 7.246377 | 0.001347 | ERBB3, REL   | 66 | 100 |
| GOTERM_BP_FAT | GO:005079 | 4  | 5.797101 | 0.001387 | PRKCA, IL6   | 66 | 46  |
| GOTERM_BP_FAT | GO:000269 | 5  | 7.246377 | 0.001398 | ICAM1, IL6   | 66 | 101 |
| GOTERM_BP_FAT | GO:004594 | 10 | 14.49275 | 0.00142  | FOS, IL6, R  | 66 | 564 |
| GOTERM_BP_FAT | GO:000759 | 5  | 7.246377 | 0.00145  | PLAT, IL6, I | 66 | 102 |
| GOTERM_BP_FAT | GO:005081 | 5  | 7.246377 | 0.00145  | PLAT, IL6, I | 66 | 102 |
| GOTERM_BP_FAT | GO:001406 | 3  | 4.347826 | 0.001455 | PPARD, ER    | 66 | 12  |
| GOTERM_BP_FAT | GO:003355 | 10 | 14.49275 | 0.001455 | CDK1, FOS    | 66 | 566 |
| GOTERM_BP_FAT | GO:004853 | 7  | 10.14493 | 0.001522 | VCAM1, BC    | 66 | 260 |
| GOTERM_BP_FAT | GO:004593 | 4  | 5.797101 | 0.001569 | PRKCA, CA    | 66 | 48  |
| GOTERM_BP_FAT | GO:001056 | 4  | 5.797101 | 0.001569 | PRKCA, CA    | 66 | 48  |
| GOTERM_BP_FAT | GO:000695 | 11 | 15.94203 | 0.00157  | ICAM1, IL6   | 66 | 690 |
| GOTERM_BP_FAT | GO:000300 | 7  | 10.14493 | 0.001582 | CCNB1, PC    | 66 | 262 |
| GOTERM_BP_FAT | GO:000989 | 4  | 5.797101 | 0.001666 | ADRA1B, C    | 66 | 49  |
| GOTERM_BP_FAT | GO:003350 | 4  | 5.797101 | 0.001666 | SLC2A4, PI   | 66 | 49  |
| GOTERM_BP_FAT | GO:004259 | 4  | 5.797101 | 0.001666 | SLC2A4, PI   | 66 | 49  |
| GOTERM_BP_FAT | GO:004872 | 6  | 8.695652 | 0.001709 | BCL2, RXR,   | 66 | 180 |
| GOTERM_BP_FAT | GO:001406 | 3  | 4.347826 | 0.001714 | PPARD, ER    | 66 | 13  |
| GOTERM_BP_FAT | GO:004590 | 3  | 4.347826 | 0.001714 | CAV1, PTG    | 66 | 13  |
| GOTERM_BP_FAT | GO:004312 | 5  | 7.246377 | 0.001729 | RELA, CASI   | 66 | 107 |
| GOTERM_BP_FAT | GO:001062 | 10 | 14.49275 | 0.001743 | FOS, IL6, R  | 66 | 581 |
| GOTERM_BP_FAT | GO:000759 | 5  | 7.246377 | 0.001789 | PLAT, IL6, I | 66 | 108 |
| GOTERM_BP_FAT | GO:004000 | 6  | 8.695652 | 0.001838 | CCNB1, PP    | 66 | 183 |

|               |           |   |          |          |              |    |     |
|---------------|-----------|---|----------|----------|--------------|----|-----|
| GOTERM_BP_FAT | GO:000016 | 6 | 8.695652 | 0.001882 | PRKCA, CA    | 66 | 184 |
| GOTERM_BP_FAT | GO:004589 | 9 | 13.04348 | 0.001948 | FOS, IL6, R  | 66 | 477 |
| GOTERM_BP_FAT | GO:000762 | 7 | 10.14493 | 0.001985 | PRKCA, IL6   | 66 | 274 |
| GOTERM_BP_FAT | GO:005133 | 8 | 11.5942  | 0.001986 | PRKCA, CA    | 66 | 372 |
| GOTERM_BP_FAT | GO:003526 | 3 | 4.347826 | 0.001993 | BCL2, RXR,   | 66 | 14  |
| GOTERM_BP_FAT | GO:003313 | 3 | 4.347826 | 0.001993 | CAV1, IL6,   | 66 | 14  |
| GOTERM_BP_FAT | GO:005124 | 6 | 8.695652 | 0.00202  | PRKCA, CA    | 66 | 187 |
| GOTERM_BP_FAT | GO:001921 | 5 | 7.246377 | 0.002044 | CAV1, PPA    | 66 | 112 |
| GOTERM_BP_FAT | GO:005125 | 9 | 13.04348 | 0.002052 | FOS, IL6, R  | 66 | 481 |
| GOTERM_BP_FAT | GO:000252 | 7 | 10.14493 | 0.002059 | VCAM1, BC    | 66 | 276 |
| GOTERM_BP_FAT | GO:003515 | 4 | 5.797101 | 0.00209  | CAV1, ADF    | 66 | 53  |
| GOTERM_BP_FAT | GO:005088 | 4 | 5.797101 | 0.00209  | CAV1, ADF    | 66 | 53  |
| GOTERM_BP_FAT | GO:004308 | 7 | 10.14493 | 0.002096 | PRKCA, CA    | 66 | 277 |
| GOTERM_BP_FAT | GO:005122 | 5 | 7.246377 | 0.002181 | IL6, TNFSF   | 66 | 114 |
| GOTERM_BP_FAT | GO:004247 | 4 | 5.797101 | 0.002205 | ERBB3, TP6   | 66 | 54  |
| GOTERM_BP_FAT | GO:003235 | 4 | 5.797101 | 0.002205 | PRKCA, PT    | 66 | 54  |
| GOTERM_BP_FAT | GO:000718 | 5 | 7.246377 | 0.002251 | CCL2, PTG    | 66 | 115 |
| GOTERM_BP_FAT | GO:000268 | 3 | 4.347826 | 0.002293 | ICAM1, IL6   | 66 | 15  |
| GOTERM_BP_FAT | GO:004662 | 3 | 4.347826 | 0.002293 | PRKCA, RE    | 66 | 15  |
| GOTERM_BP_FAT | GO:005104 | 4 | 5.797101 | 0.002324 | ERBB3, PTC   | 66 | 55  |
| GOTERM_BP_FAT | GO:000940 | 4 | 5.797101 | 0.002447 | CCL2, BCL2   | 66 | 56  |
| GOTERM_BP_FAT | GO:004327 | 3 | 4.347826 | 0.002612 | RELA, ADR    | 66 | 16  |
| GOTERM_BP_FAT | GO:002261 | 3 | 4.347826 | 0.002612 | CAV1, ERB    | 66 | 16  |
| GOTERM_BP_FAT | GO:001407 | 3 | 4.347826 | 0.002612 | RELA, ADR    | 66 | 16  |
| GOTERM_BP_FAT | GO:003328 | 3 | 4.347826 | 0.002612 | PTGS2, RXI   | 66 | 16  |
| GOTERM_BP_FAT | GO:004664 | 6 | 8.695652 | 0.002647 | VCAM1, IC    | 66 | 199 |
| GOTERM_BP_FAT | GO:000301 | 4 | 5.797101 | 0.002706 | CAV1, ADF    | 66 | 58  |
| GOTERM_BP_FAT | GO:007020 | 5 | 7.246377 | 0.002708 | IL6, TNFSF   | 66 | 121 |
| GOTERM_BP_FAT | GO:004231 | 3 | 4.347826 | 0.002951 | CAV1, ADF    | 66 | 17  |
| GOTERM_BP_FAT | GO:004320 | 3 | 4.347826 | 0.002951 | CCL2, RELA   | 66 | 17  |
| GOTERM_BP_FAT | GO:005189 | 3 | 4.347826 | 0.002951 | F3, IGF2, F  | 66 | 17  |
| GOTERM_BP_FAT | GO:007055 | 3 | 4.347826 | 0.002951 | PRKCA, RE    | 66 | 17  |
| GOTERM_BP_FAT | GO:000717 | 4 | 5.797101 | 0.00298  | FOS, CCL2    | 66 | 60  |
| GOTERM_BP_FAT | GO:006053 | 5 | 7.246377 | 0.003045 | CAV1, ERB    | 66 | 125 |
| GOTERM_BP_FAT | GO:004211 | 5 | 7.246377 | 0.003134 | ICAM1, BC    | 66 | 126 |
| GOTERM_BP_FAT | GO:004598 | 3 | 4.347826 | 0.00331  | PTGS2, CH    | 66 | 18  |
| GOTERM_BP_FAT | GO:003059 | 3 | 4.347826 | 0.00331  | PRKCA, CC    | 66 | 18  |
| GOTERM_BP_FAT | GO:004663 | 3 | 4.347826 | 0.00331  | BCL2, IRF1   | 66 | 18  |
| GOTERM_BP_FAT | GO:004851 | 5 | 7.246377 | 0.003316 | PGR, ERBB    | 66 | 128 |
| GOTERM_BP_FAT | GO:004851 | 6 | 8.695652 | 0.003405 | PLAT, CAV    | 66 | 211 |
| GOTERM_BP_FAT | GO:000724 | 4 | 5.797101 | 0.003423 | TNFSF15, I   | 66 | 63  |
| GOTERM_BP_FAT | GO:001993 | 5 | 7.246377 | 0.003506 | CCL2, PTG    | 66 | 130 |
| GOTERM_BP_FAT | GO:003210 | 4 | 5.797101 | 0.00358  | PRKCA, IL6   | 66 | 64  |
| GOTERM_BP_FAT | GO:004547 | 4 | 5.797101 | 0.00358  | PRKCA, CC    | 66 | 64  |
| GOTERM_BP_FAT | GO:005092 | 3 | 4.347826 | 0.003688 | PRKCA, F3,   | 66 | 19  |
| GOTERM_BP_FAT | GO:005092 | 3 | 4.347826 | 0.003688 | PRKCA, F3,   | 66 | 19  |
| GOTERM_BP_FAT | GO:005140 | 3 | 4.347826 | 0.003688 | ERBB3, BCI   | 66 | 19  |
| GOTERM_BP_FAT | GO:000750 | 6 | 8.695652 | 0.003689 | ERBB3, RXI   | 66 | 215 |
| GOTERM_BP_FAT | GO:000729 | 4 | 5.797101 | 0.00374  | CCNB1, PG    | 66 | 65  |
| GOTERM_BP_FAT | GO:003287 | 5 | 7.246377 | 0.003804 | FOS, ERBB    | 66 | 133 |
| GOTERM_BP_FAT | GO:003258 | 5 | 7.246377 | 0.003907 | IL6, RXRA,   | 66 | 134 |
| GOTERM_BP_FAT | GO:004873 | 5 | 7.246377 | 0.004012 | PGR, CAV1    | 66 | 135 |
| GOTERM_BP_FAT | GO:005122 | 4 | 5.797101 | 0.004074 | IL6, TNFSF   | 66 | 67  |
| GOTERM_BP_FAT | GO:000680 | 4 | 5.797101 | 0.004074 | NCF1, BCL    | 66 | 67  |
| GOTERM_BP_FAT | GO:000268 | 3 | 4.347826 | 0.004085 | ICAM1, IL6   | 66 | 20  |
| GOTERM_BP_FAT | GO:005160 | 3 | 4.347826 | 0.004085 | IL6, RELA, I | 66 | 20  |
| GOTERM_BP_FAT | GO:004867 | 3 | 4.347826 | 0.004085 | BCL2, RXR,   | 66 | 20  |
| GOTERM_BP_FAT | GO:005073 | 4 | 5.797101 | 0.004247 | PRKCA, CA    | 66 | 68  |

|               |           |    |          |          |              |    |      |
|---------------|-----------|----|----------|----------|--------------|----|------|
| GOTERM_BP_FAT | GO:003286 | 4  | 5.797101 | 0.004247 | ERBB3, RXR   | 66 | 68   |
| GOTERM_BP_FAT | GO:004654 | 4  | 5.797101 | 0.004425 | PGR, BCL2,   | 66 | 69   |
| GOTERM_BP_FAT | GO:004666 | 4  | 5.797101 | 0.004425 | PGR, BCL2,   | 66 | 69   |
| GOTERM_BP_FAT | GO:005087 | 14 | 20.28986 | 0.004436 | PLAT, PRK    | 66 | 1210 |
| GOTERM_BP_FAT | GO:000267 | 3  | 4.347826 | 0.004501 | IL6, PPARG   | 66 | 21   |
| GOTERM_BP_FAT | GO:004593 | 3  | 4.347826 | 0.004501 | PTGS2, CH    | 66 | 21   |
| GOTERM_BP_FAT | GO:004542 | 3  | 4.347826 | 0.004501 | ICAM1, IL1   | 66 | 21   |
| GOTERM_BP_FAT | GO:001922 | 4  | 5.797101 | 0.004608 | IL6, CCL2, I | 66 | 70   |
| GOTERM_BP_FAT | GO:004340 | 5  | 7.246377 | 0.004682 | PRKCA, CA    | 66 | 141  |
| GOTERM_BP_FAT | GO:000715 | 3  | 4.347826 | 0.004936 | VCAM1, IC    | 66 | 22   |
| GOTERM_BP_FAT | GO:003134 | 4  | 5.797101 | 0.005182 | PRKCA, IL6   | 66 | 73   |
| GOTERM_BP_FAT | GO:001993 | 6  | 8.695652 | 0.005371 | CCL2, PTG    | 66 | 235  |
| GOTERM_BP_FAT | GO:004203 | 4  | 5.797101 | 0.005383 | IL6, RELA, I | 66 | 74   |
| GOTERM_BP_FAT | GO:001033 | 3  | 4.347826 | 0.005389 | CAV1, CCL    | 66 | 23   |
| GOTERM_BP_FAT | GO:003009 | 6  | 8.695652 | 0.005467 | VCAM1, B     | 66 | 236  |
| GOTERM_BP_FAT | GO:005133 | 7  | 10.14493 | 0.005492 | CAV1, PTG    | 66 | 337  |
| GOTERM_BP_FAT | GO:004866 | 7  | 10.14493 | 0.00565  | PRKCA, IL6   | 66 | 339  |
| GOTERM_BP_FAT | GO:000716 | 7  | 10.14493 | 0.005893 | PLAT, FOS,   | 66 | 342  |
| GOTERM_BP_FAT | GO:000989 | 9  | 13.04348 | 0.005939 | PRKCA, CA    | 66 | 573  |
| GOTERM_BP_FAT | GO:004532 | 6  | 8.695652 | 0.00607  | VCAM1, IC    | 66 | 242  |
| GOTERM_BP_FAT | GO:004585 | 7  | 10.14493 | 0.006144 | PRKCA, CA    | 66 | 345  |
| GOTERM_BP_FAT | GO:000693 | 5  | 7.246377 | 0.006241 | CHRM3, G     | 66 | 153  |
| GOTERM_BP_FAT | GO:004873 | 3  | 4.347826 | 0.006351 | BCL2, TP63   | 66 | 25   |
| GOTERM_BP_FAT | GO:004277 | 4  | 5.797101 | 0.006685 | CDK1, TP63   | 66 | 80   |
| GOTERM_BP_FAT | GO:003110 | 3  | 4.347826 | 0.006859 | CCL2, PPA    | 66 | 26   |
| GOTERM_BP_FAT | GO:004354 | 7  | 10.14493 | 0.007225 | PRKCA, CA    | 66 | 357  |
| GOTERM_BP_FAT | GO:004233 | 5  | 7.246377 | 0.007293 | PRKCA, IL6   | 66 | 160  |
| GOTERM_BP_FAT | GO:000693 | 5  | 7.246377 | 0.007293 | PRKCA, IL6   | 66 | 160  |
| GOTERM_BP_FAT | GO:000635 | 10 | 14.49275 | 0.007642 | FOS, PPAR    | 66 | 727  |
| GOTERM_BP_FAT | GO:003117 | 6  | 8.695652 | 0.007658 | PRKCA, IL6   | 66 | 256  |
| GOTERM_BP_FAT | GO:004887 | 4  | 5.797101 | 0.007901 | PTGER3, B    | 66 | 85   |
| GOTERM_BP_FAT | GO:000718 | 4  | 5.797101 | 0.007901 | PTGER3, C    | 66 | 85   |
| GOTERM_BP_FAT | GO:004583 | 3  | 4.347826 | 0.007928 | IL1B, IGF2,  | 66 | 28   |
| GOTERM_BP_FAT | GO:000715 | 3  | 4.347826 | 0.007928 | VCAM1, IC    | 66 | 28   |
| GOTERM_BP_FAT | GO:005254 | 4  | 5.797101 | 0.008159 | CAV1, F3, -  | 66 | 86   |
| GOTERM_BP_FAT | GO:003003 | 7  | 10.14493 | 0.008332 | PRKCA, IL6   | 66 | 368  |
| GOTERM_BP_FAT | GO:004858 | 4  | 5.797101 | 0.008422 | CCNB1, PP    | 66 | 87   |
| GOTERM_BP_FAT | GO:000646 | 4  | 5.797101 | 0.008422 | PRKCA, CA    | 66 | 87   |
| GOTERM_BP_FAT | GO:001052 | 3  | 4.347826 | 0.008489 | CAV1, BCL    | 66 | 29   |
| GOTERM_BP_FAT | GO:004358 | 3  | 4.347826 | 0.008489 | COL3A1, T    | 66 | 29   |
| GOTERM_BP_FAT | GO:001575 | 3  | 4.347826 | 0.008489 | PPARD, SL    | 66 | 29   |
| GOTERM_BP_FAT | GO:000864 | 3  | 4.347826 | 0.009068 | PPARD, SL    | 66 | 30   |
| GOTERM_BP_FAT | GO:004352 | 4  | 5.797101 | 0.00924  | ERBB3, JUN   | 66 | 90   |
| GOTERM_BP_FAT | GO:003367 | 4  | 5.797101 | 0.00924  | PRKCA, CA    | 66 | 90   |
| GOTERM_BP_FAT | GO:000007 | 4  | 5.797101 | 0.009522 | CDK1, BIRC   | 66 | 91   |
| GOTERM_BP_FAT | GO:004581 | 2  | 2.898551 | 0.009587 | ADRA1B, IC   | 66 | 2    |
| GOTERM_BP_FAT | GO:000197 | 2  | 2.898551 | 0.009587 | ADRA1B, A    | 66 | 2    |
| GOTERM_BP_FAT | GO:000302 | 2  | 2.898551 | 0.009587 | ADRA1B, A    | 66 | 2    |
| GOTERM_BP_FAT | GO:001064 | 2  | 2.898551 | 0.009587 | F3, F7       | 66 | 2    |
| GOTERM_BP_FAT | GO:006034 | 2  | 2.898551 | 0.009587 | COL1A1, M    | 66 | 2    |
| GOTERM_BP_FAT | GO:001064 | 2  | 2.898551 | 0.009587 | F3, F7       | 66 | 2    |
| GOTERM_BP_FAT | GO:001574 | 3  | 4.347826 | 0.009663 | PPARD, SL    | 66 | 31   |
| GOTERM_BP_FAT | GO:001993 | 4  | 5.797101 | 0.010703 | PTGER3, C    | 66 | 95   |
| GOTERM_BP_FAT | GO:005134 | 5  | 7.246377 | 0.010721 | PTGER3, C    | 66 | 179  |
| GOTERM_BP_FAT | GO:000756 | 3  | 4.347826 | 0.010905 | BCL2, TP63   | 66 | 33   |
| GOTERM_BP_FAT | GO:004632 | 3  | 4.347826 | 0.010905 | PRKCA, ER    | 66 | 33   |
| GOTERM_BP_FAT | GO:003226 | 5  | 7.246377 | 0.010926 | PRKCA, CA    | 66 | 180  |
| GOTERM_BP_FAT | GO:005113 | 5  | 7.246377 | 0.011134 | PRKCA, CA    | 66 | 181  |

|               |           |    |          |          |               |    |      |
|---------------|-----------|----|----------|----------|---------------|----|------|
| GOTERM_BP_FAT | GO:004312 | 4  | 5.797101 | 0.011324 | RELA, CASI    | 66 | 97   |
| GOTERM_BP_FAT | GO:000257 | 3  | 4.347826 | 0.011551 | PPARG, CA     | 66 | 34   |
| GOTERM_BP_FAT | GO:004887 | 4  | 5.797101 | 0.012294 | IL6, BCL2, I  | 66 | 100  |
| GOTERM_BP_FAT | GO:000200 | 4  | 5.797101 | 0.012628 | BCL2, CASI    | 66 | 101  |
| GOTERM_BP_FAT | GO:004340 | 3  | 4.347826 | 0.012892 | PRKCA, CA     | 66 | 36   |
| GOTERM_BP_FAT | GO:003133 | 3  | 4.347826 | 0.012892 | ADRA1B, IL    | 66 | 36   |
| GOTERM_BP_FAT | GO:004856 | 3  | 4.347826 | 0.012892 | BCL2, RXR     | 66 | 36   |
| GOTERM_BP_FAT | GO:000716 | 17 | 24.63768 | 0.012893 | PLAT, CCL2    | 66 | 1856 |
| GOTERM_BP_FAT | GO:000717 | 4  | 5.797101 | 0.01331  | FOS, CCL2     | 66 | 103  |
| GOTERM_BP_FAT | GO:005132 | 4  | 5.797101 | 0.01331  | CCNB1, BC     | 66 | 103  |
| GOTERM_BP_FAT | GO:000155 | 5  | 7.246377 | 0.014063 | BCL2, PPAI    | 66 | 194  |
| GOTERM_BP_FAT | GO:004590 | 2  | 2.898551 | 0.014346 | CAV1, IGF2    | 66 | 3    |
| GOTERM_BP_FAT | GO:005132 | 4  | 5.797101 | 0.014373 | CCNB1, BC     | 66 | 106  |
| GOTERM_BP_FAT | GO:004210 | 3  | 4.347826 | 0.015025 | VCAM1, IL     | 66 | 39   |
| GOTERM_BP_FAT | GO:004340 | 4  | 5.797101 | 0.015483 | CAV1, IL6,    | 66 | 109  |
| GOTERM_BP_FAT | GO:005104 | 4  | 5.797101 | 0.015483 | PRKCA, IL6    | 66 | 109  |
| GOTERM_BP_FAT | GO:005071 | 3  | 4.347826 | 0.016525 | IL6, TNFSF    | 66 | 41   |
| GOTERM_BP_FAT | GO:006028 | 5  | 7.246377 | 0.016893 | RELA, BCL2    | 66 | 205  |
| GOTERM_BP_FAT | GO:000836 | 5  | 7.246377 | 0.017167 | BCL2, PPAI    | 66 | 206  |
| GOTERM_BP_FAT | GO:000164 | 3  | 4.347826 | 0.017298 | IGF2, COL1    | 66 | 42   |
| GOTERM_BP_FAT | GO:003132 | 8  | 11.5942  | 0.017689 | PRKCA, CA     | 66 | 561  |
| GOTERM_BP_FAT | GO:004866 | 5  | 7.246377 | 0.018005 | PRKCA, ER     | 66 | 209  |
| GOTERM_BP_FAT | GO:000828 | 7  | 10.14493 | 0.018031 | PPARG, CH     | 66 | 436  |
| GOTERM_BP_FAT | GO:003018 | 7  | 10.14493 | 0.0184   | PRKCA, IL6    | 66 | 438  |
| GOTERM_BP_FAT | GO:000751 | 5  | 7.246377 | 0.018577 | CAV1, ERB     | 66 | 211  |
| GOTERM_BP_FAT | GO:005086 | 4  | 5.797101 | 0.018674 | VCAM1, IL     | 66 | 117  |
| GOTERM_BP_FAT | GO:004358 | 2  | 2.898551 | 0.019083 | TP63, COL     | 66 | 4    |
| GOTERM_BP_FAT | GO:000598 | 2  | 2.898551 | 0.019083 | ADRA1B, IC    | 66 | 4    |
| GOTERM_BP_FAT | GO:000254 | 2  | 2.898551 | 0.019083 | IL6, CCL2     | 66 | 4    |
| GOTERM_BP_FAT | GO:000267 | 2  | 2.898551 | 0.019083 | PPARG, IGI    | 66 | 4    |
| GOTERM_BP_FAT | GO:000709 | 2  | 2.898551 | 0.019083 | CDK1, CCN     | 66 | 4    |
| GOTERM_BP_FAT | GO:004337 | 2  | 2.898551 | 0.019083 | BCL2, IRF1    | 66 | 4    |
| GOTERM_BP_FAT | GO:007042 | 2  | 2.898551 | 0.019083 | RELA, NFKI    | 66 | 4    |
| GOTERM_BP_FAT | GO:007043 | 2  | 2.898551 | 0.019083 | RELA, NFKI    | 66 | 4    |
| GOTERM_BP_FAT | GO:004881 | 5  | 7.246377 | 0.019161 | PRKCA, ER     | 66 | 213  |
| GOTERM_BP_FAT | GO:001470 | 4  | 5.797101 | 0.019525 | CAV1, ERB     | 66 | 119  |
| GOTERM_BP_FAT | GO:003140 | 4  | 5.797101 | 0.019525 | PRKCA, CA     | 66 | 119  |
| GOTERM_BP_FAT | GO:004583 | 3  | 4.347826 | 0.02054  | PPARG, IL1    | 66 | 46   |
| GOTERM_BP_FAT | GO:005130 | 3  | 4.347826 | 0.021387 | IL1B, IGF2,   | 66 | 47   |
| GOTERM_BP_FAT | GO:000007 | 3  | 4.347826 | 0.022249 | CDK1, CHE     | 66 | 48   |
| GOTERM_BP_FAT | GO:004210 | 3  | 4.347826 | 0.022249 | RELA, IRF1    | 66 | 48   |
| GOTERM_BP_FAT | GO:004341 | 3  | 4.347826 | 0.022249 | IL6, IL1B, IC | 66 | 48   |
| GOTERM_BP_FAT | GO:004586 | 5  | 7.246377 | 0.02225  | ADRA2A, T     | 66 | 223  |
| GOTERM_BP_FAT | GO:004860 | 4  | 5.797101 | 0.022669 | PGR, BCL2,    | 66 | 126  |
| GOTERM_BP_FAT | GO:001921 | 3  | 4.347826 | 0.023125 | CAV1, PPA     | 66 | 49   |
| GOTERM_BP_FAT | GO:004513 | 4  | 5.797101 | 0.02314  | PGR, BCL2,    | 66 | 127  |
| GOTERM_BP_FAT | GO:002261 | 2  | 2.898551 | 0.023798 | VCAM1, IC     | 66 | 5    |
| GOTERM_BP_FAT | GO:000940 | 2  | 2.898551 | 0.023798 | CYP1B1, C     | 66 | 5    |
| GOTERM_BP_FAT | GO:006005 | 2  | 2.898551 | 0.023798 | CAV1, ERB     | 66 | 5    |
| GOTERM_BP_FAT | GO:003296 | 2  | 2.898551 | 0.023798 | COL3A1, C     | 66 | 5    |
| GOTERM_BP_FAT | GO:000166 | 2  | 2.898551 | 0.023798 | PTGER3, IL    | 66 | 5    |
| GOTERM_BP_FAT | GO:000759 | 2  | 2.898551 | 0.023798 | F3, F7        | 66 | 5    |
| GOTERM_BP_FAT | GO:000195 | 2  | 2.898551 | 0.023798 | COL1A1, N     | 66 | 5    |
| GOTERM_BP_FAT | GO:004000 | 6  | 8.695652 | 0.023801 | BCL2, PPAI    | 66 | 341  |
| GOTERM_BP_FAT | GO:005508 | 3  | 4.347826 | 0.024919 | CAV1, PPA     | 66 | 51   |
| GOTERM_BP_FAT | GO:004352 | 3  | 4.347826 | 0.024919 | ERBB3, BCI    | 66 | 51   |
| GOTERM_BP_FAT | GO:003367 | 5  | 7.246377 | 0.024929 | ADRA2A, T     | 66 | 231  |
| GOTERM_BP_FAT | GO:004217 | 3  | 4.347826 | 0.025836 | RELA, GJA1    | 66 | 52   |

|               |           |   |          |          |              |    |     |
|---------------|-----------|---|----------|----------|--------------|----|-----|
| GOTERM_BP_FAT | GO:003157 | 3 | 4.347826 | 0.025836 | CDK1, CHE    | 66 | 52  |
| GOTERM_BP_FAT | GO:001922 | 6 | 8.695652 | 0.026262 | PRKCA, PL    | 66 | 350 |
| GOTERM_BP_FAT | GO:000225 | 4 | 5.797101 | 0.026582 | ICAM1, IL6   | 66 | 134 |
| GOTERM_BP_FAT | GO:004544 | 3 | 4.347826 | 0.026768 | SLC2A4, PI   | 66 | 53  |
| GOTERM_BP_FAT | GO:005080 | 4 | 5.797101 | 0.027613 | PLAT, CCL2   | 66 | 136 |
| GOTERM_BP_FAT | GO:000862 | 3 | 4.347826 | 0.027712 | PRKCA, TP    | 66 | 54  |
| GOTERM_BP_FAT | GO:004508 | 3 | 4.347826 | 0.027712 | RELA, NFKB   | 66 | 54  |
| GOTERM_BP_FAT | GO:000090 | 6 | 8.695652 | 0.027991 | PRKCA, ER    | 66 | 356 |
| GOTERM_BP_FAT | GO:003085 | 4 | 5.797101 | 0.028136 | PGR, JUN,    | 66 | 137 |
| GOTERM_BP_FAT | GO:005134 | 5 | 7.246377 | 0.028168 | ADRA2A, T    | 66 | 240 |
| GOTERM_BP_FAT | GO:006044 | 2 | 2.898551 | 0.02849  | CAV1, ERB    | 66 | 6   |
| GOTERM_BP_FAT | GO:004560 | 2 | 2.898551 | 0.02849  | PPARD, PP    | 66 | 6   |
| GOTERM_BP_FAT | GO:005090 | 2 | 2.898551 | 0.02849  | VCAM1, SE    | 66 | 6   |
| GOTERM_BP_FAT | GO:006039 | 2 | 2.898551 | 0.02849  | FOS, JUN     | 66 | 6   |
| GOTERM_BP_FAT | GO:000725 | 2 | 2.898551 | 0.02849  | IKBKB, CH    | 66 | 6   |
| GOTERM_BP_FAT | GO:000941 | 4 | 5.797101 | 0.028665 | FOS, RELA,   | 66 | 138 |
| GOTERM_BP_FAT | GO:005067 | 3 | 4.347826 | 0.02867  | VCAM1, IL    | 66 | 55  |
| GOTERM_BP_FAT | GO:003250 | 7 | 10.14493 | 0.029115 | CCNB1, PG    | 66 | 487 |
| GOTERM_BP_FAT | GO:004860 | 7 | 10.14493 | 0.029115 | CCNB1, PG    | 66 | 487 |
| GOTERM_BP_FAT | GO:004877 | 3 | 4.347826 | 0.029642 | CAV1, ERB    | 66 | 56  |
| GOTERM_BP_FAT | GO:003294 | 3 | 4.347826 | 0.029642 | VCAM1, IL    | 66 | 56  |
| GOTERM_BP_FAT | GO:007066 | 3 | 4.347826 | 0.029642 | VCAM1, IL    | 66 | 56  |
| GOTERM_BP_FAT | GO:000090 | 5 | 7.246377 | 0.029685 | PRKCA, ER    | 66 | 244 |
| GOTERM_BP_FAT | GO:004885 | 5 | 7.246377 | 0.030071 | PRKCA, ER    | 66 | 245 |
| GOTERM_BP_FAT | GO:001056 | 3 | 4.347826 | 0.030626 | CAV1, PPA    | 66 | 57  |
| GOTERM_BP_FAT | GO:004578 | 3 | 4.347826 | 0.030626 | IL1B, BIRC   | 66 | 57  |
| GOTERM_BP_FAT | GO:005070 | 3 | 4.347826 | 0.031623 | IL6, TNFSF   | 66 | 58  |
| GOTERM_BP_FAT | GO:000027 | 6 | 8.695652 | 0.032302 | CCNB1, CC    | 66 | 370 |
| GOTERM_BP_FAT | GO:005511 | 8 | 11.5942  | 0.033041 | CYP3A4, C    | 66 | 639 |
| GOTERM_BP_FAT | GO:004508 | 2 | 2.898551 | 0.03316  | RELA, IRF1   | 66 | 7   |
| GOTERM_BP_FAT | GO:003195 | 2 | 2.898551 | 0.03316  | JUN, IGF2    | 66 | 7   |
| GOTERM_BP_FAT | GO:003249 | 2 | 2.898551 | 0.03316  | IL6, NFKBIA  | 66 | 7   |
| GOTERM_BP_FAT | GO:005066 | 2 | 2.898551 | 0.03316  | CYP1A2, S    | 66 | 7   |
| GOTERM_BP_FAT | GO:000199 | 2 | 2.898551 | 0.03316  | ADRA1B, A    | 66 | 7   |
| GOTERM_BP_FAT | GO:000761 | 3 | 4.347826 | 0.033655 | FOS, JUN,    | 66 | 60  |
| GOTERM_BP_FAT | GO:001021 | 3 | 4.347826 | 0.033655 | CAV1, CCL    | 66 | 60  |
| GOTERM_BP_FAT | GO:005196 | 4 | 5.797101 | 0.033662 | PLAT, CCL2   | 66 | 147 |
| GOTERM_BP_FAT | GO:005124 | 4 | 5.797101 | 0.034244 | VCAM1, IL    | 66 | 148 |
| GOTERM_BP_FAT | GO:003299 | 5 | 7.246377 | 0.034523 | PRKCA, ER    | 66 | 256 |
| GOTERM_BP_FAT | GO:003010 | 3 | 4.347826 | 0.03469  | PRKCA, CA    | 66 | 61  |
| GOTERM_BP_FAT | GO:003132 | 3 | 4.347826 | 0.03469  | ADRA1B, IL   | 66 | 61  |
| GOTERM_BP_FAT | GO:000864 | 3 | 4.347826 | 0.03469  | PPARD, SL    | 66 | 61  |
| GOTERM_BP_FAT | GO:004212 | 3 | 4.347826 | 0.035738 | VCAM1, IL    | 66 | 62  |
| GOTERM_BP_FAT | GO:002260 | 3 | 4.347826 | 0.035738 | PGR, BCL2,   | 66 | 62  |
| GOTERM_BP_FAT | GO:000754 | 4 | 5.797101 | 0.03602  | PGR, BCL2,   | 66 | 151 |
| GOTERM_BP_FAT | GO:004576 | 3 | 4.347826 | 0.036797 | IL6, F3, IL1 | 66 | 63  |
| GOTERM_BP_FAT | GO:003087 | 3 | 4.347826 | 0.036797 | PGR, CAV1    | 66 | 63  |
| GOTERM_BP_FAT | GO:003164 | 4 | 5.797101 | 0.03723  | PLAT, CCL2   | 66 | 153 |
| GOTERM_BP_FAT | GO:003100 | 2 | 2.898551 | 0.037808 | BCL2, PPA    | 66 | 8   |
| GOTERM_BP_FAT | GO:003085 | 2 | 2.898551 | 0.037808 | CAV1, TP6    | 66 | 8   |
| GOTERM_BP_FAT | GO:004507 | 2 | 2.898551 | 0.037808 | RELA, IRF1   | 66 | 8   |
| GOTERM_BP_FAT | GO:003164 | 2 | 2.898551 | 0.037808 | PTGER3, IL   | 66 | 8   |
| GOTERM_BP_FAT | GO:006034 | 2 | 2.898551 | 0.037808 | COL1A1, N    | 66 | 8   |
| GOTERM_BP_FAT | GO:001022 | 2 | 2.898551 | 0.037808 | RELA, BCL2   | 66 | 8   |
| GOTERM_BP_FAT | GO:005123 | 3 | 4.347826 | 0.037869 | CAV1, NFK    | 66 | 64  |
| GOTERM_BP_FAT | GO:003166 | 3 | 4.347826 | 0.037869 | FOS, CAV1    | 66 | 64  |
| GOTERM_BP_FAT | GO:000858 | 3 | 4.347826 | 0.037869 | PGR, BCL2,   | 66 | 64  |
| GOTERM_BP_FAT | GO:001086 | 3 | 4.347826 | 0.038952 | PTGER3, C    | 66 | 65  |



|               |           |    |          |          |              |    |      |
|---------------|-----------|----|----------|----------|--------------|----|------|
| GOTERM_BP_FAT | GO:000720 | 3  | 4.347826 | 0.038952 | PTGER3, C    | 66 | 65   |
| GOTERM_BP_FAT | GO:000635 | 15 | 21.73913 | 0.039702 | PPARD, IL6   | 66 | 1773 |
| GOTERM_BP_FAT | GO:001087 | 4  | 5.797101 | 0.039712 | CAV1, PPA    | 66 | 157  |
| GOTERM_BP_FAT | GO:000751 | 3  | 4.347826 | 0.040047 | CAV1, ERB    | 66 | 66   |
| GOTERM_BP_FAT | GO:006053 | 3  | 4.347826 | 0.040047 | CAV1, ERB    | 66 | 66   |
| GOTERM_BP_FAT | GO:004269 | 3  | 4.347826 | 0.041154 | PGR, BCL2,   | 66 | 67   |
| GOTERM_BP_FAT | GO:003253 | 5  | 7.246377 | 0.041184 | BCL2, PPAI   | 66 | 271  |
| GOTERM_BP_FAT | GO:003298 | 6  | 8.695652 | 0.041746 | PRKCA, ER    | 66 | 397  |
| GOTERM_BP_FAT | GO:006032 | 2  | 2.898551 | 0.042434 | COL1A1, N    | 66 | 9    |
| GOTERM_BP_FAT | GO:001403 | 2  | 2.898551 | 0.042434 | ERBB3, SO    | 66 | 9    |
| GOTERM_BP_FAT | GO:004264 | 2  | 2.898551 | 0.042434 | PPARD, PT    | 66 | 9    |
| GOTERM_BP_FAT | GO:001067 | 2  | 2.898551 | 0.042434 | ADRA1B, IC   | 66 | 9    |
| GOTERM_BP_FAT | GO:000226 | 2  | 2.898551 | 0.042434 | IL6, SOD1    | 66 | 9    |
| GOTERM_BP_FAT | GO:001057 | 2  | 2.898551 | 0.042434 | IL6, IL1B    | 66 | 9    |
| GOTERM_BP_FAT | GO:004591 | 2  | 2.898551 | 0.042434 | ADRA1B, IC   | 66 | 9    |
| GOTERM_BP_FAT | GO:000197 | 2  | 2.898551 | 0.042434 | ADRA1B, A    | 66 | 9    |
| GOTERM_BP_FAT | GO:001051 | 3  | 4.347826 | 0.043402 | PTGER3, C    | 66 | 69   |
| GOTERM_BP_FAT | GO:001072 | 3  | 4.347826 | 0.043402 | RELA, BCL2   | 66 | 69   |
| GOTERM_BP_FAT | GO:000269 | 4  | 5.797101 | 0.045598 | VCAM1, IL    | 66 | 166  |
| GOTERM_BP_FAT | GO:001051 | 3  | 4.347826 | 0.045696 | PTGER3, C    | 66 | 71   |
| GOTERM_BP_FAT | GO:003238 | 3  | 4.347826 | 0.045696 | NFKBIA, IL   | 66 | 71   |
| GOTERM_BP_FAT | GO:005125 | 15 | 21.73913 | 0.046648 | PPARD, IL6   | 66 | 1813 |
| GOTERM_BP_FAT | GO:001082 | 2  | 2.898551 | 0.047038 | PRKCA, IL1   | 66 | 10   |
| GOTERM_BP_FAT | GO:004512 | 2  | 2.898551 | 0.047038 | VCAM1, SE    | 66 | 10   |
| GOTERM_BP_FAT | GO:004568 | 2  | 2.898551 | 0.047038 | RELA, PPAI   | 66 | 10   |
| GOTERM_BP_FAT | GO:001407 | 2  | 2.898551 | 0.047038 | BCL2, PPAI   | 66 | 10   |
| GOTERM_BP_FAT | GO:005114 | 2  | 2.898551 | 0.047038 | BCL2, IGFB   | 66 | 10   |
| GOTERM_BP_FAT | GO:000269 | 2  | 2.898551 | 0.047038 | IL6, F7      | 66 | 10   |
| GOTERM_BP_FAT | GO:004295 | 2  | 2.898551 | 0.047038 | PPARG, PR    | 66 | 10   |
| GOTERM_BP_FAT | GO:003110 | 2  | 2.898551 | 0.047038 | BCL2, RXR,   | 66 | 10   |
| GOTERM_BP_FAT | GO:004507 | 2  | 2.898551 | 0.047038 | IL6, IL1B    | 66 | 10   |
| GOTERM_BP_FAT | GO:002240 | 6  | 8.695652 | 0.048473 | CCNB1, CC    | 66 | 414  |
| GOTERM_BP_FAT | GO:004846 | 3  | 4.347826 | 0.050413 | CCNB1, PG    | 66 | 75   |
| GOTERM_BP_FAT | GO:000676 | 3  | 4.347826 | 0.050413 | CYP3A4, PI   | 66 | 75   |
| GOTERM_BP_FAT | GO:006019 | 3  | 4.347826 | 0.050413 | PTGER3, C    | 66 | 75   |
| GOTERM_BP_FAT | GO:005125 | 4  | 5.797101 | 0.051174 | CAV1, CAS    | 66 | 174  |
| GOTERM_BP_FAT | GO:005087 | 3  | 4.347826 | 0.051619 | VCAM1, IL    | 66 | 76   |
| GOTERM_BP_FAT | GO:001401 | 2  | 2.898551 | 0.05162  | RELA, PPAI   | 66 | 11   |
| GOTERM_BP_FAT | GO:005188 | 2  | 2.898551 | 0.05162  | BCL2, SOD    | 66 | 11   |
| GOTERM_BP_FAT | GO:000859 | 2  | 2.898551 | 0.05162  | NFKBIA, TF   | 66 | 11   |
| GOTERM_BP_FAT | GO:006032 | 2  | 2.898551 | 0.05162  | COL1A1, N    | 66 | 11   |
| GOTERM_BP_FAT | GO:006032 | 2  | 2.898551 | 0.05162  | COL1A1, N    | 66 | 11   |
| GOTERM_BP_FAT | GO:000721 | 2  | 2.898551 | 0.05162  | CHRM3, CI    | 66 | 11   |
| GOTERM_BP_FAT | GO:000178 | 2  | 2.898551 | 0.05162  | BCL2, IKBK   | 66 | 11   |
| GOTERM_BP_FAT | GO:004361 | 2  | 2.898551 | 0.05162  | PPARD, TP    | 66 | 11   |
| GOTERM_BP_FAT | GO:000268 | 2  | 2.898551 | 0.05162  | IL6, F7      | 66 | 11   |
| GOTERM_BP_FAT | GO:004645 | 2  | 2.898551 | 0.05162  | PTGS2, PTO   | 66 | 11   |
| GOTERM_BP_FAT | GO:000151 | 2  | 2.898551 | 0.05162  | PTGS2, PTO   | 66 | 11   |
| GOTERM_BP_FAT | GO:005086 | 4  | 5.797101 | 0.051894 | VCAM1, IL    | 66 | 175  |
| GOTERM_BP_FAT | GO:004328 | 3  | 4.347826 | 0.055298 | F3, TNFSF1   | 66 | 79   |
| GOTERM_BP_FAT | GO:000695 | 3  | 4.347826 | 0.055298 | IL6, CCL2, I | 66 | 79   |
| GOTERM_BP_FAT | GO:001974 | 3  | 4.347826 | 0.055298 | CYP1B1, BO   | 66 | 79   |
| GOTERM_BP_FAT | GO:001074 | 2  | 2.898551 | 0.056181 | PPARG, NF    | 66 | 12   |
| GOTERM_BP_FAT | GO:003110 | 2  | 2.898551 | 0.056181 | BCL2, RXR,   | 66 | 12   |
| GOTERM_BP_FAT | GO:005192 | 2  | 2.898551 | 0.056181 | PTGS2, BCL   | 66 | 12   |
| GOTERM_BP_FAT | GO:004668 | 2  | 2.898551 | 0.056181 | BCL2, SOD    | 66 | 12   |
| GOTERM_BP_FAT | GO:001088 | 2  | 2.898551 | 0.056181 | PPARG, NF    | 66 | 12   |
| GOTERM_BP_FAT | GO:001491 | 2  | 2.898551 | 0.056181 | BCL2, IGFB   | 66 | 12   |

|               |           |    |          |          |              |    |      |
|---------------|-----------|----|----------|----------|--------------|----|------|
| GOTERM_BP_FAT | GO:005254 | 3  | 4.347826 | 0.059066 | F3, TNFSF1   | 66 | 82   |
| GOTERM_BP_FAT | GO:000018 | 3  | 4.347826 | 0.059066 | ADRA2A, IL   | 66 | 82   |
| GOTERM_BP_FAT | GO:005067 | 3  | 4.347826 | 0.060342 | VCAM1, IL    | 66 | 83   |
| GOTERM_BP_FAT | GO:001063 | 3  | 4.347826 | 0.060342 | CAV1, IL1B   | 66 | 83   |
| GOTERM_BP_FAT | GO:003277 | 2  | 2.898551 | 0.06072  | IL1B, IGF2   | 66 | 13   |
| GOTERM_BP_FAT | GO:004255 | 2  | 2.898551 | 0.06072  | NCF1, SOC    | 66 | 13   |
| GOTERM_BP_FAT | GO:004573 | 2  | 2.898551 | 0.06072  | NCF1, IGF2   | 66 | 13   |
| GOTERM_BP_FAT | GO:004669 | 2  | 2.898551 | 0.06072  | PPARD, PT    | 66 | 13   |
| GOTERM_BP_FAT | GO:005099 | 2  | 2.898551 | 0.06072  | IL1B, IGF2   | 66 | 13   |
| GOTERM_BP_FAT | GO:004882 | 2  | 2.898551 | 0.06072  | PPARD, PT    | 66 | 13   |
| GOTERM_BP_FAT | GO:003461 | 2  | 2.898551 | 0.06072  | CASP8, SEI   | 66 | 13   |
| GOTERM_BP_FAT | GO:003157 | 2  | 2.898551 | 0.06072  | CDK1, CCN    | 66 | 13   |
| GOTERM_BP_FAT | GO:004582 | 2  | 2.898551 | 0.06072  | PRKCA, AC    | 66 | 13   |
| GOTERM_BP_FAT | GO:003294 | 3  | 4.347826 | 0.061627 | VCAM1, IL    | 66 | 84   |
| GOTERM_BP_FAT | GO:007066 | 3  | 4.347826 | 0.061627 | VCAM1, IL    | 66 | 84   |
| GOTERM_BP_FAT | GO:004544 | 19 | 27.53623 | 0.061772 | ICAM1, IL6   | 66 | 2601 |
| GOTERM_BP_FAT | GO:000650 | 10 | 14.49275 | 0.063871 | PLAT, CCN    | 66 | 1054 |
| GOTERM_BP_FAT | GO:000660 | 3  | 4.347826 | 0.064226 | JUN, NFKB    | 66 | 86   |
| GOTERM_BP_FAT | GO:005196 | 4  | 5.797101 | 0.064867 | PRKCA, RE    | 66 | 192  |
| GOTERM_BP_FAT | GO:006032 | 2  | 2.898551 | 0.065237 | COL1A1, N    | 66 | 14   |
| GOTERM_BP_FAT | GO:004663 | 2  | 2.898551 | 0.065237 | BCL2, IRF1   | 66 | 14   |
| GOTERM_BP_FAT | GO:001017 | 2  | 2.898551 | 0.065237 | COL1A1, N    | 66 | 14   |
| GOTERM_BP_FAT | GO:003072 | 2  | 2.898551 | 0.065237 | PGR, PTGS    | 66 | 14   |
| GOTERM_BP_FAT | GO:004319 | 3  | 4.347826 | 0.065539 | IL6, PPARG   | 66 | 87   |
| GOTERM_BP_FAT | GO:006019 | 3  | 4.347826 | 0.065539 | PTGER3, CI   | 66 | 87   |
| GOTERM_BP_FAT | GO:000740 | 4  | 5.797101 | 0.065673 | PRKCA, ER    | 66 | 193  |
| GOTERM_BP_FAT | GO:005117 | 3  | 4.347826 | 0.066861 | JUN, NFKB    | 66 | 88   |
| GOTERM_BP_FAT | GO:005089 | 9  | 13.04348 | 0.06863  | PRKCA, FO    | 66 | 909  |
| GOTERM_BP_FAT | GO:000181 | 3  | 4.347826 | 0.069532 | IL6, IL1B, S | 66 | 90   |
| GOTERM_BP_FAT | GO:000189 | 2  | 2.898551 | 0.069733 | PPARD, PT    | 66 | 15   |
| GOTERM_BP_FAT | GO:003264 | 2  | 2.898551 | 0.069733 | IL6, IL1B    | 66 | 15   |
| GOTERM_BP_FAT | GO:003288 | 2  | 2.898551 | 0.069733 | ADRA1B, IC   | 66 | 15   |
| GOTERM_BP_FAT | GO:000193 | 2  | 2.898551 | 0.069733 | CCL2, F3     | 66 | 15   |
| GOTERM_BP_FAT | GO:003030 | 3  | 4.347826 | 0.072237 | BCL2, PPAI   | 66 | 92   |
| GOTERM_BP_FAT | GO:000820 | 4  | 5.797101 | 0.073134 | CYP3A4, PI   | 66 | 202  |
| GOTERM_BP_FAT | GO:003009 | 3  | 4.347826 | 0.073603 | PPARG, CA    | 66 | 93   |
| GOTERM_BP_FAT | GO:004559 | 2  | 2.898551 | 0.074208 | PPARD, PP    | 66 | 16   |
| GOTERM_BP_FAT | GO:004825 | 2  | 2.898551 | 0.074208 | PRKCA, SEI   | 66 | 16   |
| GOTERM_BP_FAT | GO:004347 | 2  | 2.898551 | 0.074208 | ADRA1B, IC   | 66 | 16   |
| GOTERM_BP_FAT | GO:000202 | 2  | 2.898551 | 0.074208 | PRKCA, AC    | 66 | 16   |
| GOTERM_BP_FAT | GO:004347 | 2  | 2.898551 | 0.074208 | ADRA1B, IC   | 66 | 16   |
| GOTERM_BP_FAT | GO:003157 | 2  | 2.898551 | 0.074208 | CDK1, CCN    | 66 | 16   |
| GOTERM_BP_FAT | GO:001714 | 2  | 2.898551 | 0.074208 | CYP3A4, C    | 66 | 16   |
| GOTERM_BP_FAT | GO:003450 | 3  | 4.347826 | 0.074977 | JUN, NFKB    | 66 | 94   |
| GOTERM_BP_FAT | GO:001055 | 3  | 4.347826 | 0.074977 | RXRA, PPA    | 66 | 94   |
| GOTERM_BP_FAT | GO:006062 | 3  | 4.347826 | 0.07775  | PRKCA, CA    | 66 | 96   |
| GOTERM_BP_FAT | GO:000704 | 8  | 11.5942  | 0.077823 | CCNB1, CC    | 66 | 776  |
| GOTERM_BP_FAT | GO:003265 | 2  | 2.898551 | 0.078662 | RELA, IRF1   | 66 | 17   |
| GOTERM_BP_FAT | GO:000222 | 2  | 2.898551 | 0.078662 | RELA, NFKI   | 66 | 17   |
| GOTERM_BP_FAT | GO:005125 | 3  | 4.347826 | 0.079148 | VCAM1, IL    | 66 | 97   |
| GOTERM_BP_FAT | GO:003158 | 3  | 4.347826 | 0.080554 | PPARD, BC    | 66 | 98   |
| GOTERM_BP_FAT | GO:004579 | 3  | 4.347826 | 0.081969 | BCL2, PPAI   | 66 | 99   |
| GOTERM_BP_FAT | GO:001991 | 2  | 2.898551 | 0.083094 | CAV1, IL1B   | 66 | 18   |
| GOTERM_BP_FAT | GO:000193 | 2  | 2.898551 | 0.083094 | CAV1, TNF    | 66 | 18   |
| GOTERM_BP_FAT | GO:001810 | 2  | 2.898551 | 0.083094 | PRKCA, BC    | 66 | 18   |
| GOTERM_BP_FAT | GO:004559 | 4  | 5.797101 | 0.085458 | CAV1, PPA    | 66 | 216  |
| GOTERM_BP_FAT | GO:004340 | 3  | 4.347826 | 0.086257 | ADRA2A, IL   | 66 | 102  |
| GOTERM_BP_FAT | GO:000718 | 10 | 14.49275 | 0.087343 | CCL2, PTG    | 66 | 1123 |

|               |           |   |          |          |              |    |     |
|---------------|-----------|---|----------|----------|--------------|----|-----|
| GOTERM_BP_FAT | GO:000221 | 2 | 2.898551 | 0.087506 | RELA, NFKI   | 66 | 19  |
| GOTERM_BP_FAT | GO:000275 | 2 | 2.898551 | 0.087506 | RELA, NFKI   | 66 | 19  |
| GOTERM_BP_FAT | GO:000197 | 2 | 2.898551 | 0.087506 | ADRA1B, P    | 66 | 19  |
| GOTERM_BP_FAT | GO:000669 | 2 | 2.898551 | 0.087506 | PTGS2, PTO   | 66 | 19  |
| GOTERM_BP_FAT | GO:004259 | 2 | 2.898551 | 0.087506 | BCL2, ADR    | 66 | 19  |
| GOTERM_BP_FAT | GO:003106 | 2 | 2.898551 | 0.087506 | BCL2, TP63   | 66 | 19  |
| GOTERM_BP_FAT | GO:003275 | 2 | 2.898551 | 0.087506 | IL6, IL1B    | 66 | 19  |
| GOTERM_BP_FAT | GO:000669 | 2 | 2.898551 | 0.087506 | PTGS2, PTO   | 66 | 19  |
| GOTERM_BP_FAT | GO:001090 | 2 | 2.898551 | 0.087506 | ADRA1B, IC   | 66 | 19  |
| GOTERM_BP_FAT | GO:003009 | 3 | 4.347826 | 0.087702 | VCAM1, BC    | 66 | 103 |
| GOTERM_BP_FAT | GO:000706 | 4 | 5.797101 | 0.089134 | CCNB1, CC    | 66 | 220 |
| GOTERM_BP_FAT | GO:000028 | 4 | 5.797101 | 0.089134 | CCNB1, CC    | 66 | 220 |
| GOTERM_BP_FAT | GO:003529 | 4 | 5.797101 | 0.089134 | BCL2, CASI   | 66 | 220 |
| GOTERM_BP_FAT | GO:004231 | 2 | 2.898551 | 0.091896 | CAV1, IGF2   | 66 | 20  |
| GOTERM_BP_FAT | GO:000018 | 2 | 2.898551 | 0.091896 | PRKCA, CA    | 66 | 20  |
| GOTERM_BP_FAT | GO:003133 | 2 | 2.898551 | 0.091896 | ADRA1B, IC   | 66 | 20  |
| GOTERM_BP_FAT | GO:004591 | 2 | 2.898551 | 0.091896 | ADRA1B, IC   | 66 | 20  |
| GOTERM_BP_FAT | GO:003057 | 2 | 2.898551 | 0.091896 | MMP3, MM     | 66 | 20  |
| GOTERM_BP_FAT | GO:004568 | 2 | 2.898551 | 0.091896 | RELA, PPAI   | 66 | 20  |
| GOTERM_BP_FAT | GO:001067 | 2 | 2.898551 | 0.091896 | ADRA1B, IC   | 66 | 20  |
| GOTERM_BP_FAT | GO:000680 | 2 | 2.898551 | 0.091896 | CYP3A4, C    | 66 | 20  |
| GOTERM_BP_FAT | GO:000269 | 3 | 4.347826 | 0.092079 | VCAM1, IL    | 66 | 106 |
| GOTERM_BP_FAT | GO:000716 | 4 | 5.797101 | 0.092875 | PLAT, CCL2   | 66 | 224 |
| GOTERM_BP_FAT | GO:000008 | 4 | 5.797101 | 0.092875 | CCNB1, CC    | 66 | 224 |
| GOTERM_BP_FAT | GO:004854 | 2 | 2.898551 | 0.096266 | BCL2, TP63   | 66 | 21  |
| GOTERM_BP_FAT | GO:000183 | 2 | 2.898551 | 0.096266 | JUN, BCL2    | 66 | 21  |
| GOTERM_BP_FAT | GO:001821 | 2 | 2.898551 | 0.096266 | PRKCA, BC    | 66 | 21  |
| GOTERM_BP_FAT | GO:001088 | 2 | 2.898551 | 0.096266 | PPARG, NF    | 66 | 21  |
| GOTERM_BP_FAT | GO:000270 | 2 | 2.898551 | 0.096266 | IL1B, DPP4   | 66 | 21  |
| GOTERM_BP_FAT | GO:000008 | 2 | 2.898551 | 0.096266 | CCNB1, BIF   | 66 | 21  |
| GOTERM_BP_FAT | GO:000206 | 2 | 2.898551 | 0.096266 | PGR, TP63    | 66 | 21  |
| GOTERM_BP_FAT | GO:000165 | 2 | 2.898551 | 0.096266 | PTGER3, IL   | 66 | 21  |
| GOTERM_BP_FAT | GO:001401 | 2 | 2.898551 | 0.096266 | RELA, PPAI   | 66 | 21  |
| GOTERM_BP_FAT | GO:000940 | 2 | 2.898551 | 0.096266 | FOS, PPAR    | 66 | 21  |
| GOTERM_BP_FAT | GO:004859 | 2 | 2.898551 | 0.096266 | CCNB1, BC    | 66 | 21  |
| GOTERM_BP_FAT | GO:005512 | 2 | 2.898551 | 0.096266 | BCL2, TP63   | 66 | 21  |
| GOTERM_BP_FAT | GO:000961 | 3 | 4.347826 | 0.096519 | IL6, RELA, I | 66 | 109 |
| GOTERM_BP_FAT | GO:004828 | 4 | 5.797101 | 0.097643 | CCNB1, CC    | 66 | 229 |
| GOTERM_BP_FAT | GO:000165 | 3 | 4.347826 | 0.098012 | ODC1, BCL    | 66 | 110 |
| GOTERM_BP_FAT | GO:004592 | 3 | 4.347826 | 0.098012 | BCL2, PPAI   | 66 | 110 |
| GOTERM_BP_FAT | GO:005086 | 3 | 4.347826 | 0.099513 | VCAM1, IL    | 66 | 111 |

| Pop   | Total    | Fold Enrich | Bonferroni | Benjamini | FDR |
|-------|----------|-------------|------------|-----------|-----|
| 13528 | 7.031997 | 9.48E-13    | 9.48E-13   | 9.33E-13  |     |
| 13528 | 7.391418 | 1.52E-12    | 7.59E-13   | 1.50E-12  |     |
| 13528 | 9.615862 | 6.01E-10    | 2.00E-10   | 5.94E-10  |     |
| 13528 | 14.94571 | 9.28E-09    | 2.32E-09   | 9.17E-09  |     |
| 13528 | 26.52549 | 1.28E-08    | 2.57E-09   | 1.27E-08  |     |
| 13528 | 5.863561 | 1.46E-08    | 2.43E-09   | 1.44E-08  |     |
| 13528 | 5.805792 | 1.77E-08    | 2.53E-09   | 1.75E-08  |     |
| 13528 | 5.784421 | 1.91E-08    | 2.38E-09   | 1.88E-08  |     |
| 13528 | 10.61332 | 2.17E-08    | 2.41E-09   | 2.14E-08  |     |
| 13528 | 7.34797  | 5.46E-08    | 5.46E-09   | 5.39E-08  |     |
| 13528 | 8.41663  | 1.24E-07    | 1.13E-08   | 1.23E-07  |     |
| 13528 | 26.27817 | 1.84E-07    | 1.54E-08   | 1.82E-07  |     |
| 13528 | 25.94553 | 2.07E-07    | 1.60E-08   | 2.05E-07  |     |
| 13528 | 8.936009 | 2.46E-07    | 1.76E-08   | 2.44E-07  |     |
| 13528 | 8.685157 | 1.70E-06    | 1.13E-07   | 1.68E-06  |     |
| 13528 | 8.564193 | 2.04E-06    | 1.28E-07   | 2.02E-06  |     |
| 13528 | 8.540404 | 2.12E-06    | 1.24E-07   | 2.09E-06  |     |
| 13528 | 6.295998 | 2.43E-06    | 1.35E-07   | 2.40E-06  |     |
| 13528 | 6.805634 | 2.80E-06    | 1.47E-07   | 2.76E-06  |     |
| 13528 | 18.63361 | 4.17E-06    | 2.08E-07   | 4.12E-06  |     |
| 13528 | 11.93998 | 5.82E-06    | 2.77E-07   | 5.75E-06  |     |
| 13528 | 8.722115 | 7.39E-06    | 3.36E-07   | 7.30E-06  |     |
| 13528 | 11.38721 | 9.57E-06    | 4.16E-07   | 9.46E-06  |     |
| 13528 | 16.93964 | 9.73E-06    | 4.05E-07   | 9.61E-06  |     |
| 13528 | 11.18017 | 1.16E-05    | 4.64E-07   | 1.15E-05  |     |
| 13528 | 21.45032 | 1.23E-05    | 4.73E-07   | 1.21E-05  |     |
| 13528 | 3.916618 | 1.26E-05    | 4.67E-07   | 1.25E-05  |     |
| 13528 | 5.185651 | 1.48E-05    | 5.28E-07   | 1.46E-05  |     |
| 13528 | 4.783423 | 1.84E-05    | 6.33E-07   | 1.81E-05  |     |
| 13528 | 7.79776  | 2.82E-05    | 9.41E-07   | 2.79E-05  |     |
| 13528 | 10.08048 | 3.40E-05    | 1.10E-06   | 3.36E-05  |     |
| 13528 | 9.878058 | 4.19E-05    | 1.31E-06   | 4.14E-05  |     |
| 13528 | 11.44501 | 5.20E-05    | 1.58E-06   | 5.14E-05  |     |
| 13528 | 10.99837 | 7.59E-05    | 2.23E-06   | 7.50E-05  |     |
| 13528 | 21.29555 | 1.34E-04    | 3.82E-06   | 1.32E-04  |     |
| 13528 | 12.27363 | 1.62E-04    | 4.50E-06   | 1.60E-04  |     |
| 13528 | 7.38118  | 2.09E-04    | 5.66E-06   | 2.07E-04  |     |
| 13528 | 8.33775  | 2.36E-04    | 6.22E-06   | 2.33E-04  |     |
| 13528 | 7.201638 | 2.73E-04    | 7.01E-06   | 2.70E-04  |     |
| 13528 | 7.124615 | 3.07E-04    | 7.67E-06   | 3.03E-04  |     |
| 13528 | 7.012121 | 3.64E-04    | 8.89E-06   | 3.60E-04  |     |
| 13528 | 13.66465 | 4.27E-04    | 1.02E-05   | 4.22E-04  |     |
| 13528 | 25.62121 | 4.47E-04    | 1.04E-05   | 4.41E-04  |     |
| 13528 | 25.17172 | 4.97E-04    | 1.13E-05   | 4.91E-04  |     |
| 13528 | 10.7314  | 5.10E-04    | 1.13E-05   | 5.04E-04  |     |
| 13528 | 13.17662 | 5.64E-04    | 1.23E-05   | 5.58E-04  |     |
| 13528 | 6.514929 | 8.01E-04    | 1.71E-05   | 7.92E-04  |     |
| 13528 | 22.77441 | 9.10E-04    | 1.90E-05   | 9.00E-04  |     |
| 13528 | 12.05704 | 0.001113    | 2.27E-05   | 0.0011    |     |
| 13528 | 11.97875 | 0.001169    | 2.34E-05   | 0.001156  |     |
| 13528 | 21.73921 | 0.001203    | 2.36E-05   | 0.00119   |     |
| 13528 | 8.110312 | 0.001289    | 2.48E-05   | 0.001274  |     |
| 13528 | 11.60206 | 0.00149     | 2.81E-05   | 0.001473  |     |
| 13528 | 32.36364 | 0.00166     | 3.08E-05   | 0.001641  |     |
| 13528 | 9.191466 | 0.001872    | 3.41E-05   | 0.001852  |     |
| 13528 | 11.24834 | 0.001883    | 3.37E-05   | 0.001862  |     |
| 13528 | 4.561217 | 0.001939    | 3.40E-05   | 0.001918  |     |

|       |          |          |          |          |
|-------|----------|----------|----------|----------|
| 13528 | 19.92761 | 0.002022 | 3.49E-05 | 0.002    |
| 13528 | 4.529717 | 0.002115 | 3.59E-05 | 0.002092 |
| 13528 | 19.13051 | 0.002577 | 4.30E-05 | 0.002549 |
| 13528 | 13.55172 | 0.002973 | 4.88E-05 | 0.002941 |
| 13528 | 5.718039 | 0.003165 | 5.11E-05 | 0.003133 |
| 13528 | 8.434967 | 0.00381  | 6.06E-05 | 0.003772 |
| 13528 | 9.917889 | 0.004838 | 7.58E-05 | 0.004792 |
| 13528 | 9.917889 | 0.004838 | 7.58E-05 | 0.004792 |
| 13528 | 6.937436 | 0.005269 | 8.13E-05 | 0.00522  |
| 13528 | 9.558172 | 0.006363 | 9.67E-05 | 0.006307 |
| 13528 | 4.766737 | 0.007797 | 1.17E-04 | 0.007734 |
| 13528 | 4.696523 | 0.009159 | 1.35E-04 | 0.009091 |
| 13528 | 5.124242 | 0.009773 | 1.42E-04 | 0.009703 |
| 13528 | 4.665977 | 0.009829 | 1.41E-04 | 0.009759 |
| 13528 | 14.64069 | 0.012299 | 1.74E-04 | 0.012227 |
| 13528 | 13.66465 | 0.018262 | 2.56E-04 | 0.01821  |
| 13528 | 6.948125 | 0.018299 | 2.53E-04 | 0.018246 |
| 13528 | 9.998522 | 0.022055 | 3.01E-04 | 0.022033 |
| 13528 | 13.04353 | 0.023788 | 3.21E-04 | 0.023785 |
| 13528 | 7.917284 | 0.025096 | 3.34E-04 | 0.02511  |
| 13528 | 9.478367 | 0.031059 | 4.10E-04 | 0.03117  |
| 13528 | 17.82345 | 0.032622 | 4.25E-04 | 0.032765 |
| 13528 | 17.56883 | 0.03496  | 4.50E-04 | 0.035155 |
| 13528 | 7.529499 | 0.035864 | 4.56E-04 | 0.036081 |
| 13528 | 9.059434 | 0.041365 | 5.21E-04 | 0.041732 |
| 13528 | 7.349511 | 0.042523 | 5.30E-04 | 0.042926 |
| 13528 | 6.192438 | 0.045035 | 5.55E-04 | 0.045521 |
| 13528 | 7.262706 | 0.046211 | 5.63E-04 | 0.046737 |
| 13528 | 8.768757 | 0.050758 | 6.13E-04 | 0.051457 |
| 13528 | 16.18182 | 0.051744 | 6.18E-04 | 0.052483 |
| 13528 | 15.97166 | 0.055038 | 6.50E-04 | 0.05592  |
| 13528 | 26.27817 | 0.058327 | 6.83E-04 | 0.059363 |
| 13528 | 15.7669  | 0.058485 | 6.77E-04 | 0.059529 |
| 13528 | 5.243411 | 0.058824 | 6.73E-04 | 0.059884 |
| 13528 | 8.540404 | 0.059813 | 6.78E-04 | 0.060922 |
| 13528 | 5.207082 | 0.062285 | 6.99E-04 | 0.063522 |
| 13528 | 5.183142 | 0.064684 | 7.19E-04 | 0.066051 |
| 13528 | 8.36611  | 0.067932 | 7.48E-04 | 0.069486 |
| 13528 | 24.9963  | 0.07083  | 7.73E-04 | 0.072561 |
| 13528 | 10.70737 | 0.071105 | 7.68E-04 | 0.072853 |
| 13528 | 24.40115 | 0.077718 | 8.34E-04 | 0.079907 |
| 13528 | 24.40115 | 0.077718 | 8.34E-04 | 0.079907 |
| 13528 | 24.40115 | 0.077718 | 8.34E-04 | 0.079907 |
| 13528 | 14.81709 | 0.078146 | 8.30E-04 | 0.080366 |
| 13528 | 4.137587 | 0.079346 | 8.35E-04 | 0.081651 |
| 13528 | 6.683794 | 0.081857 | 8.54E-04 | 0.084348 |
| 13528 | 23.83369 | 0.085046 | 8.80E-04 | 0.087783 |
| 13528 | 23.83369 | 0.085046 | 8.80E-04 | 0.087783 |
| 13528 | 7.998817 | 0.089326 | 9.17E-04 | 0.092411 |
| 13528 | 51.24242 | 0.092307 | 9.40E-04 | 0.095648 |
| 13528 | 6.450095 | 0.103924 | 0.001055 | 0.108363 |
| 13528 | 13.81818 | 0.107545 | 0.001083 | 0.112359 |
| 13528 | 13.81818 | 0.107545 | 0.001083 | 0.112359 |
| 13528 | 3.994912 | 0.109549 | 0.001094 | 0.114577 |
| 13528 | 22.27931 | 0.109762 | 0.001086 | 0.114813 |
| 13528 | 4.83834  | 0.11246  | 0.001104 | 0.117809 |
| 13528 | 4.807392 | 0.118263 | 0.001154 | 0.124282 |
| 13528 | 4.756681 | 0.128445 | 0.001249 | 0.135745 |

|       |          |          |          |          |
|-------|----------|----------|----------|----------|
| 13528 | 4.746667 | 0.13056  | 0.00126  | 0.138142 |
| 13528 | 3.889936 | 0.139064 | 0.001336 | 0.147839 |
| 13528 | 43.15152 | 0.152842 | 0.001467 | 0.163755 |
| 13528 | 4.648797 | 0.153194 | 0.001458 | 0.164165 |
| 13528 | 4.648797 | 0.153194 | 0.001458 | 0.164165 |
| 13528 | 12.67854 | 0.157618 | 0.00149  | 0.169333 |
| 13528 | 3.833966 | 0.15793  | 0.001481 | 0.169698 |
| 13528 | 7.223602 | 0.162749 | 0.001517 | 0.175359 |
| 13528 | 6.008884 | 0.164669 | 0.001524 | 0.177623 |
| 13528 | 6.008884 | 0.164669 | 0.001524 | 0.177623 |
| 13528 | 12.54917 | 0.164796 | 0.001512 | 0.177773 |
| 13528 | 7.160513 | 0.171071 | 0.001562 | 0.185211 |
| 13528 | 40.99394 | 0.17673  | 0.001606 | 0.191967 |
| 13528 | 40.99394 | 0.17673  | 0.001606 | 0.191967 |
| 13528 | 12.29818 | 0.179773 | 0.001623 | 0.195618 |
| 13528 | 12.29818 | 0.179773 | 0.001623 | 0.195618 |
| 13528 | 12.29818 | 0.179773 | 0.001623 | 0.195618 |
| 13528 | 12.29818 | 0.179773 | 0.001623 | 0.195618 |
| 13528 | 4.099394 | 0.185753 | 0.001669 | 0.202834 |
| 13528 | 12.17642 | 0.187572 | 0.001674 | 0.20504  |
| 13528 | 18.97868 | 0.196624 | 0.00175  | 0.216088 |
| 13528 | 6.948125 | 0.202484 | 0.001794 | 0.223305 |
| 13528 | 11.93998 | 0.203792 | 0.001793 | 0.224924 |
| 13528 | 5.782844 | 0.209053 | 0.001831 | 0.231459 |
| 13528 | 6.86091  | 0.217043 | 0.001895 | 0.241466 |
| 13528 | 18.30087 | 0.223101 | 0.00194  | 0.249124 |
| 13528 | 8.540404 | 0.22757  | 0.001969 | 0.254808 |
| 13528 | 8.489869 | 0.234113 | 0.002019 | 0.263193 |
| 13528 | 6.611926 | 0.264637 | 0.002309 | 0.303264 |
| 13528 | 6.611926 | 0.264637 | 0.002309 | 0.303264 |
| 13528 | 5.523136 | 0.274855 | 0.002396 | 0.317047 |
| 13528 | 11.07944 | 0.276724 | 0.002397 | 0.319588 |
| 13528 | 17.08081 | 0.28135  | 0.002426 | 0.325908 |
| 13528 | 17.08081 | 0.28135  | 0.002426 | 0.325908 |
| 13528 | 34.16162 | 0.28864  | 0.002483 | 0.335949 |
| 13528 | 16.80079 | 0.29693  | 0.00255  | 0.347492 |
| 13528 | 10.69407 | 0.317692 | 0.002746 | 0.377002 |
| 13528 | 7.840371 | 0.336968 | 0.002931 | 0.405207 |
| 13528 | 7.79776  | 0.345053 | 0.002997 | 0.417281 |
| 13528 | 3.760912 | 0.353597 | 0.003068 | 0.430199 |
| 13528 | 7.63185  | 0.37824  | 0.003318 | 0.468432 |
| 13528 | 30.36588 | 0.385637 | 0.003377 | 0.480201 |
| 13528 | 9.998522 | 0.40701  | 0.003597 | 0.515014 |
| 13528 | 29.28139 | 0.419445 | 0.003718 | 0.535843 |
| 13528 | 7.434134 | 0.421394 | 0.003715 | 0.539149 |
| 13528 | 14.85288 | 0.432837 | 0.003824 | 0.558777 |
| 13528 | 28.27168 | 0.453624 | 0.004048 | 0.595458 |
| 13528 | 3.330758 | 0.470642 | 0.004232 | 0.626532 |
| 13528 | 7.209989 | 0.475051 | 0.004259 | 0.634745 |
| 13528 | 9.533474 | 0.478551 | 0.004275 | 0.641313 |
| 13528 | 4.972311 | 0.479727 | 0.004261 | 0.643528 |
| 13528 | 7.173939 | 0.484137 | 0.004289 | 0.651886 |
| 13528 | 27.32929 | 0.487944 | 0.004309 | 0.659157 |
| 13528 | 7.10291  | 0.502394 | 0.004464 | 0.68725  |
| 13528 | 9.387925 | 0.502872 | 0.004442 | 0.688193 |
| 13528 | 26.4477  | 0.522177 | 0.004663 | 0.72705  |
| 13528 | 26.4477  | 0.522177 | 0.004663 | 0.72705  |
| 13528 | 26.4477  | 0.522177 | 0.004663 | 0.72705  |

|       |          |          |          |          |
|-------|----------|----------|----------|----------|
| 13528 | 5.713441 | 0.526091 | 0.004685 | 0.735117 |
| 13528 | 9.177748 | 0.539509 | 0.004835 | 0.763286 |
| 13528 | 25.62121 | 0.556094 | 0.005032 | 0.799244 |
| 13528 | 25.62121 | 0.556094 | 0.005032 | 0.799244 |
| 13528 | 8.976775 | 0.576069 | 0.005283 | 0.844365 |
| 13528 | 8.911726 | 0.588187 | 0.005428 | 0.872772 |
| 13528 | 24.11408 | 0.622115 | 0.005916 | 0.956949 |
| 13528 | 24.11408 | 0.622115 | 0.005916 | 0.956949 |
| 13528 | 24.11408 | 0.622115 | 0.005916 | 0.956949 |
| 13528 | 8.722115 | 0.624173 | 0.005914 | 0.962293 |
| 13528 | 8.722115 | 0.624173 | 0.005914 | 0.962293 |
| 13528 | 12.65245 | 0.648492 | 0.006279 | 1.027736 |
| 13528 | 2.949204 | 0.656112 | 0.006371 | 1.049165 |
| 13528 | 2.949204 | 0.656112 | 0.006371 | 1.049165 |
| 13528 | 6.492253 | 0.674514 | 0.006659 | 1.102921 |
| 13528 | 22.77441 | 0.684405 | 0.006801 | 1.133072 |
| 13528 | 3.351003 | 0.686613 | 0.006802 | 1.139929 |
| 13528 | 3.613248 | 0.713634 | 0.007286 | 1.227968 |
| 13528 | 22.15889 | 0.713725 | 0.007246 | 1.228278 |
| 13528 | 22.15889 | 0.713725 | 0.007246 | 1.228278 |
| 13528 | 22.15889 | 0.713725 | 0.007246 | 1.228278 |
| 13528 | 6.320651 | 0.725114 | 0.007437 | 1.267889 |
| 13528 | 8.090909 | 0.747315 | 0.007875 | 1.350006 |
| 13528 | 21.02253 | 0.76805  | 0.008315 | 1.433433 |
| 13528 | 20.49697 | 0.792862 | 0.008905 | 1.543553 |
| 13528 | 6.02852  | 0.808291 | 0.009289 | 1.618828 |
| 13528 | 61.49091 | 0.818269 | 0.009534 | 1.670776 |
| 13528 | 19.52092 | 0.837484 | 0.010099 | 1.779289 |
| 13528 | 19.06695 | 0.85725  | 0.010757 | 1.90506  |
| 13528 | 10.67551 | 0.861765 | 0.010873 | 1.936211 |
| 13528 | 10.67551 | 0.861765 | 0.010873 | 1.936211 |
| 13528 | 55.90083 | 0.874812 | 0.011352 | 2.032224 |
| 13528 | 10.45764 | 0.88193  | 0.011607 | 2.088867 |
| 13528 | 10.352   | 0.891231 | 0.011985 | 2.168212 |
| 13528 | 18.21953 | 0.891743 | 0.011946 | 2.172773 |
| 13528 | 10.24848 | 0.900017 | 0.012304 | 2.249602 |
| 13528 | 17.82345 | 0.906551 | 0.012596 | 2.314853 |
| 13528 | 10.14701 | 0.908298 | 0.012628 | 2.333062 |
| 13528 | 3.634214 | 0.911658 | 0.012757 | 2.369079 |
| 13528 | 10.04753 | 0.916081 | 0.012957 | 2.418616 |
| 13528 | 10.04753 | 0.916081 | 0.012957 | 2.418616 |
| 13528 | 51.24242 | 0.916767 | 0.012932 | 2.42653  |
| 13528 | 3.621373 | 0.916828 | 0.012869 | 2.427237 |
| 13528 | 5.518415 | 0.925828 | 0.013388 | 2.537589 |
| 13528 | 17.08081 | 0.931615 | 0.013733 | 2.615781 |
| 13528 | 17.08081 | 0.931615 | 0.013733 | 2.615781 |
| 13528 | 3.267633 | 0.931683 | 0.013668 | 2.616747 |
| 13528 | 5.47629  | 0.933119 | 0.013705 | 2.637182 |
| 13528 | 16.73222 | 0.942036 | 0.014353 | 2.774748 |
| 13528 | 16.73222 | 0.942036 | 0.014353 | 2.774748 |
| 13528 | 16.73222 | 0.942036 | 0.014353 | 2.774748 |
| 13528 | 6.832323 | 0.946179 | 0.01465  | 2.845947 |
| 13528 | 47.3007  | 0.946572 | 0.014613 | 2.852986 |
| 13528 | 47.3007  | 0.946572 | 0.014613 | 2.852986 |
| 13528 | 9.578023 | 0.947981 | 0.014672 | 2.878648 |
| 13528 | 3.527878 | 0.949152 | 0.014711 | 2.900488 |
| 13528 | 9.489338 | 0.953064 | 0.015029 | 2.977271 |
| 13528 | 6.720318 | 0.956812 | 0.01536  | 3.057022 |

|       |          |          |          |          |
|-------|----------|----------|----------|----------|
| 13528 | 6.683794 | 0.959974 | 0.015652 | 3.129803 |
| 13528 | 3.867353 | 0.964206 | 0.016113 | 3.236722 |
| 13528 | 5.236452 | 0.966403 | 0.016337 | 3.297256 |
| 13528 | 4.40795  | 0.966456 | 0.016267 | 3.29877  |
| 13528 | 43.92208 | 0.966878 | 0.016249 | 3.310862 |
| 13528 | 43.92208 | 0.966878 | 0.016249 | 3.310862 |
| 13528 | 6.576568 | 0.968393 | 0.016392 | 3.355573 |
| 13528 | 9.150433 | 0.969658 | 0.016506 | 3.394576 |
| 13528 | 3.835192 | 0.970063 | 0.016491 | 3.407406 |
| 13528 | 5.198507 | 0.970398 | 0.016466 | 3.41815  |
| 13528 | 15.46941 | 0.971922 | 0.016634 | 3.468569 |
| 13528 | 15.46941 | 0.971922 | 0.016634 | 3.468569 |
| 13528 | 5.17974  | 0.972251 | 0.016611 | 3.479809 |
| 13528 | 8.989899 | 0.975977 | 0.017193 | 3.617219 |
| 13528 | 15.18294 | 0.976954 | 0.017303 | 3.656751 |
| 13528 | 15.18294 | 0.976954 | 0.017303 | 3.656751 |
| 13528 | 8.911726 | 0.978709 | 0.017583 | 3.732112 |
| 13528 | 40.99394 | 0.980163 | 0.017822 | 3.799405 |
| 13528 | 40.99394 | 0.980163 | 0.017822 | 3.799405 |
| 13528 | 14.90689 | 0.98121  | 0.017984 | 3.850909 |
| 13528 | 14.64069 | 0.984783 | 0.018844 | 4.05108  |
| 13528 | 38.43182 | 0.98852  | 0.02001  | 4.317844 |
| 13528 | 38.43182 | 0.98852  | 0.02001  | 4.317844 |
| 13528 | 38.43182 | 0.98852  | 0.02001  | 4.317844 |
| 13528 | 38.43182 | 0.98852  | 0.02001  | 4.317844 |
| 13528 | 6.179991 | 0.989194 | 0.020188 | 4.375053 |
| 13528 | 14.13584 | 0.990223 | 0.020538 | 4.469594 |
| 13528 | 8.469822 | 0.990256 | 0.020462 | 4.472712 |
| 13528 | 36.17112 | 0.993577 | 0.022186 | 4.865391 |
| 13528 | 36.17112 | 0.993577 | 0.022186 | 4.865391 |
| 13528 | 36.17112 | 0.993577 | 0.022186 | 4.865391 |
| 13528 | 36.17112 | 0.993577 | 0.022186 | 4.865391 |
| 13528 | 13.66465 | 0.993892 | 0.022305 | 4.91253  |
| 13528 | 8.198788 | 0.994533 | 0.022686 | 5.016601 |
| 13528 | 8.133718 | 0.995303 | 0.023238 | 5.158999 |
| 13528 | 34.16162 | 0.996526 | 0.024423 | 5.441239 |
| 13528 | 34.16162 | 0.996526 | 0.024423 | 5.441239 |
| 13528 | 34.16162 | 0.996526 | 0.024423 | 5.441239 |
| 13528 | 8.006629 | 0.996564 | 0.024366 | 5.451619 |
| 13528 | 5.828522 | 0.997049 | 0.024904 | 5.593667 |
| 13528 | 13.01395 | 0.997141 | 0.024931 | 5.623122 |
| 13528 | 7.88345  | 0.997518 | 0.025416 | 5.754767 |
| 13528 | 12.81061 | 0.997812 | 0.025835 | 5.87237  |
| 13528 | 12.81061 | 0.997812 | 0.025835 | 5.87237  |
| 13528 | 32.36364 | 0.998182 | 0.026495 | 6.044567 |
| 13528 | 32.36364 | 0.998182 | 0.026495 | 6.044567 |
| 13528 | 32.36364 | 0.998182 | 0.026495 | 6.044567 |
| 13528 | 5.720085 | 0.998187 | 0.026394 | 6.046864 |
| 13528 | 12.61352 | 0.998338 | 0.026643 | 6.127828 |
| 13528 | 7.705628 | 0.998511 | 0.026981 | 6.229465 |
| 13528 | 7.648123 | 0.998752 | 0.027589 | 6.393076 |
| 13528 | 7.59147  | 0.998958 | 0.028204 | 6.559395 |
| 13528 | 12.237   | 0.999063 | 0.028517 | 6.657398 |
| 13528 | 12.237   | 0.999063 | 0.028517 | 6.657398 |
| 13528 | 30.74545 | 0.99908  | 0.028476 | 6.674541 |
| 13528 | 30.74545 | 0.99908  | 0.028476 | 6.674541 |
| 13528 | 30.74545 | 0.99908  | 0.028476 | 6.674541 |
| 13528 | 12.05704 | 0.999304 | 0.029475 | 6.931514 |



|       |          |          |          |          |
|-------|----------|----------|----------|----------|
| 13528 | 12.05704 | 0.999304 | 0.029475 | 6.931514 |
| 13528 | 11.8823  | 0.999487 | 0.03057  | 7.21185  |
| 13528 | 11.8823  | 0.999487 | 0.03057  | 7.21185  |
| 13528 | 2.37155  | 0.999496 | 0.030519 | 7.228477 |
| 13528 | 29.28139 | 0.999549 | 0.030835 | 7.330315 |
| 13528 | 29.28139 | 0.999549 | 0.030835 | 7.330315 |
| 13528 | 29.28139 | 0.999549 | 0.030835 | 7.330315 |
| 13528 | 11.71255 | 0.999625 | 0.031433 | 7.498399 |
| 13528 | 7.268429 | 0.99967  | 0.031805 | 7.614771 |
| 13528 | 27.95041 | 0.999786 | 0.03337  | 8.011031 |
| 13528 | 11.23122 | 0.99986  | 0.034875 | 8.395231 |
| 13528 | 5.233269 | 0.999899 | 0.035982 | 8.687405 |
| 13528 | 11.07944 | 0.999901 | 0.035922 | 8.706522 |
| 13528 | 26.73518 | 0.999902 | 0.035822 | 8.715825 |
| 13528 | 5.211094 | 0.999914 | 0.036191 | 8.83637  |
| 13528 | 4.257531 | 0.999918 | 0.036217 | 8.875553 |
| 13528 | 4.232413 | 0.999937 | 0.037098 | 9.119393 |
| 13528 | 4.195286 | 0.999959 | 0.03852  | 9.49356  |
| 13528 | 3.219419 | 0.999962 | 0.03867  | 9.564627 |
| 13528 | 5.081893 | 0.99997  | 0.039356 | 9.764977 |
| 13528 | 4.158805 | 0.999973 | 0.039676 | 9.877886 |
| 13528 | 6.698356 | 0.999977 | 0.04014  | 10.0262  |
| 13528 | 24.59636 | 0.999981 | 0.040683 | 10.19414 |
| 13528 | 10.24848 | 0.999989 | 0.042624 | 10.70236 |
| 13528 | 23.65035 | 0.999992 | 0.043551 | 10.9659  |
| 13528 | 4.019014 | 0.999996 | 0.04566  | 11.51813 |
| 13528 | 6.405303 | 0.999996 | 0.045911 | 11.6201  |
| 13528 | 6.405303 | 0.999996 | 0.045911 | 11.6201  |
| 13528 | 2.819391 | 0.999998 | 0.047889 | 12.14342 |
| 13528 | 4.803977 | 0.999998 | 0.047811 | 12.16685 |
| 13528 | 9.645633 | 0.999999 | 0.04912  | 12.5297  |
| 13528 | 9.645633 | 0.999999 | 0.04912  | 12.5297  |
| 13528 | 21.96104 | 0.999999 | 0.049107 | 12.57019 |
| 13528 | 21.96104 | 0.999999 | 0.049107 | 12.57019 |
| 13528 | 9.533474 | 0.999999 | 0.050323 | 12.91258 |
| 13528 | 3.89888  | 0.999999 | 0.051182 | 13.16843 |
| 13528 | 9.423894 | 0.999999 | 0.051537 | 13.30114 |
| 13528 | 9.423894 | 0.999999 | 0.051537 | 13.30114 |
| 13528 | 21.20376 | 1        | 0.051758 | 13.40092 |
| 13528 | 21.20376 | 1        | 0.051758 | 13.40092 |
| 13528 | 21.20376 | 1        | 0.051758 | 13.40092 |
| 13528 | 20.49697 | 1        | 0.055006 | 14.24954 |
| 13528 | 9.109764 | 1        | 0.055827 | 14.50038 |
| 13528 | 9.109764 | 1        | 0.055827 | 14.50038 |
| 13528 | 9.009657 | 1        | 0.057291 | 14.91111 |
| 13528 | 204.9697 | 1        | 0.057468 | 15.00458 |
| 13528 | 204.9697 | 1        | 0.057468 | 15.00458 |
| 13528 | 204.9697 | 1        | 0.057468 | 15.00458 |
| 13528 | 204.9697 | 1        | 0.057468 | 15.00458 |
| 13528 | 204.9697 | 1        | 0.057468 | 15.00458 |
| 13528 | 204.9697 | 1        | 0.057468 | 15.00458 |
| 13528 | 19.83578 | 1        | 0.057713 | 15.11514 |
| 13528 | 8.630303 | 1        | 0.063535 | 16.6072  |
| 13528 | 5.725411 | 1        | 0.06342  | 16.63285 |
| 13528 | 18.63361 | 1        | 0.064256 | 16.89376 |
| 13528 | 18.63361 | 1        | 0.064256 | 16.89376 |
| 13528 | 5.693603 | 1        | 0.064156 | 16.92366 |
| 13528 | 5.662146 | 1        | 0.065117 | 17.21708 |

|       |          |   |          |          |
|-------|----------|---|----------|----------|
| 13528 | 8.452359 | 1 | 0.065977 | 17.48615 |
| 13528 | 18.08556 | 1 | 0.067033 | 17.80501 |
| 13528 | 8.198788 | 1 | 0.070974 | 18.84152 |
| 13528 | 8.117612 | 1 | 0.072597 | 19.30284 |
| 13528 | 17.08081 | 1 | 0.073823 | 19.66704 |
| 13528 | 17.08081 | 1 | 0.073823 | 19.66704 |
| 13528 | 17.08081 | 1 | 0.073823 | 19.66704 |
| 13528 | 1.877416 | 1 | 0.073583 | 19.6684  |
| 13528 | 7.959988 | 1 | 0.075636 | 20.23924 |
| 13528 | 7.959988 | 1 | 0.075636 | 20.23924 |
| 13528 | 5.282724 | 1 | 0.079506 | 21.2602  |
| 13528 | 136.6465 | 1 | 0.080786 | 21.64091 |
| 13528 | 7.734706 | 1 | 0.080668 | 21.67695 |
| 13528 | 15.7669  | 1 | 0.083919 | 22.546   |
| 13528 | 7.521824 | 1 | 0.086106 | 23.15217 |
| 13528 | 7.521824 | 1 | 0.086106 | 23.15217 |
| 13528 | 14.99778 | 1 | 0.091377 | 24.51279 |
| 13528 | 4.999261 | 1 | 0.093035 | 24.9886  |
| 13528 | 4.974993 | 1 | 0.09418  | 25.34023 |
| 13528 | 14.64069 | 1 | 0.094569 | 25.50797 |
| 13528 | 2.922919 | 1 | 0.096312 | 26.00624 |
| 13528 | 4.903581 | 1 | 0.097652 | 26.40691 |
| 13528 | 3.290798 | 1 | 0.097484 | 26.44064 |
| 13528 | 3.275771 | 1 | 0.099081 | 26.90503 |
| 13528 | 4.857102 | 1 | 0.099684 | 27.12756 |
| 13528 | 7.007511 | 1 | 0.099873 | 27.24937 |
| 13528 | 102.4848 | 1 | 0.101651 | 27.75953 |
| 13528 | 102.4848 | 1 | 0.101651 | 27.75953 |
| 13528 | 102.4848 | 1 | 0.101651 | 27.75953 |
| 13528 | 102.4848 | 1 | 0.101651 | 27.75953 |
| 13528 | 102.4848 | 1 | 0.101651 | 27.75953 |
| 13528 | 102.4848 | 1 | 0.101651 | 27.75953 |
| 13528 | 102.4848 | 1 | 0.101651 | 27.75953 |
| 13528 | 102.4848 | 1 | 0.101651 | 27.75953 |
| 13528 | 102.4848 | 1 | 0.101651 | 27.75953 |
| 13528 | 4.811495 | 1 | 0.101731 | 27.85553 |
| 13528 | 6.889738 | 1 | 0.103262 | 28.30631 |
| 13528 | 6.889738 | 1 | 0.103262 | 28.30631 |
| 13528 | 13.36759 | 1 | 0.108053 | 29.54888 |
| 13528 | 13.08317 | 1 | 0.111955 | 30.57035 |
| 13528 | 12.81061 | 1 | 0.115891 | 31.59485 |
| 13528 | 12.81061 | 1 | 0.115891 | 31.59485 |
| 13528 | 12.81061 | 1 | 0.115891 | 31.59485 |
| 13528 | 4.595733 | 1 | 0.115547 | 31.59573 |
| 13528 | 6.506975 | 1 | 0.117264 | 32.08928 |
| 13528 | 12.54917 | 1 | 0.119144 | 32.62167 |
| 13528 | 6.455738 | 1 | 0.118862 | 32.63886 |
| 13528 | 81.98788 | 1 | 0.121706 | 33.40077 |
| 13528 | 81.98788 | 1 | 0.121706 | 33.40077 |
| 13528 | 81.98788 | 1 | 0.121706 | 33.40077 |
| 13528 | 81.98788 | 1 | 0.121706 | 33.40077 |
| 13528 | 81.98788 | 1 | 0.121706 | 33.40077 |
| 13528 | 81.98788 | 1 | 0.121706 | 33.40077 |
| 13528 | 81.98788 | 1 | 0.121706 | 33.40077 |
| 13528 | 3.606505 | 1 | 0.121364 | 33.40466 |
| 13528 | 12.05704 | 1 | 0.126381 | 34.67952 |
| 13528 | 12.05704 | 1 | 0.126381 | 34.67952 |
| 13528 | 4.436574 | 1 | 0.126062 | 34.69118 |
| 13528 | 11.82517 | 1 | 0.130015 | 35.70922 |

|       |          |   |          |          |
|-------|----------|---|----------|----------|
| 13528 | 11.82517 | 1 | 0.130015 | 35.70922 |
| 13528 | 3.513766 | 1 | 0.131655 | 36.18178 |
| 13528 | 6.118498 | 1 | 0.132781 | 36.53426 |
| 13528 | 11.60206 | 1 | 0.133273 | 36.73858 |
| 13528 | 6.02852  | 1 | 0.136842 | 37.65941 |
| 13528 | 11.38721 | 1 | 0.136915 | 37.76697 |
| 13528 | 11.38721 | 1 | 0.136915 | 37.76697 |
| 13528 | 3.454545 | 1 | 0.137816 | 38.06676 |
| 13528 | 5.984517 | 1 | 0.1381   | 38.22345 |
| 13528 | 4.270202 | 1 | 0.137856 | 38.25732 |
| 13528 | 68.32323 | 1 | 0.138947 | 38.60187 |
| 13528 | 68.32323 | 1 | 0.138947 | 38.60187 |
| 13528 | 68.32323 | 1 | 0.138947 | 38.60187 |
| 13528 | 68.32323 | 1 | 0.138947 | 38.60187 |
| 13528 | 68.32323 | 1 | 0.138947 | 38.60187 |
| 13528 | 5.941151 | 1 | 0.139359 | 38.78833 |
| 13528 | 11.18017 | 1 | 0.138993 | 38.79379 |
| 13528 | 2.946176 | 1 | 0.140626 | 39.26469 |
| 13528 | 2.946176 | 1 | 0.140626 | 39.26469 |
| 13528 | 10.98052 | 1 | 0.142619 | 39.81845 |
| 13528 | 10.98052 | 1 | 0.142619 | 39.81845 |
| 13528 | 10.98052 | 1 | 0.142619 | 39.81845 |
| 13528 | 4.200199 | 1 | 0.142419 | 39.86356 |
| 13528 | 4.183055 | 1 | 0.143763 | 40.2667  |
| 13528 | 10.78788 | 1 | 0.145848 | 40.84038 |
| 13528 | 10.78788 | 1 | 0.145848 | 40.84038 |
| 13528 | 10.60188 | 1 | 0.149882 | 41.85904 |
| 13528 | 3.323833 | 1 | 0.152475 | 42.54305 |
| 13528 | 2.566131 | 1 | 0.155312 | 43.27936 |
| 13528 | 58.56277 | 1 | 0.155414 | 43.39712 |
| 13528 | 58.56277 | 1 | 0.155414 | 43.39712 |
| 13528 | 58.56277 | 1 | 0.155414 | 43.39712 |
| 13528 | 58.56277 | 1 | 0.155414 | 43.39712 |
| 13528 | 58.56277 | 1 | 0.155414 | 43.39712 |
| 13528 | 10.24848 | 1 | 0.157156 | 43.8844  |
| 13528 | 10.24848 | 1 | 0.157156 | 43.8844  |
| 13528 | 5.577407 | 1 | 0.156767 | 43.89129 |
| 13528 | 5.539722 | 1 | 0.158866 | 44.45842 |
| 13528 | 4.003314 | 1 | 0.159648 | 44.72859 |
| 13528 | 10.08048 | 1 | 0.159944 | 44.89009 |
| 13528 | 10.08048 | 1 | 0.159944 | 44.89009 |
| 13528 | 10.08048 | 1 | 0.159944 | 44.89009 |
| 13528 | 9.917889 | 1 | 0.164001 | 45.89049 |
| 13528 | 9.917889 | 1 | 0.164001 | 45.89049 |
| 13528 | 5.429661 | 1 | 0.164772 | 46.15721 |
| 13528 | 9.760462 | 1 | 0.167633 | 46.88513 |
| 13528 | 9.760462 | 1 | 0.167633 | 46.88513 |
| 13528 | 5.358685 | 1 | 0.169021 | 47.28654 |
| 13528 | 51.24242 | 1 | 0.171009 | 47.81817 |
| 13528 | 51.24242 | 1 | 0.171009 | 47.81817 |
| 13528 | 51.24242 | 1 | 0.171009 | 47.81817 |
| 13528 | 51.24242 | 1 | 0.171009 | 47.81817 |
| 13528 | 51.24242 | 1 | 0.171009 | 47.81817 |
| 13528 | 9.607955 | 1 | 0.170821 | 47.87357 |
| 13528 | 9.607955 | 1 | 0.170821 | 47.87357 |
| 13528 | 9.607955 | 1 | 0.170821 | 47.87357 |
| 13528 | 9.46014  | 1 | 0.174891 | 48.85539 |

[illegible]

|       |          |   |          |          |
|-------|----------|---|----------|----------|
| 13528 | 7.498891 | 1 | 0.242735 | 64.20902 |
| 13528 | 7.498891 | 1 | 0.242735 | 64.20902 |
| 13528 | 7.408543 | 1 | 0.246842 | 65.01919 |
| 13528 | 7.408543 | 1 | 0.246842 | 65.01919 |
| 13528 | 31.5338  | 1 | 0.247649 | 65.25569 |
| 13528 | 31.5338  | 1 | 0.247649 | 65.25569 |
| 13528 | 31.5338  | 1 | 0.247649 | 65.25569 |
| 13528 | 31.5338  | 1 | 0.247649 | 65.25569 |
| 13528 | 31.5338  | 1 | 0.247649 | 65.25569 |
| 13528 | 31.5338  | 1 | 0.247649 | 65.25569 |
| 13528 | 31.5338  | 1 | 0.247649 | 65.25569 |
| 13528 | 31.5338  | 1 | 0.247649 | 65.25569 |
| 13528 | 7.320346 | 1 | 0.250371 | 65.81793 |
| 13528 | 7.320346 | 1 | 0.250371 | 65.81793 |
| 13528 | 1.49728  | 1 | 0.250323 | 65.90695 |
| 13528 | 1.944684 | 1 | 0.257286 | 67.17125 |
| 13528 | 7.150106 | 1 | 0.25797  | 67.38071 |
| 13528 | 4.270202 | 1 | 0.259669 | 67.75609 |
| 13528 | 29.28139 | 1 | 0.260395 | 67.9706  |
| 13528 | 29.28139 | 1 | 0.260395 | 67.9706  |
| 13528 | 29.28139 | 1 | 0.260395 | 67.9706  |
| 13528 | 29.28139 | 1 | 0.260395 | 67.9706  |
| 13528 | 7.067921 | 1 | 0.260877 | 68.1446  |
| 13528 | 7.067921 | 1 | 0.260877 | 68.1446  |
| 13528 | 4.248077 | 1 | 0.260768 | 68.2219  |
| 13528 | 6.987603 | 1 | 0.26435  | 68.89671 |
| 13528 | 2.029403 | 1 | 0.269921 | 69.87707 |
| 13528 | 6.832323 | 1 | 0.272444 | 70.36545 |
| 13528 | 27.32929 | 1 | 0.272542 | 70.47355 |
| 13528 | 27.32929 | 1 | 0.272542 | 70.47355 |
| 13528 | 27.32929 | 1 | 0.272542 | 70.47355 |
| 13528 | 27.32929 | 1 | 0.272542 | 70.47355 |
| 13528 | 6.683794 | 1 | 0.280512 | 71.78663 |
| 13528 | 4.058806 | 1 | 0.282949 | 72.24347 |
| 13528 | 6.611926 | 1 | 0.283922 | 72.47933 |
| 13528 | 25.62121 | 1 | 0.285349 | 72.78107 |
| 13528 | 25.62121 | 1 | 0.285349 | 72.78107 |
| 13528 | 25.62121 | 1 | 0.285349 | 72.78107 |
| 13528 | 25.62121 | 1 | 0.285349 | 72.78107 |
| 13528 | 25.62121 | 1 | 0.285349 | 72.78107 |
| 13528 | 25.62121 | 1 | 0.285349 | 72.78107 |
| 13528 | 25.62121 | 1 | 0.285349 | 72.78107 |
| 13528 | 6.541586 | 1 | 0.287316 | 73.16012 |
| 13528 | 6.541586 | 1 | 0.287316 | 73.16012 |
| 13528 | 6.405303 | 1 | 0.295925 | 74.48595 |
| 13528 | 2.11309  | 1 | 0.295541 | 74.52011 |
| 13528 | 24.11408 | 1 | 0.29768  | 74.90841 |
| 13528 | 24.11408 | 1 | 0.29768  | 74.90841 |
| 13528 | 6.339269 | 1 | 0.29865  | 75.13105 |
| 13528 | 6.274583 | 1 | 0.302614 | 75.76432 |
| 13528 | 6.211203 | 1 | 0.306568 | 76.38579 |
| 13528 | 22.77441 | 1 | 0.309559 | 76.86962 |
| 13528 | 22.77441 | 1 | 0.309559 | 76.86962 |
| 13528 | 22.77441 | 1 | 0.309559 | 76.86962 |
| 13528 | 3.795735 | 1 | 0.316479 | 77.85584 |
| 13528 | 6.02852  | 1 | 0.318367 | 78.18    |
| 13528 | 1.825198 | 1 | 0.321147 | 78.61332 |

|       |          |   |          |          |
|-------|----------|---|----------|----------|
| 13528 | 21.57576 | 1 | 0.321008 | 78.67767 |
| 13528 | 21.57576 | 1 | 0.321008 | 78.67767 |
| 13528 | 21.57576 | 1 | 0.321008 | 78.67767 |
| 13528 | 21.57576 | 1 | 0.321008 | 78.67767 |
| 13528 | 21.57576 | 1 | 0.321008 | 78.67767 |
| 13528 | 21.57576 | 1 | 0.321008 | 78.67767 |
| 13528 | 21.57576 | 1 | 0.321008 | 78.67767 |
| 13528 | 21.57576 | 1 | 0.321008 | 78.67767 |
| 13528 | 21.57576 | 1 | 0.321008 | 78.67767 |
| 13528 | 5.969991 | 1 | 0.320975 | 78.75488 |
| 13528 | 3.726722 | 1 | 0.324804 | 79.31074 |
| 13528 | 3.726722 | 1 | 0.324804 | 79.31074 |
| 13528 | 3.726722 | 1 | 0.324804 | 79.31074 |
| 13528 | 20.49697 | 1 | 0.332712 | 80.34451 |
| 13528 | 20.49697 | 1 | 0.332712 | 80.34451 |
| 13528 | 20.49697 | 1 | 0.332712 | 80.34451 |
| 13528 | 20.49697 | 1 | 0.332712 | 80.34451 |
| 13528 | 20.49697 | 1 | 0.332712 | 80.34451 |
| 13528 | 20.49697 | 1 | 0.332712 | 80.34451 |
| 13528 | 20.49697 | 1 | 0.332712 | 80.34451 |
| 13528 | 20.49697 | 1 | 0.332712 | 80.34451 |
| 13528 | 5.801029 | 1 | 0.332612 | 80.41108 |
| 13528 | 3.660173 | 1 | 0.334396 | 80.69915 |
| 13528 | 3.660173 | 1 | 0.334396 | 80.69915 |
| 13528 | 19.52092 | 1 | 0.344048 | 81.88115 |
| 13528 | 19.52092 | 1 | 0.344048 | 81.88115 |
| 13528 | 19.52092 | 1 | 0.344048 | 81.88115 |
| 13528 | 19.52092 | 1 | 0.344048 | 81.88115 |
| 13528 | 19.52092 | 1 | 0.344048 | 81.88115 |
| 13528 | 19.52092 | 1 | 0.344048 | 81.88115 |
| 13528 | 19.52092 | 1 | 0.344048 | 81.88115 |
| 13528 | 19.52092 | 1 | 0.344048 | 81.88115 |
| 13528 | 19.52092 | 1 | 0.344048 | 81.88115 |
| 13528 | 19.52092 | 1 | 0.344048 | 81.88115 |
| 13528 | 19.52092 | 1 | 0.344048 | 81.88115 |
| 13528 | 19.52092 | 1 | 0.344048 | 81.88115 |
| 13528 | 19.52092 | 1 | 0.344048 | 81.88115 |
| 13528 | 19.52092 | 1 | 0.344048 | 81.88115 |
| 13528 | 5.641368 | 1 | 0.344138 | 81.96653 |
| 13528 | 3.580257 | 1 | 0.346848 | 82.34163 |
| 13528 | 5.590083 | 1 | 0.347279 | 82.4631  |
| 13528 | 5.590083 | 1 | 0.347279 | 82.4631  |
| 13528 | 5.539722 | 1 | 0.351078 | 82.94891 |

| Category          | Term | Count | %        | PValue   | Genes      | List Total | Pop Hits | Pop Total |
|-------------------|------|-------|----------|----------|------------|------------|----------|-----------|
| GOTERM_(GO:000561 |      | 17    | 24.63768 | 1.70E-07 | PLAT, ICAM | 65         | 685      | 12782     |
| GOTERM_(GO:000562 |      | 17    | 24.63768 | 1.58E-06 | PRKCA, CY  | 65         | 809      | 12782     |
| GOTERM_(GO:000579 |      | 10    | 14.49275 | 2.52E-06 | CYP3A4, C  | 65         | 237      | 12782     |
| GOTERM_(GO:000562 |      | 17    | 24.63768 | 2.55E-06 | PRKCA, CY  | 65         | 839      | 12782     |
| GOTERM_(GO:004442 |      | 18    | 26.08696 | 3.16E-06 | PLAT, ICAM | 65         | 960      | 12782     |
| GOTERM_(GO:004259 |      | 10    | 14.49275 | 3.20E-06 | CYP3A4, C  | 65         | 244      | 12782     |
| GOTERM_(GO:000026 |      | 19    | 27.53623 | 3.69E-06 | PRKCA, CY  | 65         | 1083     | 12782     |
| GOTERM_(GO:000582 |      | 21    | 30.43478 | 4.22E-06 | PRKCA, OC  | 65         | 1330     | 12782     |
| GOTERM_(GO:003122 |      | 19    | 27.53623 | 1.83E-05 | ICAM1, CA  | 65         | 1215     | 12782     |
| GOTERM_(GO:000588 |      | 18    | 26.08696 | 5.20E-05 | ICAM1, CA  | 65         | 1188     | 12782     |
| GOTERM_(GO:004512 |      | 7     | 10.14493 | 7.76E-05 | PRKCA, CA  | 65         | 143      | 12782     |
| GOTERM_(GO:004445 |      | 25    | 36.23188 | 8.66E-05 | CAV1, PTG  | 65         | 2203     | 12782     |
| GOTERM_(GO:000557 |      | 23    | 33.33333 | 1.85E-04 | PLAT, ICAM | 65         | 2010     | 12782     |
| GOTERM_(GO:000588 |      | 33    | 47.82609 | 4.52E-04 | CAV1, PTG  | 65         | 3777     | 12782     |
| GOTERM_(GO:001250 |      | 12    | 17.3913  | 0.001581 | CYP3A4, C. | 65         | 782      | 12782     |
| GOTERM_(GO:000029 |      | 3     | 4.347826 | 0.002831 | CAV1, SLC  | 65         | 16       | 12782     |
| GOTERM_(GO:000998 |      | 7     | 10.14493 | 0.007756 | CYP3A4, V  | 65         | 348      | 12782     |
| GOTERM_(GO:000587 |      | 3     | 4.347826 | 0.009185 | CDK1, BIRC | 65         | 29       | 12782     |
| GOTERM_(GO:000574 |      | 4     | 5.797101 | 0.010322 | BCL2, MAC  | 65         | 90       | 12782     |
| GOTERM_(GO:004517 |      | 5     | 7.246377 | 0.012306 | PLAT, VCA  | 65         | 179      | 12782     |
| GOTERM_(GO:003196 |      | 4     | 5.797101 | 0.015229 | BCL2, MAC  | 65         | 104      | 12782     |
| GOTERM_(GO:001986 |      | 4     | 5.797101 | 0.016835 | BCL2, MAC  | 65         | 108      | 12782     |
| GOTERM_(GO:000562 |      | 6     | 8.695652 | 0.020047 | CAV1, SLC  | 65         | 313      | 12782     |
| GOTERM_(GO:000578 |      | 11    | 15.94203 | 0.020227 | CYP3A4, C. | 65         | 960      | 12782     |
| GOTERM_(GO:000595 |      | 2     | 2.898551 | 0.02479  | BCL2, PPP3 | 65         | 5        | 12782     |
| GOTERM_(GO:000590 |      | 3     | 4.347826 | 0.027872 | CAV1, PTG  | 65         | 52       | 12782     |
| GOTERM_(GO:003101 |      | 6     | 8.695652 | 0.028991 | F3, COL3A  | 65         | 345      | 12782     |
| GOTERM_(GO:004443 |      | 6     | 8.695652 | 0.029622 | CYP3A4, C  | 65         | 347      | 12782     |
| GOTERM_(GO:001989 |      | 7     | 10.14493 | 0.036663 | PRKCA, CY  | 65         | 494      | 12782     |
| GOTERM_(GO:003227 |      | 2     | 2.898551 | 0.044185 | CHRM3, CI  | 65         | 9        | 12782     |
| GOTERM_(GO:000577 |      | 2     | 2.898551 | 0.044185 | SLC2A4, G. | 65         | 9        | 12782     |
| GOTERM_(GO:000578 |      | 5     | 7.246377 | 0.04562  | CYP3A4, C  | 65         | 269      | 12782     |
| GOTERM_(GO:003042 |      | 4     | 5.797101 | 0.048213 | CHRM3, CI  | 65         | 163      | 12782     |
| GOTERM_(GO:000989 |      | 4     | 5.797101 | 0.053423 | VCAM1, IC  | 65         | 170      | 12782     |
| GOTERM_(GO:004217 |      | 5     | 7.246377 | 0.053728 | CYP3A4, C  | 65         | 284      | 12782     |
| GOTERM_(GO:000558 |      | 2     | 2.898551 | 0.058482 | COL3A1, C  | 65         | 12       | 12782     |
| GOTERM_(GO:001470 |      | 2     | 2.898551 | 0.072568 | GJA1, SCN  | 65         | 15       | 12782     |
| GOTERM_(GO:000563 |      | 4     | 5.797101 | 0.083267 | PTGER3, B  | 65         | 205      | 12782     |
| GOTERM_(GO:003049 |      | 2     | 2.898551 | 0.086447 | CDK1, BIRC | 65         | 18       | 12782     |
| GOTERM_(GO:003196 |      | 7     | 10.14493 | 0.089173 | PTGER3, B  | 65         | 620      | 12782     |
| GOTERM_(GO:003197 |      | 7     | 10.14493 | 0.090232 | PTGER3, B  | 65         | 622      | 12782     |
| GOTERM_(GO:004300 |      | 5     | 7.246377 | 0.091903 | CHRM3, CI  | 65         | 342      | 12782     |
| GOTERM_(GO:003109 |      | 10    | 14.49275 | 0.094494 | CYP3A4, C. | 65         | 1096     | 12782     |

| Fold Enrich | Bonferroni | Benjamini | FDR      |
|-------------|------------|-----------|----------|
| 4.88027     | 3.33E-05   | 3.33E-05  | 2.12E-04 |
| 4.132243    | 3.10E-04   | 1.55E-04  | 0.001975 |
| 8.297306    | 4.94E-04   | 1.65E-04  | 0.003152 |
| 3.984487    | 4.99E-04   | 1.25E-04  | 0.00318  |
| 3.687115    | 6.18E-04   | 1.24E-04  | 0.003943 |
| 8.059269    | 6.28E-04   | 1.05E-04  | 0.004004 |
| 3.449933    | 7.23E-04   | 1.03E-04  | 0.00461  |
| 3.104939    | 8.27E-04   | 1.03E-04  | 0.005272 |
| 3.075125    | 0.003577   | 3.98E-04  | 0.022838 |
| 2.979487    | 0.010144   | 0.001019  | 0.064961 |
| 9.626036    | 0.015099   | 0.001382  | 0.096926 |
| 2.231572    | 0.016823   | 0.001413  | 0.108077 |
| 2.25018     | 0.035519   | 0.002778  | 0.230243 |
| 1.718116    | 0.084833   | 0.006312  | 0.563428 |
| 3.017588    | 0.266593   | 0.020458  | 1.956805 |
| 36.87115    | 0.426269   | 0.034129  | 3.479237 |
| 3.955526    | 0.782632   | 0.085863  | 9.269206 |
| 20.34271    | 0.836107   | 0.095592  | 10.88757 |
| 8.739829    | 0.869129   | 0.1015    | 12.15641 |
| 5.492909    | 0.911691   | 0.114272  | 14.33145 |
| 7.563314    | 0.950606   | 0.133449  | 17.44589 |
| 7.283191    | 0.964127   | 0.140378  | 19.11185 |
| 3.769575    | 0.981112   | 0.158505  | 22.35223 |
| 2.253237    | 0.981777   | 0.153697  | 22.52946 |
| 78.65846    | 0.992701   | 0.178645  | 26.91791 |
| 11.34497    | 0.996075   | 0.19192   | 29.75163 |
| 3.419933    | 0.996868   | 0.192299  | 30.75526 |
| 3.400222    | 0.997243   | 0.18981   | 31.31527 |
| 2.786484    | 0.999338   | 0.223101  | 37.28779 |
| 43.69915    | 0.999858   | 0.255652  | 43.13812 |
| 43.69915    | 0.999858   | 0.255652  | 43.13812 |
| 3.655133    | 0.999894   | 0.255634  | 44.19552 |
| 4.825672    | 0.999938   | 0.261151  | 46.06044 |
| 4.626968    | 0.999979   | 0.278262  | 49.63535 |
| 3.46208     | 0.99998    | 0.272656  | 49.83725 |
| 32.77436    | 0.999993   | 0.286422  | 52.89614 |
| 26.21949    | 1          | 0.336456  | 60.98133 |
| 3.836998    | 1          | 0.369059  | 66.24649 |
| 21.84957    | 1          | 0.372708  | 67.68016 |
| 2.220199    | 1          | 0.374626  | 68.8646  |
| 2.21306     | 1          | 0.370843  | 69.31407 |
| 2.874944    | 1          | 0.369258  | 70.01065 |
| 1.794217    | 1          | 0.370745  | 71.06217 |



| Category | Term      | Count | %        | PValue   | Genes        | List Total | Pop Hits | Pop Total |
|----------|-----------|-------|----------|----------|--------------|------------|----------|-----------|
| GOTERM_  | GO:000828 | 13    | 18.84058 | 1.97E-06 | PRKCA, CY    | 66         | 450      | 12983     |
| GOTERM_  | GO:004280 | 15    | 21.73913 | 2.56E-06 | CAV1, ERB    | 66         | 640      | 12983     |
| GOTERM_  | GO:000487 | 6     | 8.695652 | 1.00E-05 | PGR, PPAR    | 66         | 58       | 12983     |
| GOTERM_  | GO:000822 | 5     | 7.246377 | 5.04E-05 | CHRM3, CI    | 66         | 41       | 12983     |
| GOTERM_  | GO:004698 | 12    | 17.3913  | 7.00E-05 | FOS, ERBB3   | 66         | 542      | 12983     |
| GOTERM_  | GO:000370 | 5     | 7.246377 | 1.02E-04 | PGR, PPAR    | 66         | 49       | 12983     |
| GOTERM_  | GO:000814 | 5     | 7.246377 | 1.85E-04 | PPARD, CH    | 66         | 57       | 12983     |
| GOTERM_  | GO:000549 | 5     | 7.246377 | 2.90E-04 | CYP3A4, PI   | 66         | 64       | 12983     |
| GOTERM_  | GO:000493 | 3     | 4.347826 | 3.65E-04 | ADRA2A, A    | 66         | 6        | 12983     |
| GOTERM_  | GO:004698 | 7     | 10.14493 | 5.92E-04 | FOS, ERBB3   | 66         | 208      | 12983     |
| GOTERM_  | GO:000493 | 3     | 4.347826 | 0.001082 | ADRA2A, A    | 66         | 10       | 12983     |
| GOTERM_  | GO:001983 | 5     | 7.246377 | 0.001873 | ERBB3, CO    | 66         | 105      | 12983     |
| GOTERM_  | GO:003240 | 6     | 8.695652 | 0.002956 | VCAM1, IC    | 66         | 196      | 12983     |
| GOTERM_  | GO:004356 | 10    | 14.49275 | 0.003092 | PGR, FOS,    | 66         | 607      | 12983     |
| GOTERM_  | GO:002003 | 5     | 7.246377 | 0.003136 | CYP3A4, C    | 66         | 121      | 12983     |
| GOTERM_  | GO:004690 | 5     | 7.246377 | 0.003945 | CYP3A4, C    | 66         | 129      | 12983     |
| GOTERM_  | GO:004280 | 7     | 10.14493 | 0.006398 | ERBB3, BCL   | 66         | 334      | 12983     |
| GOTERM_  | GO:005105 | 3     | 4.347826 | 0.009185 | PPARD, RE    | 66         | 29       | 12983     |
| GOTERM_  | GO:001671 | 3     | 4.347826 | 0.009809 | CYP3A4, C    | 66         | 30       | 12983     |
| GOTERM_  | GO:000466 | 2     | 2.898551 | 0.009988 | PTGS2, PTG   | 66         | 2        | 12983     |
| GOTERM_  | GO:000467 | 9     | 13.04348 | 0.010404 | PRKCA, CD    | 66         | 606      | 12983     |
| GOTERM_  | GO:000369 | 4     | 5.797101 | 0.012641 | FOS, JUN, I  | 66         | 97       | 12983     |
| GOTERM_  | GO:000493 | 2     | 2.898551 | 0.014946 | ADRA1B, A    | 66         | 3        | 12983     |
| GOTERM_  | GO:000838 | 2     | 2.898551 | 0.014946 | IKBKB, CHL   | 66         | 3        | 12983     |
| GOTERM_  | GO:001989 | 8     | 11.5942  | 0.015302 | CAV1, REL    | 66         | 523      | 12983     |
| GOTERM_  | GO:000512 | 5     | 7.246377 | 0.016392 | IL6, CCL2, I | 66         | 195      | 12983     |
| GOTERM_  | GO:000550 | 6     | 8.695652 | 0.018855 | CYP3A4, C    | 66         | 308      | 12983     |
| GOTERM_  | GO:001982 | 3     | 4.347826 | 0.019533 | CYP3A4, C    | 66         | 43       | 12983     |
| GOTERM_  | GO:004633 | 3     | 4.347826 | 0.022175 | FOS, JUN, I  | 66         | 46       | 12983     |
| GOTERM_  | GO:000370 | 11    | 15.94203 | 0.022343 | PGR, FOS,    | 66         | 975      | 12983     |
| GOTERM_  | GO:001620 | 3     | 4.347826 | 0.023087 | PTGS2, PTG   | 66         | 47       | 12983     |
| GOTERM_  | GO:000905 | 5     | 7.246377 | 0.024665 | CYP3A4, C    | 66         | 221      | 12983     |
| GOTERM_  | GO:000498 | 2     | 2.898551 | 0.024787 | CHRM3, CI    | 66         | 5        | 12983     |
| GOTERM_  | GO:001690 | 2     | 2.898551 | 0.024787 | CHRM3, CI    | 66         | 5        | 12983     |
| GOTERM_  | GO:001990 | 6     | 8.695652 | 0.024833 | NCF1, BCL    | 66         | 331      | 12983     |
| GOTERM_  | GO:001084 | 3     | 4.347826 | 0.033017 | FOS, JUN, I  | 66         | 57       | 12983     |
| GOTERM_  | GO:003052 | 14    | 20.28986 | 0.034861 | PPARD, RX    | 66         | 1512     | 12983     |
| GOTERM_  | GO:000517 | 3     | 4.347826 | 0.035172 | VCAM1, IC    | 66         | 59       | 12983     |
| GOTERM_  | GO:004356 | 4     | 5.797101 | 0.036056 | FOS, JUN, I  | 66         | 145      | 12983     |
| GOTERM_  | GO:003361 | 2     | 2.898551 | 0.039368 | RELA, PPAI   | 66         | 8        | 12983     |
| GOTERM_  | GO:000417 | 6     | 8.695652 | 0.039406 | PLAT, CASI   | 66         | 375      | 12983     |
| GOTERM_  | GO:000813 | 7     | 10.14493 | 0.042841 | PPARD, RE    | 66         | 513      | 12983     |
| GOTERM_  | GO:000495 | 2     | 2.898551 | 0.04418  | PTGER3, PI   | 66         | 9        | 12983     |
| GOTERM_  | GO:007041 | 2     | 2.898551 | 0.048969 | FOS, JUN     | 66         | 10       | 12983     |
| GOTERM_  | GO:000495 | 2     | 2.898551 | 0.048969 | PTGER3, PI   | 66         | 10       | 12983     |
| GOTERM_  | GO:000495 | 2     | 2.898551 | 0.048969 | PTGER3, PI   | 66         | 10       | 12983     |
| GOTERM_  | GO:004748 | 3     | 4.347826 | 0.052948 | PGR, RELA    | 66         | 74       | 12983     |
| GOTERM_  | GO:004840 | 2     | 2.898551 | 0.053734 | COL3A1, C    | 66         | 11       | 12983     |
| GOTERM_  | GO:001656 | 6     | 8.695652 | 0.054104 | PPARD, BC    | 66         | 410      | 12983     |
| GOTERM_  | GO:000467 | 6     | 8.695652 | 0.06377  | PRKCA, CD    | 66         | 430      | 12983     |
| GOTERM_  | GO:000823 | 7     | 10.14493 | 0.066798 | PLAT, CASI   | 66         | 574      | 12983     |
| GOTERM_  | GO:000469 | 2     | 2.898551 | 0.07256  | PRKCA, PR    | 66         | 15       | 12983     |
| GOTERM_  | GO:001546 | 2     | 2.898551 | 0.086438 | CHRM3, CI    | 66         | 18       | 12983     |
| GOTERM_  | GO:004691 | 20    | 28.98551 | 0.086983 | PRKCA, CY    | 66         | 2785     | 12983     |
| GOTERM_  | GO:000202 | 2     | 2.898551 | 0.091018 | BCL2, F3     | 66         | 19       | 12983     |

| Fold Enrich | Bonferroni | Benjamini | FDR      |
|-------------|------------|-----------|----------|
| 5.682795    | 5.85E-04   | 5.85E-04  | 0.00263  |
| 4.61044     | 7.61E-04   | 3.80E-04  | 0.003418 |
| 20.34953    | 0.002979   | 9.94E-04  | 0.013401 |
| 23.98928    | 0.014863   | 0.003737  | 0.067248 |
| 4.35525     | 0.020564   | 0.004147  | 0.093303 |
| 20.07267    | 0.029946   | 0.005054  | 0.136492 |
| 17.25545    | 0.053524   | 0.007828  | 0.246823 |
| 15.36813    | 0.082587   | 0.010717  | 0.38649  |
| 98.35606    | 0.102877   | 0.01199   | 0.48652  |
| 6.620119    | 0.161218   | 0.017427  | 0.786678 |
| 59.01364    | 0.275022   | 0.028814  | 1.434444 |
| 9.367244    | 0.426977   | 0.045342  | 2.470489 |
| 6.0218      | 0.584958   | 0.065407  | 3.87352  |
| 3.240727    | 0.601408   | 0.063589  | 4.048009 |
| 8.1286      | 0.6066     | 0.060301  | 4.104507 |
| 7.624501    | 0.690881   | 0.070749  | 5.137572 |
| 4.122709    | 0.851363   | 0.106074  | 8.207251 |
| 20.34953    | 0.935464   | 0.141228  | 11.58394 |
| 19.67121    | 0.946485   | 0.142809  | 12.32463 |
| 196.7121    | 0.949282   | 0.138494  | 12.53582 |
| 2.921467    | 0.955223   | 0.137489  | 13.02395 |
| 8.11184     | 0.977139   | 0.157804  | 15.6115  |
| 131.1414    | 0.98858    | 0.176714  | 18.20213 |
| 131.1414    | 0.98858    | 0.176714  | 18.20213 |
| 3.008981    | 0.989743   | 0.173724  | 18.59604 |
| 5.043901    | 0.992619   | 0.178278  | 19.79032 |
| 3.832054    | 0.996495   | 0.195427  | 22.42936 |
| 13.7241     | 0.997145   | 0.195061  | 23.14102 |
| 12.82905    | 0.998719   | 0.211686  | 25.85879 |
| 2.219316    | 0.998783   | 0.206596  | 26.02913 |
| 12.55609    | 0.999029   | 0.206449  | 26.77592 |
| 4.4505      | 0.999399   | 0.2128    | 28.33915 |
| 78.68485    | 0.999421   | 0.20781   | 28.45839 |
| 78.68485    | 0.999421   | 0.20781   | 28.45839 |
| 3.565779    | 0.999429   | 0.202539  | 28.50366 |
| 10.35327    | 0.999953   | 0.254191  | 36.10778 |
| 1.821409    | 0.999974   | 0.259997  | 37.71425 |
| 10.00231    | 0.999976   | 0.255764  | 37.98164 |
| 5.426541    | 0.999982   | 0.255295  | 38.73504 |
| 49.17803    | 0.999993   | 0.269417  | 41.48503 |
| 3.147394    | 0.999993   | 0.263733  | 41.51574 |
| 2.684181    | 0.999998   | 0.277549  | 44.24519 |
| 43.7138     | 0.999999   | 0.279149  | 45.27758 |
| 39.34242    | 1          | 0.29886   | 48.82459 |
| 39.34242    | 1          | 0.29886   | 48.82459 |
| 39.34242    | 1          | 0.29886   | 48.82459 |
| 7.974816    | 1          | 0.313225  | 51.60883 |
| 35.76584    | 1          | 0.311206  | 52.14194 |
| 2.878714    | 1          | 0.307267  | 52.391   |
| 2.74482     | 1          | 0.346524  | 58.48854 |
| 2.398928    | 1          | 0.353941  | 60.2443  |
| 26.22828    | 1          | 0.372549  | 63.39776 |
| 21.8569     | 1          | 0.42187   | 70.06713 |
| 1.412654    | 1          | 0.41757   | 70.30483 |
| 20.70654    | 1          | 0.426351  | 72.00863 |
