# Supplementary material for: Network Pharmacology-Based Study on the Active Component and Mechanism of the Anti-Non-Invasive and Invasive Bladder Urothelial Carcinoma Effects of Zhuling Jisheng Decoction
Source: Hindawi journal article supplement (doi:10.1155/2021/7667707), 2021-12-31
Supplement: f1 [file 7667707.f1.zip]

Archive with 4 entries (4 files):
- supplementary table1.pdf
- supplementary table2.pdf
- supplementary table3.pdf
- supplementary table4.pdf
